# Supplementary material
Source: publisher figshare collection journal article supplement (https://gsapubs.figshare.com/ndownloader/files/30620370)
Supplement: Supplementary file 1 [file 30620370]

## Sheet: Database
TABLE S4. BIOTITE AR/AR AND K/AR DATA FROM WESTERN NORTH AMERICA*
Sample ID	Calculated Age	Error	Age Method	Latitude	Longitude	State/Province/ Territory	Author(s)
759C	57.4		K-Ar	35.4461	-116.313		"Spencer, Jon E." 1991
12945	51.7	3.6	K-Ar	49.1332	-118.418	British Columbia	Addie, G.G.
11503	67.1	4.6	K-Ar	53.3082	-125.277	British Columbia	Andrew, K.P.E.
13350	110.09	0.72	Ar-Ar	49.3678	-117.09	British Columbia	Archibald, D.A.
14546	174	3	Ar-Ar	50.7062	-127.569	British Columbia	Archibald, D.A. and Nixon, G.T.
14547	174	2	Ar-Ar	50.5966	-127.418	British Columbia	Archibald, D.A. and Nixon, G.T.
14548	167	9	Ar-Ar	50.7243	-127.904	British Columbia	Archibald, D.A. and Nixon, G.T.
12789	162.1	3.3	K-Ar	49.1478	-116.979	British Columbia	Archibald, D.A., Glover, J.K., Price, R.A., Farrar, E. and Carmichael, D.M.
12790	52.3	1.2	K-Ar	49.2699	-117.209	British Columbia	Archibald, D.A., Glover, J.K., Price, R.A., Farrar, E. and Carmichael, D.M.
12792	147.2	3	K-Ar	49.1788	-116.944	British Columbia	Archibald, D.A., Glover, J.K., Price, R.A., Farrar, E. and Carmichael, D.M.
12793	152.9	3.1	K-Ar	49.1746	-116.958	British Columbia	Archibald, D.A., Glover, J.K., Price, R.A., Farrar, E. and Carmichael, D.M.
12794	162.65	1.82	K-Ar	49.1641	-116.972	British Columbia	Archibald, D.A., Glover, J.K., Price, R.A., Farrar, E. and Carmichael, D.M.
12794	163.7	3.3	K-Ar	49.1641	-116.972	British Columbia	Archibald, D.A., Glover, J.K., Price, R.A., Farrar, E. and Carmichael, D.M.
12797	61.2	1.3	K-Ar	49.6111	-117.144	British Columbia	Archibald, D.A., Glover, J.K., Price, R.A., Farrar, E. and Carmichael, D.M.
12803	102	2.1	K-Ar	49.0703	-117.129	British Columbia	Archibald, D.A., Glover, J.K., Price, R.A., Farrar, E. and Carmichael, D.M.
12806	140.9	3	K-Ar	49.2329	-116.952	British Columbia	Archibald, D.A., Glover, J.K., Price, R.A., Farrar, E. and Carmichael, D.M.
12809	164.7	3.4	K-Ar	49.1274	-117.022	British Columbia	Archibald, D.A., Glover, J.K., Price, R.A., Farrar, E. and Carmichael, D.M.
12811	128.05	2.15	Ar-Ar	49.1999	-116.907	British Columbia	Archibald, D.A., Glover, J.K., Price, R.A., Farrar, E. and Carmichael, D.M.
12812	99.8	2.1	K-Ar	49.2011	-116.887	British Columbia	Archibald, D.A., Glover, J.K., Price, R.A., Farrar, E. and Carmichael, D.M.
12813	102.2	2.1	K-Ar	49.2029	-117.005	British Columbia	Archibald, D.A., Glover, J.K., Price, R.A., Farrar, E. and Carmichael, D.M.
12814	115.2	2.4	K-Ar	49.1911	-117.007	British Columbia	Archibald, D.A., Glover, J.K., Price, R.A., Farrar, E. and Carmichael, D.M.
12818	98.3	1.1	K-Ar	49.1508	-117.146	British Columbia	Archibald, D.A., Glover, J.K., Price, R.A., Farrar, E. and Carmichael, D.M.
12819	107.1	2.2	K-Ar	49.2599	-117.096	British Columbia	Archibald, D.A., Glover, J.K., Price, R.A., Farrar, E. and Carmichael, D.M.
12822	126.2	2.6	K-Ar	49.2291	-116.997	British Columbia	Archibald, D.A., Glover, J.K., Price, R.A., Farrar, E. and Carmichael, D.M.
12823	152.85	1.8	K-Ar	49.1704	-116.912	British Columbia	Archibald, D.A., Glover, J.K., Price, R.A., Farrar, E. and Carmichael, D.M.
12825	50.5	1.1	K-Ar	49.2983	-116.903	British Columbia	Archibald, D.A., Glover, J.K., Price, R.A., Farrar, E. and Carmichael, D.M.
12827	159	3.2	K-Ar	49.1374	-116.955	British Columbia	Archibald, D.A., Glover, J.K., Price, R.A., Farrar, E. and Carmichael, D.M.
12828	72.4	1.6	K-Ar	49.2046	-116.859	British Columbia	Archibald, D.A., Glover, J.K., Price, R.A., Farrar, E. and Carmichael, D.M.
12829	66.4	1.6	K-Ar	49.2129	-116.851	British Columbia	Archibald, D.A., Glover, J.K., Price, R.A., Farrar, E. and Carmichael, D.M.
12829	67.69	0.15	Ar-Ar	49.2129	-116.851	British Columbia	Archibald, D.A., Glover, J.K., Price, R.A., Farrar, E. and Carmichael, D.M.
12830	100.4	2.1	K-Ar	49.2028	-117.049	British Columbia	Archibald, D.A., Glover, J.K., Price, R.A., Farrar, E. and Carmichael, D.M.
12831	102.5	2.1	K-Ar	49.0854	-117.022	British Columbia	Archibald, D.A., Glover, J.K., Price, R.A., Farrar, E. and Carmichael, D.M.
12857	141.9	2.9	K-Ar	49.2544	-116.908	British Columbia	Archibald, D.A., Glover, J.K., Price, R.A., Farrar, E. and Carmichael, D.M.
12953	54.1	1.1	K-Ar	49.2844	-116.877	British Columbia	Archibald, D.A., Glover, J.K., Price, R.A., Farrar, E. and Carmichael, D.M.
12954	146.7	3	K-Ar	49.1953	-116.987	British Columbia	Archibald, D.A., Glover, J.K., Price, R.A., Farrar, E. and Carmichael, D.M.
12955	123.9	2.6	K-Ar	49.4419	-117.116	British Columbia	Archibald, D.A., Glover, J.K., Price, R.A., Farrar, E. and Carmichael, D.M.
12959	51.7	1.1	K-Ar	49.2441	-116.82	British Columbia	Archibald, D.A., Glover, J.K., Price, R.A., Farrar, E. and Carmichael, D.M.
12960	59.3	1.3	K-Ar	49.2313	-116.841	British Columbia	Archibald, D.A., Glover, J.K., Price, R.A., Farrar, E. and Carmichael, D.M.
12962	54.1	1.2	K-Ar	49.1921	-116.78	British Columbia	Archibald, D.A., Glover, J.K., Price, R.A., Farrar, E. and Carmichael, D.M.
12963	67.2	1.4	K-Ar	49.1799	-116.828	British Columbia	Archibald, D.A., Glover, J.K., Price, R.A., Farrar, E. and Carmichael, D.M.
12964	158.1	3.2	K-Ar	49.1511	-116.938	British Columbia	Archibald, D.A., Glover, J.K., Price, R.A., Farrar, E. and Carmichael, D.M.
12964	158.56	0.21	Ar-Ar	49.1511	-116.938	British Columbia	Archibald, D.A., Glover, J.K., Price, R.A., Farrar, E. and Carmichael, D.M.
12987	127.1	2.6	K-Ar	49.1644	-116.866	British Columbia	Archibald, D.A., Glover, J.K., Price, R.A., Farrar, E. and Carmichael, D.M.
12991	147.3	3	K-Ar	49.2071	-116.952	British Columbia	Archibald, D.A., Glover, J.K., Price, R.A., Farrar, E. and Carmichael, D.M.
12992	76.9	1.7	K-Ar	49.2154	-116.883	British Columbia	Archibald, D.A., Glover, J.K., Price, R.A., Farrar, E. and Carmichael, D.M.
12993	102.2	2.1	K-Ar	49.0721	-117.036	British Columbia	Archibald, D.A., Glover, J.K., Price, R.A., Farrar, E. and Carmichael, D.M.
13007	207.895	2.355	K-Ar	49.0921	-116.927	British Columbia	Archibald, D.A., Glover, J.K., Price, R.A., Farrar, E. and Carmichael, D.M.
13021	130.4	2.7	K-Ar	49.7536	-117.154	British Columbia	Archibald, D.A., Glover, J.K., Price, R.A., Farrar, E. and Carmichael, D.M.
13117	128	0.5	Ar-Ar	49.1613	-116.87	British Columbia	Archibald, D.A., Glover, J.K., Price, R.A., Farrar, E. and Carmichael, D.M.
13173	156.3	3.2	K-Ar	49.1233	-116.917	British Columbia	Archibald, D.A., Glover, J.K., Price, R.A., Farrar, E. and Carmichael, D.M.
12243	89.1	1.9	K-Ar	50.7349	-116.926	British Columbia	Archibald, D.A., Krogh, T.E., Armstrong, R.L. and Farrar, E.
12244	93.5	1.5	K-Ar	50.76	-116.831	British Columbia	Archibald, D.A., Krogh, T.E., Armstrong, R.L. and Farrar, E.
12260	57.7	1.2	K-Ar	50.0899	-116.558	British Columbia	Archibald, D.A., Krogh, T.E., Armstrong, R.L. and Farrar, E.
12278	95.1	2.1	K-Ar	50.6033	-116.513	British Columbia	Archibald, D.A., Krogh, T.E., Armstrong, R.L. and Farrar, E.
12301	99.305	1.29	Ar-Ar	49.55	-116.144	British Columbia	Archibald, D.A., Krogh, T.E., Armstrong, R.L. and Farrar, E.
12784	92.4	2	K-Ar	49.3571	-116.724	British Columbia	Archibald, D.A., Krogh, T.E., Armstrong, R.L. and Farrar, E.
12785	60.2	1.3	K-Ar	49.6211	-116.777	British Columbia	Archibald, D.A., Krogh, T.E., Armstrong, R.L. and Farrar, E.
12795	93.6	2	K-Ar	49.4269	-116.579	British Columbia	Archibald, D.A., Krogh, T.E., Armstrong, R.L. and Farrar, E.
12810	63.8	1.4	K-Ar	49.7696	-116.558	British Columbia	Archibald, D.A., Krogh, T.E., Armstrong, R.L. and Farrar, E.
12816	95.2	2	K-Ar	49.4513	-116.532	British Columbia	Archibald, D.A., Krogh, T.E., Armstrong, R.L. and Farrar, E.
12817	98.7	2.1	K-Ar	49.4383	-116.527	British Columbia	Archibald, D.A., Krogh, T.E., Armstrong, R.L. and Farrar, E.
12817	102.5	8.3	Ar-Ar	49.4383	-116.527	British Columbia	Archibald, D.A., Krogh, T.E., Armstrong, R.L. and Farrar, E.
12820	96.3	2	K-Ar	49.3536	-116.459	British Columbia	Archibald, D.A., Krogh, T.E., Armstrong, R.L. and Farrar, E.
12821	98.9	1	K-Ar	49.3579	-116.478	British Columbia	Archibald, D.A., Krogh, T.E., Armstrong, R.L. and Farrar, E.
12841	50.8	1.1	K-Ar	49.4271	-116.813	British Columbia	Archibald, D.A., Krogh, T.E., Armstrong, R.L. and Farrar, E.
12842	83.3	1.7	K-Ar	49.3669	-116.724	British Columbia	Archibald, D.A., Krogh, T.E., Armstrong, R.L. and Farrar, E.
12843	88.6	1.8	K-Ar	49.3336	-116.7	British Columbia	Archibald, D.A., Krogh, T.E., Armstrong, R.L. and Farrar, E.
12844	69	1.5	K-Ar	49.2344	-116.607	British Columbia	Archibald, D.A., Krogh, T.E., Armstrong, R.L. and Farrar, E.
12845	72.1	1.6	K-Ar	49.2044	-116.583	British Columbia	Archibald, D.A., Krogh, T.E., Armstrong, R.L. and Farrar, E.
12850	53.6	1.1	K-Ar	49.6375	-116.804	British Columbia	Archibald, D.A., Krogh, T.E., Armstrong, R.L. and Farrar, E.
12853	51	1.1	K-Ar	49.8841	-116.861	British Columbia	Archibald, D.A., Krogh, T.E., Armstrong, R.L. and Farrar, E.
12854	89.7	1.9	K-Ar	49.4099	-116.592	British Columbia	Archibald, D.A., Krogh, T.E., Armstrong, R.L. and Farrar, E.
12855	81.6	1.7	K-Ar	49.3233	-116.684	British Columbia	Archibald, D.A., Krogh, T.E., Armstrong, R.L. and Farrar, E.
12858	71.6	1.5	K-Ar	49.2854	-116.649	British Columbia	Archibald, D.A., Krogh, T.E., Armstrong, R.L. and Farrar, E.
12890	80.9	1.7	K-Ar	49.4153	-116.744	British Columbia	Archibald, D.A., Krogh, T.E., Armstrong, R.L. and Farrar, E.
12900	53.6	1.1	K-Ar	49.663	-116.8	British Columbia	Archibald, D.A., Krogh, T.E., Armstrong, R.L. and Farrar, E.
12918	53	1.1	K-Ar	49.9146	-116.79	British Columbia	Archibald, D.A., Krogh, T.E., Armstrong, R.L. and Farrar, E.
12956	50.1	1.1	K-Ar	49.2666	-116.768	British Columbia	Archibald, D.A., Krogh, T.E., Armstrong, R.L. and Farrar, E.
12958	50.7	1.1	K-Ar	49.2588	-116.786	British Columbia	Archibald, D.A., Krogh, T.E., Armstrong, R.L. and Farrar, E.
12961	51.8	1.1	K-Ar	49.1733	-116.729	British Columbia	Archibald, D.A., Krogh, T.E., Armstrong, R.L. and Farrar, E.
12962	55.8	1.1	Ar-Ar	49.1921	-116.78	British Columbia	Archibald, D.A., Krogh, T.E., Armstrong, R.L. and Farrar, E.
12988	71.2	1.5	K-Ar	49.2596	-116.636	British Columbia	Archibald, D.A., Krogh, T.E., Armstrong, R.L. and Farrar, E.
12994	90	1.9	K-Ar	49.3108	-116.666	British Columbia	Archibald, D.A., Krogh, T.E., Armstrong, R.L. and Farrar, E.
12998	90.67	1.14	K-Ar	49.4046	-116.578	British Columbia	Archibald, D.A., Krogh, T.E., Armstrong, R.L. and Farrar, E.
12999	78.9	1.7	K-Ar	49.3899	-116.669	British Columbia	Archibald, D.A., Krogh, T.E., Armstrong, R.L. and Farrar, E.
13001	51.1	1.1	K-Ar	49.3866	-116.81	British Columbia	Archibald, D.A., Krogh, T.E., Armstrong, R.L. and Farrar, E.
SC-69-10	72.8	1	Ar-Ar (recalculated from K-Ar)	34.0287	-116.202	Nevada, Utah, and California	Armstrong and Suppe, 1973
SC-69-12	148.2	2	Ar-Ar (recalculated from K-Ar)	33.9993	-115.713	Nevada, Utah, and California	Armstrong and Suppe, 1973
SC-69-13	72.7	1	Ar-Ar (recalculated from K-Ar)	33.8401	-115.773	Nevada, Utah, and California	Armstrong and Suppe, 1973
SC-69-14	72.9	1.4	Ar-Ar (recalculated from K-Ar)	33.7861	-115.8	Nevada, Utah, and California	Armstrong and Suppe, 1973
SC-69-153	62.7	0.9	Ar-Ar (recalculated from K-Ar)	33.567	-116.228	Nevada, Utah, and California	Armstrong and Suppe, 1973
SC-69-154	76.5	1.5	Ar-Ar (recalculated from K-Ar)	33.026	-116.069	Nevada, Utah, and California	Armstrong and Suppe, 1973
SC-69-155	78.7	1.5	Ar-Ar (recalculated from K-Ar)	33.218	-116.458	Nevada, Utah, and California	Armstrong and Suppe, 1973
SC-69-156	77.2	1.5	Ar-Ar (recalculated from K-Ar)	33.135	-116.372	Nevada, Utah, and California	Armstrong and Suppe, 1973
SC-69-157	80.3	1.6	Ar-Ar (recalculated from K-Ar)	32.971	-116.414	Nevada, Utah, and California	Armstrong and Suppe, 1973
SC-69-158	77.3	1.1	Ar-Ar (recalculated from K-Ar)	32.716	-116.069	Nevada, Utah, and California	Armstrong and Suppe, 1973
SC-69-159	72.6	1	Ar-Ar (recalculated from K-Ar)	33.4638	-115.129	Nevada, Utah, and California	Armstrong and Suppe, 1973
SC-69-16	71.8	1	Ar-Ar (recalculated from K-Ar)	34.4907	-116.835	Nevada, Utah, and California	Armstrong and Suppe, 1973
SC-69-161	90.9	1.3	Ar-Ar (recalculated from K-Ar)	33.6284	-115.36	Nevada, Utah, and California	Armstrong and Suppe, 1973
SC-69-162	73.1	1	Ar-Ar (recalculated from K-Ar)	33.6234	-115.302	Nevada, Utah, and California	Armstrong and Suppe, 1973
SC-69-163	75.7	1.5	Ar-Ar (recalculated from K-Ar)	33.6623	-115.68	Nevada, Utah, and California	Armstrong and Suppe, 1973
SC-69-163	76.6	1.5	Ar-Ar (recalculated from K-Ar)	33.6623	-115.68	Nevada, Utah, and California	Armstrong and Suppe, 1973
SC-69-18	73.8	1.4	Ar-Ar (recalculated from K-Ar)	34.7148	-116.758	Nevada, Utah, and California	Armstrong and Suppe, 1973
SC-69-19	72.6	1.4	Ar-Ar (recalculated from K-Ar)	34.3368	-116.843	Nevada, Utah, and California	Armstrong and Suppe, 1973
SC-69-1b	114.6	2	Ar-Ar (recalculated from K-Ar)	33.869	-117.526	Nevada, Utah, and California	Armstrong and Suppe, 1973
SC-69-20	70.1	1	Ar-Ar (recalculated from K-Ar)	34.1688	-116.801	Nevada, Utah, and California	Armstrong and Suppe, 1973
SC-69-21	73.7	1	Ar-Ar (recalculated from K-Ar)	34.2756	-116.97	Nevada, Utah, and California	Armstrong and Suppe, 1973
SC-69-22	83.2	1.2	Ar-Ar (recalculated from K-Ar)	34.2904	-116.986	Nevada, Utah, and California	Armstrong and Suppe, 1973
SC-69-23	80.1	1.2	Ar-Ar (recalculated from K-Ar)	34.3567	-117.119	Nevada, Utah, and California	Armstrong and Suppe, 1973
SC-69-24	74	1.4	Ar-Ar (recalculated from K-Ar)	34.5403	-117.292	Nevada, Utah, and California	Armstrong and Suppe, 1973
SC-69-26	70.5	1.4	Ar-Ar (recalculated from K-Ar)	34.7904	-117.086	Nevada, Utah, and California	Armstrong and Suppe, 1973
SC-69-27	78.9	1.1	Ar-Ar (recalculated from K-Ar)	35.126	-116.85	Nevada, Utah, and California	Armstrong and Suppe, 1973
SC-69-28	92.6	2	Ar-Ar (recalculated from K-Ar)	35.124	-116.929	Nevada, Utah, and California	Armstrong and Suppe, 1973
SC-69-30	90.2	1.3	Ar-Ar (recalculated from K-Ar)	33.799	-117.119	Nevada, Utah, and California	Armstrong and Suppe, 1973
SC-69-36	94.5	1.8	Ar-Ar (recalculated from K-Ar)	33.747	-117.101	Nevada, Utah, and California	Armstrong and Suppe, 1973
SC-69-37	92.3	1.8	Ar-Ar (recalculated from K-Ar)	33.716	-117.119	Nevada, Utah, and California	Armstrong and Suppe, 1973
SC-69-39	89.4	1.7	Ar-Ar (recalculated from K-Ar)	33.61	-116.934	Nevada, Utah, and California	Armstrong and Suppe, 1973
SC-69-40	89	1.3	Ar-Ar (recalculated from K-Ar)	33.701	-116.773	Nevada, Utah, and California	Armstrong and Suppe, 1973
SC-69-41	81.1	1	Ar-Ar (recalculated from K-Ar)	33.7	-116.731	Nevada, Utah, and California	Armstrong and Suppe, 1973
SC-69-42	84.9	1.7	Ar-Ar (recalculated from K-Ar)	33.623	-116.584	Nevada, Utah, and California	Armstrong and Suppe, 1973
SC-69-43	87	1.2	Ar-Ar (recalculated from K-Ar)	33.563	-116.591	Nevada, Utah, and California	Armstrong and Suppe, 1973
SC-69-44	77.1	1.1	Ar-Ar (recalculated from K-Ar)	33.571	-116.506	Nevada, Utah, and California	Armstrong and Suppe, 1973
SC-69-46	69.9	1	Ar-Ar (recalculated from K-Ar)	33.594	-116.458	Nevada, Utah, and California	Armstrong and Suppe, 1973
SC-69-47	65.1	1	Ar-Ar (recalculated from K-Ar)	33.788	-116.298	Nevada, Utah, and California	Armstrong and Suppe, 1973
SC-69-48	72.9	1	Ar-Ar (recalculated from K-Ar)	33.7618	-116.112	Nevada, Utah, and California	Armstrong and Suppe, 1973
SC-69-53	64.1	1.3	Ar-Ar (recalculated from K-Ar)	32.839	-114.798	Nevada, Utah, and California	Armstrong and Suppe, 1973
SC-69-55	55.4	0.8	Ar-Ar (recalculated from K-Ar)	32.8645	-114.782	Nevada, Utah, and California	Armstrong and Suppe, 1973
SC-69-56	54.2	0.8	Ar-Ar (recalculated from K-Ar)	32.9156	-114.821	Nevada, Utah, and California	Armstrong and Suppe, 1973
SC-69-57	57.6	0.8	Ar-Ar (recalculated from K-Ar)	33.1403	-114.943	Nevada, Utah, and California	Armstrong and Suppe, 1973
SC-69-59	64.9	1.3	Ar-Ar (recalculated from K-Ar)	33.8123	-114.802	Nevada, Utah, and California	Armstrong and Suppe, 1973
SC-69-60	64	1.3	Ar-Ar (recalculated from K-Ar)	33.8168	-114.831	Nevada, Utah, and California	Armstrong and Suppe, 1973
SC-69-60	65.8	1.3	Ar-Ar (recalculated from K-Ar)	33.8168	-114.831	Nevada, Utah, and California	Armstrong and Suppe, 1973
SC-69-62	95	1.9	Ar-Ar (recalculated from K-Ar)	32.0688	-114.682	Nevada, Utah, and California	Armstrong and Suppe, 1973
SC-69-63	97.8	1.9	Ar-Ar (recalculated from K-Ar)	34.254	-114.798	Nevada, Utah, and California	Armstrong and Suppe, 1973
SC-69-64	95.8	1.9	Ar-Ar (recalculated from K-Ar)	34.1834	-114.757	Nevada, Utah, and California	Armstrong and Suppe, 1973
SC-69-65	65.5	1.3	Ar-Ar (recalculated from K-Ar)	34.0858	-115.2	Nevada, Utah, and California	Armstrong and Suppe, 1973
SC-69-66	63.8	1.2	Ar-Ar (recalculated from K-Ar)	34.0472	-115.194	Nevada, Utah, and California	Armstrong and Suppe, 1973
SC-69-67	70.6	1	Ar-Ar (recalculated from K-Ar)	33.9389	-115.309	Nevada, Utah, and California	Armstrong and Suppe, 1973
SC-69-68	54.8	1.5	Ar-Ar (recalculated from K-Ar)	34.1146	-115.483	Nevada, Utah, and California	Armstrong and Suppe, 1973
SC-69-69	68.5	0.9	Ar-Ar (recalculated from K-Ar)	34.2298	-115.745	Nevada, Utah, and California	Armstrong and Suppe, 1973
SC-69-7	66.3	1.3	Ar-Ar (recalculated from K-Ar)	34.1414	-116.48	Nevada, Utah, and California	Armstrong and Suppe, 1973
SC-69-70	144.2	3.1	Ar-Ar (recalculated from K-Ar)	34.6051	-115.557	Nevada, Utah, and California	Armstrong and Suppe, 1973
SC-69-71	157.4	2	Ar-Ar (recalculated from K-Ar)	34.6069	-115.586	Nevada, Utah, and California	Armstrong and Suppe, 1973
SC-69-73	70.3	1.4	Ar-Ar (recalculated from K-Ar)	34.6587	-115.23	Nevada, Utah, and California	Armstrong and Suppe, 1973
SC-69-75	71.9	1	Ar-Ar (recalculated from K-Ar)	34.6835	-114.878	Nevada, Utah, and California	Armstrong and Suppe, 1973
SC-69-77	151.3	2	Ar-Ar (recalculated from K-Ar)	34.6131	-115.684	Nevada, Utah, and California	Armstrong and Suppe, 1973
SC-69-78	72.05	1.4	Ar-Ar (recalculated from K-Ar)	34.605	-115.961	Nevada, Utah, and California	Armstrong and Suppe, 1973
SC-69-79	138	2	Ar-Ar (recalculated from K-Ar)	34.8779	-116.263	Nevada, Utah, and California	Armstrong and Suppe, 1973
SC-69-8	69.5	1.4	Ar-Ar (recalculated from K-Ar)	34.094	-116.385	Nevada, Utah, and California	Armstrong and Suppe, 1973
SC-69-80	139.1	2	Ar-Ar (recalculated from K-Ar)	34.8399	-116.354	Nevada, Utah, and California	Armstrong and Suppe, 1973
SC-69-87	145.2	2	Ar-Ar (recalculated from K-Ar)	35.4866	-117.675	Nevada, Utah, and California	Armstrong and Suppe, 1973
SC-69-89	207.3	4.1	Ar-Ar (recalculated from K-Ar)	35.3745	-117.907	Nevada, Utah, and California	Armstrong and Suppe, 1973
SC-69-9	71	1	Ar-Ar (recalculated from K-Ar)	33.9278	-116.2	Nevada, Utah, and California	Armstrong and Suppe, 1973
35	132	5	K-Ar	44.8811	-118.144	Oregon, Washington, & Idaho	Armstrong et al 1977
133	82	3	K-Ar	44.6992	-116.202	Oregon, Washington, & Idaho	Armstrong et al 1977
152	84	3	K-Ar	44.8027	-116.246	Oregon, Washington, & Idaho	Armstrong et al 1977
160	79	3	K-Ar	44.5964	-116.108	Oregon, Washington, & Idaho	Armstrong et al 1977
180	118	4	K-Ar	45.2082	-117.55	Oregon, Washington, & Idaho	Armstrong et al 1977
204	72	2	K-Ar	43.291	-116.639	Oregon, Washington, & Idaho	Armstrong et al 1977
216	130.5	5.5	K-Ar	45.3268	-117.455	Oregon, Washington, & Idaho	Armstrong et al 1977
236	69	2	K-Ar	43.7852	-116.235	Oregon, Washington, & Idaho	Armstrong et al 1977
242	64	2	K-Ar	43.8775	-116.24	Oregon, Washington, & Idaho	Armstrong et al 1977
258	75	2	K-Ar	44.5733	-116.001	Oregon, Washington, & Idaho	Armstrong et al 1977
261	87	3	K-Ar	42.7547	-116.924	Oregon, Washington, & Idaho	Armstrong et al 1977
714	71	2	K-Ar	46.5556	-116.299	Oregon, Washington, & Idaho	Armstrong et al 1977
791	121	4	K-Ar	46.2243	-116.738	Oregon, Washington, & Idaho	Armstrong et al 1977
871	62.6	1.9	K-Ar	44.502	-115.17	Oregon, Washington, & Idaho	Armstrong et al 1977
925	69.6	2	K-Ar	44.5249	-115.315	Oregon, Washington, & Idaho	Armstrong et al 1977
926	74	3	K-Ar	44.4936	-115.321	Oregon, Washington, & Idaho	Armstrong et al 1977
1003	117	4	K-Ar	45.1804	-116.631	Oregon, Washington, & Idaho	Armstrong et al 1977
1040	86.5	3.5	K-Ar	44.3227	-114.58	Oregon, Washington, & Idaho	Armstrong et al 1977
1041	79	2	K-Ar	44.327	-114.614	Oregon, Washington, & Idaho	Armstrong et al 1977
1042	82	2	K-Ar	44.3299	-114.645	Oregon, Washington, & Idaho	Armstrong et al 1977
1043	79	2	K-Ar	44.3156	-114.774	Oregon, Washington, & Idaho	Armstrong et al 1977
876 (22)	65.2	2	K-Ar	44.9795	-116.14	Oregon, Washington, & Idaho	Armstrong et al 1977
877 (9a)	77	2	K-Ar	44.9795	-116.14	Oregon, Washington, & Idaho	Armstrong et al 1977
461	124	15	K-Ar	45.1522	-117.393	Oregon, Washington, & Idaho	Armstrong et al 1978
YU 1041	81	Unknown	K-Ar	44.2667	-114.724	Idaho	Armstrong, R L
YU 1042	84.1	Unknown	K-Ar	44.2694	-114.744	Idaho	Armstrong, R L
YU 1043	81	Unknown	K-Ar	44.2597	-114.836	Idaho	Armstrong, R L
YU 925	71.4	Unknown	K-Ar	44.45	-115.397	Idaho	Armstrong, R L
YU-McC 22	66.9	Unknown	K-Ar	44.975	-116.056	Idaho	Armstrong, R L
YU-WT 151	86.1	Unknown	K-Ar	44.7483	-116.273	Idaho	Armstrong, R L
YU-WT 204	74	Unknown	K-Ar	43.2803	-116.684	Idaho	Armstrong, R L
YU-WT 236	71	Unknown	K-Ar	43.7611	-116.271	Idaho	Armstrong, R L
YU-WT 237	68	Unknown	K-Ar	43.7606	-116.267	Idaho	Armstrong, R L
YU-WT 241	68	Unknown	K-Ar	43.8806	-116.041	Idaho	Armstrong, R L
YU-WT 242	66	Unknown	K-Ar	43.8531	-116.304	Idaho	Armstrong, R L
YU-WT 243	68	Unknown	K-Ar	43.8564	-116.319	Idaho	Armstrong, R L
YU-WT 261	89	Unknown	K-Ar	42.7583	-116.975	Idaho	Armstrong, R L
14131	101	6	K-Ar	49.3632	-121.531	British Columbia	Armstrong, R.L.
14135	213.6	1.2	Ar-Ar	49.9154	-120.854	British Columbia	Armstrong, R.L.
13211	158	10	K-Ar	49.8666	-117.334	British Columbia	Armstrong, R.L. and Durgin, D.
14069	52.8	3.6	K-Ar	49.7832	-120.335	British Columbia	Armstrong, R.L. and Peto, P.
13203	126	8	K-Ar	49.2166	-117.598	British Columbia	Armstrong, R.L. and Simony, P.
10107	96	3.4	K-Ar	59.2205	-134.189	British Columbia	Armstrong, R.L. and Werner, L.
10301	119	4	K-Ar	56.0637	-126.127	British Columbia	Armstrong, R.L., Monger, J.W.H. and Irving, E.
10302	111	4	K-Ar	56.0277	-126.085	British Columbia	Armstrong, R.L., Monger, J.W.H. and Irving, E.
10328	102.5	4	K-Ar	56.0637	-126.127	British Columbia	Armstrong, R.L., Monger, J.W.H. and Irving, E.
c7-2	154.3	0.8	Ar-Ar	41.4021	-123.215	California	B.R. Hacker (unpublished data)
11201	166	16	K-Ar	54.0666	-124.685	British Columbia	Baadsgaard, H., Folinsbee, R.E. and Lipson, J.I.
12866	59	5.8	K-Ar	49.0666	-117.968	British Columbia	Baadsgaard, H., Folinsbee, R.E. and Lipson, J.I.
12867	56.6	5.5	K-Ar	49.9999	-118.101	British Columbia	Baadsgaard, H., Folinsbee, R.E. and Lipson, J.I.
12868	56	5.4	K-Ar	49.0499	-118.051	British Columbia	Baadsgaard, H., Folinsbee, R.E. and Lipson, J.I.
12869	59	5.7	K-Ar	51.1333	-118.184	British Columbia	Baadsgaard, H., Folinsbee, R.E. and Lipson, J.I.
12870	362	35.5	K-Ar	51.1666	-116.384	British Columbia	Baadsgaard, H., Folinsbee, R.E. and Lipson, J.I.
12871	98	9.6	K-Ar	49.9666	-118.301	British Columbia	Baadsgaard, H., Folinsbee, R.E. and Lipson, J.I.
12873	310	30.4	K-Ar	51.1833	-116.451	British Columbia	Baadsgaard, H., Folinsbee, R.E. and Lipson, J.I.
13006	79	7.7	K-Ar	49.2499	-116.651	British Columbia	Baadsgaard, H., Folinsbee, R.E. and Lipson, J.I.
13685	190	18	K-Ar	50.4832	-120.968	British Columbia	Baadsgaard, H., Folinsbee, R.E. and Lipson, J.I.
13687	99	9.7	K-Ar	49.3332	-123.268	British Columbia	Baadsgaard, H., Folinsbee, R.E. and Lipson, J.I.
12581	160.4	0.6	Ar-Ar	49.9429	-119.616	British Columbia	Bardoux, M.
HL-4	82		K-Ar	37.2333	-119.159	Sierra Nevada	Bateman and Wones, 1972
HL-9	83		K-Ar	37.35	-119.155	Sierra Nevada	Bateman and Wones, 1972
HLa-16	88.9		K-Ar	37.1333	-119.199	Sierra Nevada	Bateman and Wones, 1972
HLa-46	86.3		K-Ar	37.2	-119.241	Sierra Nevada	Bateman and Wones, 1972
HLa-80	88.3		K-Ar	37.2083	-119.141	Sierra Nevada	Bateman and Wones, 1972
HLc-126	87.6		K-Ar	37.1167	-119.146	Sierra Nevada	Bateman and Wones, 1972
HLc-68	90.3		K-Ar	37.0306	-119.149	Sierra Nevada	Bateman and Wones, 1972
HLd-102	87.5		K-Ar	37.0875	-119.125	Sierra Nevada	Bateman and Wones, 1972
HLd-20	86.6		K-Ar	37.0569	-119.149	Sierra Nevada	Bateman and Wones, 1972
HLd-6	86.7		K-Ar	37.1056	-119.025	Sierra Nevada	Bateman and Wones, 1972
356M	154.3	0.8	Ar-Ar	41.41	-123.193	California	Berry, 2015
EP-141	154.5	1.4	Ar-Ar	41.4167	-123.164	California	Berry, 2015
EP-176B	160.4	1.4	Ar-Ar	41.4022	-123.207	California	Berry, 2015
12881	52.3	3.4	K-Ar	51.1358	-118.193	British Columbia	Birnie, D.J.
12944	58.9	6.1	K-Ar	51.0766	-117.933	British Columbia	Birnie, D.J.
13911	192	12	K-Ar	50.4849	-121.051	British Columbia	Branchflower, J.D.
13912	206	12	K-Ar	50.479	-121.096	British Columbia	Branchflower, J.D.
13913	201	12	K-Ar	50.4815	-121.07	British Columbia	Branchflower, J.D.
MPM-143R	97.4	1.1	Ar-Ar	41.9615	-118.406	Nevada	Brown 1996
10719	54.2	3.8	K-Ar	57.2629	-131.782	British Columbia	Brown, D.A., Gunning, M.H. and Greig, C.J.
10724	162	14	K-Ar	57.5788	-131.358	British Columbia	Brown, D.A., Gunning, M.H. and Greig, C.J.
10726	163	12	K-Ar	57.3585	-131.519	British Columbia	Brown, D.A., Gunning, M.H. and Greig, C.J.
10728	177	14	K-Ar	57.3676	-131.451	British Columbia	Brown, D.A., Gunning, M.H. and Greig, C.J.
10737	195	3	Ar-Ar	57.7976	-131.617	British Columbia	Brown, D.A., Gunning, M.H. and Greig, C.J.
10108	58	2.2	K-Ar	59.4414	-133.738	British Columbia	Bultman, R.B.
10412	123	4.8	K-Ar	59.4234	-134.288	British Columbia	Bultman, R.B.
10418	92	5.2	K-Ar	59.9219	-134.71	British Columbia	Bultman, R.B.
10419	80	3.2	K-Ar	59.8635	-134.773	British Columbia	Bultman, R.B.
10424	58	2.2	K-Ar	59.8135	-134.335	British Columbia	Bultman, R.B.
10427	84	4.2	K-Ar	59.79	-134.41	British Columbia	Bultman, R.B.
12730	61	2.4	K-Ar	59.4219	-134.438	British Columbia	Bultman, R.B.
14789	73.9	0.6	Ar-Ar	54.15	-130.135	British Columbia	Butler, R.F., Gehrels, G.E., Baldwin, S.L. and Davidson, C.
14790	54.7	0.2	Ar-Ar	54.2004	-129.976	British Columbia	Butler, R.F., Gehrels, G.E., Baldwin, S.L. and Davidson, C.
10162	182	12	K-Ar	57.0635	-126.774	British Columbia	Cann, R.M. and Godwin, C.I.
13802	114	6	K-Ar	49.3615	-123.273	British Columbia	Caron, M.E.
11223	85.2	11.2	K-Ar	53.5165	-127.218	British Columbia	Carter, N.C.
11224	50	4	K-Ar	55.0666	-126.335	British Columbia	Carter, N.C.
11226	53	4	K-Ar	53.7999	-127.435	British Columbia	Carter, N.C.
11228	50.8	4.2	K-Ar	53.7999	-127.435	British Columbia	Carter, N.C.
11229	181	16	K-Ar	53.9832	-127.602	British Columbia	Carter, N.C.
11232	50.2	4	K-Ar	53.2999	-127.002	British Columbia	Carter, N.C.
11233	53	4	K-Ar	55.0499	-126.335	British Columbia	Carter, N.C.
11234	50.2	4	K-Ar	53.2999	-127.002	British Columbia	Carter, N.C.
11235	50.7	4.2	K-Ar	54.9832	-126.235	British Columbia	Carter, N.C.
11236	51.5	6	K-Ar	54.9832	-126.235	British Columbia	Carter, N.C.
11237	52.2	3.2	K-Ar	55.2498	-128.902	British Columbia	Carter, N.C.
11239	52.9	6	K-Ar	55.1664	-129.268	British Columbia	Carter, N.C.
11240	54.1	4.6	K-Ar	55.1331	-129.335	British Columbia	Carter, N.C.
11241	50	4	K-Ar	55.1614	-129.318	British Columbia	Carter, N.C.
11242	51.4	6	K-Ar	55.4081	-129.51	British Columbia	Carter, N.C.
11243	53.9	4	K-Ar	55.4581	-129.335	British Columbia	Carter, N.C.
11246	54.4	6	K-Ar	55.5998	-129.385	British Columbia	Carter, N.C.
11247	53.5	5	K-Ar	55.4248	-129.49	British Columbia	Carter, N.C.
11248	54.2	6	K-Ar	55.4164	-129.427	British Columbia	Carter, N.C.
11249	71.3	6	K-Ar	54.4665	-127.185	British Columbia	Carter, N.C.
11250	55.8	6	K-Ar	54.9416	-126.16	British Columbia	Carter, N.C.
11251	53	4.2	K-Ar	55.1999	-126.335	British Columbia	Carter, N.C.
11255	83.1	6	K-Ar	53.6832	-127.168	British Columbia	Carter, N.C.
11257	73.5	6.2	K-Ar	55.1665	-127.635	British Columbia	Carter, N.C.
11258	51.6	4	K-Ar	54.9416	-126.16	British Columbia	Carter, N.C.
11260	55	3	K-Ar	53.7999	-127.435	British Columbia	Carter, N.C.
11262	51.5	4	K-Ar	54.9416	-126.16	British Columbia	Carter, N.C.
11265	83.8	6.2	K-Ar	55.5332	-127.635	British Columbia	Carter, N.C.
11266	54.7	4.4	K-Ar	55.5999	-127.468	British Columbia	Carter, N.C.
11267	52.6	4.4	K-Ar	55.4581	-129.335	British Columbia	Carter, N.C.
11270	74.6	6.8	K-Ar	54.8165	-127.285	British Columbia	Carter, N.C.
11271	53.9	4.4	K-Ar	54.0999	-126.885	British Columbia	Carter, N.C.
11272	105	8	K-Ar	55.4166	-126.335	British Columbia	Carter, N.C.
11274	51.6	4.2	K-Ar	55.0198	-129	British Columbia	Carter, N.C.
11275	178	14	K-Ar	54.7499	-126.185	British Columbia	Carter, N.C.
11276	84.8	6.4	K-Ar	53.6665	-127.052	British Columbia	Carter, N.C.
11277	57.2	4.6	K-Ar	54.1666	-126.285	British Columbia	Carter, N.C.
11281	52.3	3	K-Ar	55.4164	-129.427	British Columbia	Carter, N.C.
11284	78.3	5	K-Ar	54.7166	-126.335	British Columbia	Carter, N.C.
10028	75.4	2.5	K-Ar	59.633	-132.835	British Columbia	Christopher, P.A. and Pinsent
10111	71.6	2.2	K-Ar	59.7109	-133.405	British Columbia	Christopher, P.A. and Pinsent
10112	71.4	2.1	K-Ar	59.7109	-133.405	British Columbia	Christopher, P.A. and Pinsent
10113	71.6	2.1	K-Ar	59.7109	-133.405	British Columbia	Christopher, P.A. and Pinsent
10114	70.3	2.4	K-Ar	59.7109	-133.405	British Columbia	Christopher, P.A. and Pinsent
10115	73.3	2.6	K-Ar	59.7164	-133.418	British Columbia	Christopher, P.A. and Pinsent
10341	51.4	3	K-Ar	59.3781	-129.513	British Columbia	Christopher, P.A., White, W.H. and Harakal, J.E.
10344	72.9	5.2	K-Ar	59.2031	-129.841	British Columbia	Christopher, P.A., White, W.H. and Harakal, J.E.
10345	69.5	5.4	K-Ar	59.2244	-129.838	British Columbia	Christopher, P.A., White, W.H. and Harakal, J.E.
10346	63.1	4.4	K-Ar	59.708	-133.392	British Columbia	Christopher, P.A., White, W.H. and Harakal, J.E.
10347	50.9	3	K-Ar	59.3401	-129.508	British Columbia	Christopher, P.A., White, W.H. and Harakal, J.E.
13032	53	3.6	K-Ar	49.3832	-119.341	British Columbia	Church, B.N.
13050	143	10	K-Ar	49.1249	-118.551	British Columbia	Church, B.N.
14514	63.4	4.4	K-Ar	50.7467	-122.675	British Columbia	Church, B.N.
14521	85.9	6	K-Ar	50.7848	-122.862	British Columbia	Church, B.N.
11654	50.3	3	K-Ar	54.1165	-126.61	British Columbia	Church, B.N. and Barakso, J.J.
11655	77.2	4	K-Ar	54.0332	-126.785	British Columbia	Church, B.N. and Barakso, J.J.
11649	54.3	0	K-Ar	54.1999	-126.252	British Columbia	Church, B.N., Barakso, J. and Ball, D.
11650	62.7	0	K-Ar	54.1666	-126.285	British Columbia	Church, B.N., Barakso, J. and Ball, D.
13471	50.5	0.6	Ar-Ar	51.0384	-118.142	British Columbia	Colpron, M., Price, R.A. and Archibald, D.A.
10005	72.4	5	K-Ar	59.3434	-129.852	British Columbia	Cooke, B.J. and Godwin, C.I.
I 14a	62	Unknown	K-Ar	44.075	-115.542	Idaho	Criss, R E; Lanphere, M A; Taylor, H P, Jr
I 205	74.4	Unknown	K-Ar	44.9333	-115.95	Idaho	Criss, R E; Lanphere, M A; Taylor, H P, Jr
I 210	69.4	Unknown	K-Ar	44.6367	-115.78	Idaho	Criss, R E; Lanphere, M A; Taylor, H P, Jr
I 227	72.5	Unknown	K-Ar	44.2467	-114.885	Idaho	Criss, R E; Lanphere, M A; Taylor, H P, Jr
I 24a	71.8	Unknown	K-Ar	44.0833	-116.117	Idaho	Criss, R E; Lanphere, M A; Taylor, H P, Jr
I 32	92.9	Unknown	K-Ar	45.15	-116.283	Idaho	Criss, R E; Lanphere, M A; Taylor, H P, Jr
I 7	62.6	Unknown	K-Ar	44.35	-115.233	Idaho	Criss, R E; Lanphere, M A; Taylor, H P, Jr
I 9	58.6	Unknown	K-Ar	44.2333	-115.217	Idaho	Criss, R E; Lanphere, M A; Taylor, H P, Jr
RH 29	63.2	Unknown	K-Ar	43.7583	-115.235	Idaho	Criss, R E; Lanphere, M A; Taylor, H P, Jr
RH 43a	60.1	Unknown	K-Ar	43.8192	-115.353	Idaho	Criss, R E; Lanphere, M A; Taylor, H P, Jr
RH 57	65.6	Unknown	K-Ar	43.9583	-115.528	Idaho	Criss, R E; Lanphere, M A; Taylor, H P, Jr
RB 134	65.3	Unknown	K-Ar	44.2925	-115.641	Idaho	Criss, R E; Taylor, Hugh P, Jr
RB 148	68.6	Unknown	K-Ar	44.3033	-115.842	Idaho	Criss, R E; Taylor, Hugh P, Jr
RB 68	57.5	Unknown	K-Ar	43.7258	-115.95	Idaho	Criss, R E; Taylor, Hugh P, Jr
RB 70	60.4	Unknown	K-Ar	43.9094	-115.697	Idaho	Criss, R E; Taylor, Hugh P, Jr
RB 89f	68.5	Unknown	K-Ar	44.5433	-115.565	Idaho	Criss, R E; Taylor, Hugh P, Jr
RC 13	55.1	Unknown	K-Ar	44.045	-115.85	Idaho	Criss, R E; Taylor, Hugh P, Jr
RC 18	68	Unknown	K-Ar	44.0136	-115.963	Idaho	Criss, R E; Taylor, Hugh P, Jr
RC 39e	61.5	Unknown	K-Ar	44.1608	-115.175	Idaho	Criss, R E; Taylor, Hugh P, Jr
RC 3a	62.4	Unknown	K-Ar	44.0794	-115.658	Idaho	Criss, R E; Taylor, Hugh P, Jr
RH 43c	60.1	Unknown	K-Ar	43.8147	-115.358	Idaho	Criss, R E; Taylor, Hugh P, Jr
RH 95	53.4	Unknown	K-Ar	43.61	-115.149	Idaho	Criss, R E; Taylor, Hugh P, Jr
RH 99	53.9	Unknown	K-Ar	43.6228	-115.256	Idaho	Criss, R E; Taylor, Hugh P, Jr
RK 28a	59.8	Unknown	K-Ar	44.1053	-115.45	Idaho	Criss, R E; Taylor, Hugh P, Jr
787-20E	52.6	Unknown	Ar-Ar	46.0817	-115.142	Idaho	Criss, Robert E; Fleck, Robert J
787-25B	51.1	Unknown	Ar-Ar	46.08	-114.973	Idaho	Criss, Robert E; Fleck, Robert J
797-25D	59.8	Unknown	K-Ar	46.1367	-115.752	Idaho	Criss, Robert E; Fleck, Robert J
797-26E	79.2	Unknown	K-Ar	45.8417	-115.998	Idaho	Criss, Robert E; Fleck, Robert J
797-26I	75.1	Unknown	K-Ar	45.8267	-115.902	Idaho	Criss, Robert E; Fleck, Robert J
807-28D	78	Unknown	K-Ar	45.8033	-115.977	Idaho	Criss, Robert E; Fleck, Robert J
818-12D	56.2	Unknown	K-Ar	46.245	-115.777	Idaho	Criss, Robert E; Fleck, Robert J
818-15D	81.1	Unknown	K-Ar	45.63	-116.075	Idaho	Criss, Robert E; Fleck, Robert J
818-16D	81.3	Unknown	K-Ar	45.4183	-116.17	Idaho	Criss, Robert E; Fleck, Robert J
818-16E	80.5	Unknown	K-Ar	45.4267	-116.135	Idaho	Criss, Robert E; Fleck, Robert J
818-16I	76.6	Unknown	K-Ar	45.4233	-116.042	Idaho	Criss, Robert E; Fleck, Robert J
818-16J	76.8	Unknown	K-Ar	45.4533	-116.987	Oregon	Criss, Robert E; Fleck, Robert J
827-29F	78.4	Unknown	K-Ar	45.6283	-116.015	Idaho	Criss, Robert E; Fleck, Robert J
827-29J	82.2	Unknown	K-Ar	45.4283	-116.143	Idaho	Criss, Robert E; Fleck, Robert J
837-27I	50.46	Unknown	K-Ar	46.42	-115.415	Idaho	Criss, Robert E; Fleck, Robert J
837-28C	76.02	Unknown	K-Ar	45.98	-115.873	Idaho	Criss, Robert E; Fleck, Robert J
837-28F	78.36	Unknown	K-Ar	45.9633	-115.91	Idaho	Criss, Robert E; Fleck, Robert J
60	131		K-Ar	40.4698	-122.591	California and Oregon	Curtis et al, 1958; Evernden and Kistler, 1970
11741	60.7	4.2	K-Ar	54.1832	-126.252	British Columbia	Cyr, J.B.
11414	60	6.4	K-Ar	54.1832	-126.252	British Columbia	Cyr, J.B., Pease, R.B., and Schroeter, T.G.
DEL 6-70	50	Unknown	K-Ar	30.33	-109.57	Sonora	Damon, et. al.
UAKA 74-151	59.6	Unknown	K-Ar	29.87	-109.45	Sonora	Damon, et. al.
UAKA 80-07	61.2	Unknown	K-Ar	28.62	-109.89	Sonora	Damon, et. al.
UAKA 80-20	66.7	Unknown	K-Ar	28.84	-110.21	Sonora	Damon, et. al.
f11	136		K-Ar	41.0297	-122.96	California	Davis et al., 1965
Db04-05	84		Ar-Ar	37.0967	-118.553	Sierra Nevada	Davis et al., 2012
Db05-04	85.6		Ar-Ar	37.0882	-118.57	Sierra Nevada	Davis et al., 2012
Dbk05-01	87.5		Ar-Ar	37.1136	-118.541	Sierra Nevada	Davis et al., 2012
Kle07-05	83.1		Ar-Ar	37.2691	-118.778	Sierra Nevada	Davis et al., 2012
Km07-06	82.1		Ar-Ar	37.3452	-118.74	Sierra Nevada	Davis et al., 2012
Ms07-F8	83.8		Ar-Ar	36.9087	-118.376	Sierra Nevada	Davis et al., 2012
43	133		K-Ar	40.9862	-122.891	California and Oregon	Davis, 1961
42	133		K-Ar	41.0128	-122.934	California and Oregon	Davis, 1961; Evernden and Kistler, 1970
Jtrm06-02	85.1		Ar-Ar	36.7182	-118.37	Sierra Nevada	Davis, 2010
Kb06-02	87.6		Ar-Ar	36.757	-118.4	Sierra Nevada	Davis, 2010
Pcp07-07	79.5		Ar-Ar	37.352	-118.733	Sierra Nevada	Davis, 2010
Pp02-12	86		Ar-Ar	36.6941	-118.372	Sierra Nevada	Davis, 2010
S-21	87.7		Ar-Ar	37.1707	-118.973	Sierra Nevada	Davis, 2010
Wp03-07	84.3		Ar-Ar	36.6773	-118.383	Sierra Nevada	Davis, 2010
10158	106	4	K-Ar	59.9298	-130.435	British Columbia	Dawson, K.
MZP-12	80.7		Ar-Ar	35.4168	-116.1		DeWitt et al 1984
PCP-1	108.2		Ar-Ar	35.3834	-116		DeWitt et al 1984
PCP-10	128.3		Ar-Ar	35.3501	-115.96		DeWitt et al 1984
PCP-11	98.6		Ar-Ar	35.3834	-116.017		DeWitt et al 1984
PCP-13	90.4		Ar-Ar	35.4167	-115.933		DeWitt et al 1984
PCP-4	99.2		Ar-Ar	35.3501	-115.967		DeWitt et al 1984
81P120	79.8	2.8	K-Ar	45.9028	-112.011	Montana	DeWitt et al 1996
88GS-8	76.36	0.7	Ar-Ar	42.718	-111.896	Montana	DeWitt et al 1996
10009	52.4	1.8	K-Ar	59.3596	-137.639	British Columbia	Dodds, C.J. and Campbell, R.B.
10010	149	5	K-Ar	59.723	-138.22	British Columbia	Dodds, C.J. and Campbell, R.B.
10047	142	5	K-Ar	59.9867	-137.946	British Columbia	Dodds, C.J. and Campbell, R.B.
10084	136	5	K-Ar	59.5447	-137.52	British Columbia	Dodds, C.J. and Campbell, R.B.
10103	67.9	2.7	K-Ar	59.8513	-136.367	British Columbia	Dodds, C.J. and Campbell, R.B.
LE-1104	100.6		K-Ar	37.7633	-119.775	Sierra Nevada	Dodge and Calk, 1986
12897	52.4	3.6	K-Ar	49.4752	-119.648	British Columbia	Dostal, J., Breitsprecher, K., Church, B.N., Thorkelson, D.J. and Hamilton, T.S.
11786	52	1	Ar-Ar	54.1887	-126.255	British Columbia	Dostal, J., Church, B.N., Reynolds, P.H. and Hopkinson, L.
11787	99	2	Ar-Ar	54.0832	-126.418	British Columbia	Dostal, J., Church, B.N., Reynolds, P.H. and Hopkinson, L.
11430	85	4	K-Ar	52.4999	-122.268	British Columbia	Drummond, A.D., Sutherland Brown, A., Young, R.J. and Tennant, S.J.
0I068	78.4		K-Ar	36.3911	-118.076	Sierra Nevada	du Bray and Dellinger, 1988
0I069	75.3		K-Ar	36.2908	-118.334	Sierra Nevada	du Bray and Dellinger, 1988
0I098	80.3		K-Ar	36.2058	-118.458	Sierra Nevada	du Bray and Dellinger, 1988
0I100	73.5		K-Ar	36.8433	-118.32	Sierra Nevada	du Bray and Dellinger, 1988
0I116	81.4		K-Ar	37.3842	-118.759	Sierra Nevada	du Bray and Dellinger, 1988
0I118	81.8		K-Ar	37.1011	-118.763	Sierra Nevada	du Bray and Dellinger, 1988
0I120	89.7		K-Ar	36.3547	-118.573	Sierra Nevada	du Bray and Dellinger, 1988
0I133	78.2		K-Ar	37.3842	-118.759	Sierra Nevada	du Bray and Dellinger, 1988
0I211	69.5		K-Ar	37.0836	-118.451	Sierra Nevada	du Bray and Dellinger, 1988
0I212	81.1		K-Ar	36.2136	-118.264	Sierra Nevada	du Bray and Dellinger, 1988
0I213	76.5		K-Ar	37.2517	-118.826	Sierra Nevada	du Bray and Dellinger, 1988
0I329	76		K-Ar	37.2517	-118.826	Sierra Nevada	du Bray and Dellinger, 1988
0I330	75.6		K-Ar	36.3911	-118.076	Sierra Nevada	du Bray and Dellinger, 1988
0I332	82		K-Ar	36.9125	-118.863	Sierra Nevada	du Bray and Dellinger, 1988
0I334	80.3		K-Ar	36.2136	-118.264	Sierra Nevada	du Bray and Dellinger, 1988
0I335	80.7		K-Ar	36.2058	-118.458	Sierra Nevada	du Bray and Dellinger, 1988
0I427	76.3		K-Ar	37.2517	-118.826	Sierra Nevada	du Bray and Dellinger, 1988
0I429	72.5		K-Ar	36.8433	-118.32	Sierra Nevada	du Bray and Dellinger, 1988
0I619	68.9		K-Ar	37.0836	-118.451	Sierra Nevada	du Bray and Dellinger, 1988
0I620	96.2		K-Ar	36.3547	-118.573	Sierra Nevada	du Bray and Dellinger, 1988
0I623	80		K-Ar	37.1011	-118.763	Sierra Nevada	du Bray and Dellinger, 1988
0I624	72.5		K-Ar	36.9092	-118.341	Sierra Nevada	du Bray and Dellinger, 1988
0I642	79		K-Ar	36.8886	-118.346	Sierra Nevada	du Bray and Dellinger, 1988
0I643	88.5		K-Ar	36.3547	-118.573	Sierra Nevada	du Bray and Dellinger, 1988
0I644	80.8		K-Ar	37.1011	-118.763	Sierra Nevada	du Bray and Dellinger, 1988
0I660	83		K-Ar	36.8978	-118.356	Sierra Nevada	du Bray and Dellinger, 1988
0I686	83.9		K-Ar	36.2136	-118.264	Sierra Nevada	du Bray and Dellinger, 1988
9I114	81.6		K-Ar	37.2517	-118.826	Sierra Nevada	du Bray and Dellinger, 1988
9I139	88.9		K-Ar	37.3842	-118.759	Sierra Nevada	du Bray and Dellinger, 1988
9I162	80.9		K-Ar	36.8886	-118.346	Sierra Nevada	du Bray and Dellinger, 1988
9I177	83.4		K-Ar	37.0433	-118.744	Sierra Nevada	du Bray and Dellinger, 1988
9I210	85.7		K-Ar	36.9092	-118.874	Sierra Nevada	du Bray and Dellinger, 1988
9I220	83.1		K-Ar	36.9981	-118.362	Sierra Nevada	du Bray and Dellinger, 1988
9I221	83.7		K-Ar	37.5278	-118.758	Sierra Nevada	du Bray and Dellinger, 1988
9I223	77.6		K-Ar	36.9125	-118.379	Sierra Nevada	du Bray and Dellinger, 1988
9I365	79.7		K-Ar	37.4817	-118.756	Sierra Nevada	du Bray and Dellinger, 1988
9I366	81.7		K-Ar	37.2886	-118.904	Sierra Nevada	du Bray and Dellinger, 1988
9I375	77.2		K-Ar	36.9364	-118.362	Sierra Nevada	du Bray and Dellinger, 1988
9I379	82.1		K-Ar	37.3022	-118.896	Sierra Nevada	du Bray and Dellinger, 1988
9I453	87.9		K-Ar	36.9864	-118.382	Sierra Nevada	du Bray and Dellinger, 1988
9I454	77.1		K-Ar	36.8978	-118.356	Sierra Nevada	du Bray and Dellinger, 1988
9I457	79.8		K-Ar	36.8911	-118.341	Sierra Nevada	du Bray and Dellinger, 1988
9I611	85.1		K-Ar	36.1761	-118.371	Sierra Nevada	du Bray and Dellinger, 1988
9I612	83.4		K-Ar	36.9125	-118.862	Sierra Nevada	du Bray and Dellinger, 1988
9I657	81.8		K-Ar	37.043	-118.744	Sierra Nevada	du Bray and Dellinger, 1988
13045	60	4	K-Ar	49.5833	-117.218	British Columbia	Duncan, I.J.
10067	103	8	K-Ar	56.0899	-125.915	British Columbia	Eadie, E.T.
10069	177	12	K-Ar	56.1449	-125.603	British Columbia	Eadie, E.T.
10070	114	8	K-Ar	56.3232	-125.892	British Columbia	Eadie, E.T.
1	96	Unknown	K-Ar	40.4	-118.5	Nevada	Elison-Mark-W; Speed-Robert-C; Kistler-Ronald-W
NS13-79	70.9	Unknown	K-Ar	40.0444	-118.011	Nevada	Elison-Mark-W; Speed-Robert-C; Kistler-Ronald-W
NS7-70	159	Unknown	K-Ar	40.0111	-117.281	Nevada	Elison-Mark-W; Speed-Robert-C; Kistler-Ronald-W
NV63-1	76	Unknown	K-Ar	39.2228	-118.355	Nevada	Elison-Mark-W; Speed-Robert-C; Kistler-Ronald-W
NV72-26	161	Unknown	K-Ar	39.4897	-117.054	Nevada	Elison-Mark-W; Speed-Robert-C; Kistler-Ronald-W
NV72-38	78.3	Unknown	K-Ar	38.6517	-116.964	Nevada	Elison-Mark-W; Speed-Robert-C; Kistler-Ronald-W
NV76-18	92.1	Unknown	K-Ar	41.15	-117.281	Nevada	Elison-Mark-W; Speed-Robert-C; Kistler-Ronald-W
P4K1	134	Unknown	K-Ar	40.5667	-117.85	Nevada	Elison-Mark-W; Speed-Robert-C; Kistler-Ronald-W
P4K11	134	Unknown	K-Ar	40.5667	-117.85	Nevada	Elison-Mark-W; Speed-Robert-C; Kistler-Ronald-W
P4K12	134	Unknown	K-Ar	40.5667	-117.85	Nevada	Elison-Mark-W; Speed-Robert-C; Kistler-Ronald-W
P4K5	134	Unknown	K-Ar	40.5667	-117.85	Nevada	Elison-Mark-W; Speed-Robert-C; Kistler-Ronald-W
P4K6	134	Unknown	K-Ar	40.5667	-117.85	Nevada	Elison-Mark-W; Speed-Robert-C; Kistler-Ronald-W
P4K7	134	Unknown	K-Ar	40.5667	-117.85	Nevada	Elison-Mark-W; Speed-Robert-C; Kistler-Ronald-W
P4K8	134	Unknown	K-Ar	40.5667	-117.85	Nevada	Elison-Mark-W; Speed-Robert-C; Kistler-Ronald-W
RCS11A-78	106	Unknown	K-Ar	39.71	-117.857	Nevada	Elison-Mark-W; Speed-Robert-C; Kistler-Ronald-W
RCS11B-78	86.9	Unknown	K-Ar	39.675	-117.717	Nevada	Elison-Mark-W; Speed-Robert-C; Kistler-Ronald-W
RCS11D-78	77.8	Unknown	K-Ar	39.9083	-118.633	Nevada	Elison-Mark-W; Speed-Robert-C; Kistler-Ronald-W
1	143.5		K-Ar	41.3536	-122.969	Sierra Nevada	Evernden and Kistler, 1970
2	141		K-Ar	41.3106	-122.973	Sierra Nevada	Evernden and Kistler, 1970
3	130		K-Ar	41.1603	-122.968	Sierra Nevada	Evernden and Kistler, 1970
4	130		K-Ar	40.9942	-122.918	Sierra Nevada	Evernden and Kistler, 1970
5	123		K-Ar	40.5775	-120.737	Sierra Nevada	Evernden and Kistler, 1970
6	121		K-Ar	40.5786	-120.717	Sierra Nevada	Evernden and Kistler, 1970
7	97.4		K-Ar	40.2622	-120.527	Sierra Nevada	Evernden and Kistler, 1970
8	99.9		K-Ar	40.2442	-121.517	Sierra Nevada	Evernden and Kistler, 1970
9	101		K-Ar	40.1178	-120.478	Sierra Nevada	Evernden and Kistler, 1970
10	128		K-Ar	39.8978	-121.354	Sierra Nevada	Evernden and Kistler, 1970
11	132		K-Ar	39.9708	-121.277	Sierra Nevada	Evernden and Kistler, 1970
12	126		K-Ar	39.7597	-121.643	Sierra Nevada	Evernden and Kistler, 1970
13	129		K-Ar	39.8289	-121.405	Sierra Nevada	Evernden and Kistler, 1970
15	105		K-Ar	39.8686	-120.402	Sierra Nevada	Evernden and Kistler, 1970
16	99		K-Ar	39.6206	-120.475	Sierra Nevada	Evernden and Kistler, 1970
17	96.7		K-Ar	39.3183	-120.315	Sierra Nevada	Evernden and Kistler, 1970
18	143		K-Ar	39.375	-121.083	Sierra Nevada	Evernden and Kistler, 1970
19	153		K-Ar	39.6167	-120.452	Sierra Nevada	Evernden and Kistler, 1970
20	87.8		K-Ar	39.7919	-120.107	Sierra Nevada	Evernden and Kistler, 1970
21	81.9		K-Ar	38.6256	-119.541	Sierra Nevada	Evernden and Kistler, 1970
22	87.8		K-Ar	38.8664	-120.078	Sierra Nevada	Evernden and Kistler, 1970
23	86.1		K-Ar	38.9769	-119.888	Sierra Nevada	Evernden and Kistler, 1970
24	83.5		K-Ar	38.9644	-119.85	Sierra Nevada	Evernden and Kistler, 1970
25	87.3		K-Ar	38.7853	-119.881	Sierra Nevada	Evernden and Kistler, 1970
26	91.7		K-Ar	38.615	-120.223	Sierra Nevada	Evernden and Kistler, 1970
27	94.3		K-Ar	38.7056	-120.098	Sierra Nevada	Evernden and Kistler, 1970
28	88.7		K-Ar	38.6947	-119.738	Sierra Nevada	Evernden and Kistler, 1970
29	89.4		K-Ar	38.4878	-119.984	Sierra Nevada	Evernden and Kistler, 1970
30	81.8		K-Ar	38.5822	-119.799	Sierra Nevada	Evernden and Kistler, 1970
31	82.5		K-Ar	38.5958	-119.695	Sierra Nevada	Evernden and Kistler, 1970
32	81.7		K-Ar	38.4292	-119.747	Sierra Nevada	Evernden and Kistler, 1970
33	84.3		K-Ar	38.3408	-119.824	Sierra Nevada	Evernden and Kistler, 1970
34	83.3		K-Ar	38.3636	-119.87	Sierra Nevada	Evernden and Kistler, 1970
35	87		K-Ar	38.3264	-119.919	Sierra Nevada	Evernden and Kistler, 1970
36	88.7		K-Ar	38.2847	-119.966	Sierra Nevada	Evernden and Kistler, 1970
37	94.2		K-Ar	38.1997	-120.002	Sierra Nevada	Evernden and Kistler, 1970
38	84.8		K-Ar	37.8247	-119.501	Sierra Nevada	Evernden and Kistler, 1970
39	82.8		K-Ar	38.3817	-119.869	Sierra Nevada	Evernden and Kistler, 1970
40	84.2		K-Ar	38.4161	-119.833	Sierra Nevada	Evernden and Kistler, 1970
41	85.6		K-Ar	38.4181	-119.83	Sierra Nevada	Evernden and Kistler, 1970
42	81.7		K-Ar	38.4458	-119.67	Sierra Nevada	Evernden and Kistler, 1970
43	81.1		K-Ar	38.4253	-119.705	Sierra Nevada	Evernden and Kistler, 1970
44	79.5		K-Ar	38.3989	-119.607	Sierra Nevada	Evernden and Kistler, 1970
45	81		K-Ar	38.1233	-119.427	Sierra Nevada	Evernden and Kistler, 1970
46	81.4		K-Ar	38.1256	-119.436	Sierra Nevada	Evernden and Kistler, 1970
47	80.2		K-Ar	38.1483	-119.427	Sierra Nevada	Evernden and Kistler, 1970
48	80.1		K-Ar	38.1483	-119.389	Sierra Nevada	Evernden and Kistler, 1970
49	81.4		K-Ar	38.1711	-119.517	Sierra Nevada	Evernden and Kistler, 1970
50	138		K-Ar	38.0717	-120.179	Sierra Nevada	Evernden and Kistler, 1970
51	125		K-Ar	38.3006	-120.277	Sierra Nevada	Evernden and Kistler, 1970
52	96		K-Ar	38.3878	-120.184	Sierra Nevada	Evernden and Kistler, 1970
53	145		K-Ar	38.2169	-120.37	Sierra Nevada	Evernden and Kistler, 1970
54	92.8		K-Ar	38.7839	-120.215	Sierra Nevada	Evernden and Kistler, 1970
55	93.7		K-Ar	38.8056	-120.122	Sierra Nevada	Evernden and Kistler, 1970
56	102		K-Ar	38.7639	-120.327	Sierra Nevada	Evernden and Kistler, 1970
57	119		K-Ar	38.4514	-119.458	Sierra Nevada	Evernden and Kistler, 1970
58	108		K-Ar	38.7708	-120.384	Sierra Nevada	Evernden and Kistler, 1970
59	117		K-Ar	38.7731	-120.429	Sierra Nevada	Evernden and Kistler, 1970
61	89.1		K-Ar	38.4167	-120.45	Sierra Nevada	Evernden and Kistler, 1970
62	93.3		K-Ar	37.6953	-119.725	Sierra Nevada	Evernden and Kistler, 1970
63	92.9		K-Ar	37.7097	-119.721	Sierra Nevada	Evernden and Kistler, 1970
64	90		K-Ar	37.7236	-119.714	Sierra Nevada	Evernden and Kistler, 1970
65	170		K-Ar	37.3728	-117.977	Sierra Nevada	Evernden and Kistler, 1970
66	77.9		K-Ar	37.0225	-118.11	Sierra Nevada	Evernden and Kistler, 1970
67	155		K-Ar	37.3856	-117.73	Sierra Nevada	Evernden and Kistler, 1970
68	162		K-Ar	37.4267	-117.897	Sierra Nevada	Evernden and Kistler, 1970
69	83.1		K-Ar	37.85	-119.446	Sierra Nevada	Evernden and Kistler, 1970
70	84		K-Ar	37.8522	-119.444	Sierra Nevada	Evernden and Kistler, 1970
71	84.6		K-Ar	37.8761	-119.394	Sierra Nevada	Evernden and Kistler, 1970
72	83.7		K-Ar	37.795	-119.395	Sierra Nevada	Evernden and Kistler, 1970
73	83.6		K-Ar	37.7572	-119.395	Sierra Nevada	Evernden and Kistler, 1970
74	83.2		K-Ar	37.8536	-119.297	Sierra Nevada	Evernden and Kistler, 1970
75	82.5		K-Ar	37.8622	-119.297	Sierra Nevada	Evernden and Kistler, 1970
76	79.1		K-Ar	37.4542	-118.839	Sierra Nevada	Evernden and Kistler, 1970
77	78.1		K-Ar	37.435	-118.835	Sierra Nevada	Evernden and Kistler, 1970
78	78.8		K-Ar	37.4189	-118.768	Sierra Nevada	Evernden and Kistler, 1970
79	80.1		K-Ar	37.0439	-118.528	Sierra Nevada	Evernden and Kistler, 1970
80	80.1		K-Ar	37.0531	-118.579	Sierra Nevada	Evernden and Kistler, 1970
81	78.7		K-Ar	37.6542	-119.091	Sierra Nevada	Evernden and Kistler, 1970
82	77.4		K-Ar	37.6528	-119.091	Sierra Nevada	Evernden and Kistler, 1970
83	79.6		K-Ar	37.3408	-118.766	Sierra Nevada	Evernden and Kistler, 1970
84	82.4		K-Ar	37.8781	-119.344	Sierra Nevada	Evernden and Kistler, 1970
85	83.8		K-Ar	37.1531	-118.714	Sierra Nevada	Evernden and Kistler, 1970
86	82.5		K-Ar	37.1911	-119.667	Sierra Nevada	Evernden and Kistler, 1970
87	97.7		K-Ar	37.2958	-119.531	Sierra Nevada	Evernden and Kistler, 1970
88	104		K-Ar	37.3181	-119.656	Sierra Nevada	Evernden and Kistler, 1970
89	152		K-Ar	37.9792	-120.334	Sierra Nevada	Evernden and Kistler, 1970
90	144		K-Ar	37.9914	-120.277	Sierra Nevada	Evernden and Kistler, 1970
93	107		K-Ar	37.1069	-119.743	Sierra Nevada	Evernden and Kistler, 1970
94	82.1		K-Ar	36.7742	-118.381	Sierra Nevada	Evernden and Kistler, 1970
95	88.5		K-Ar	36.0542	-118.54	Sierra Nevada	Evernden and Kistler, 1970
96	87.5		K-Ar	36.1258	-118.556	Sierra Nevada	Evernden and Kistler, 1970
97	88.2		K-Ar	36.1508	-118.582	Sierra Nevada	Evernden and Kistler, 1970
98	91.5		K-Ar	36.1533	-118.244	Sierra Nevada	Evernden and Kistler, 1970
99	81.8		K-Ar	36.5956	-118.103	Sierra Nevada	Evernden and Kistler, 1970
100	79.1		K-Ar	36.5861	-118.242	Sierra Nevada	Evernden and Kistler, 1970
101	79.8		K-Ar	36.2861	-118.139	Sierra Nevada	Evernden and Kistler, 1970
102	80.5		K-Ar	36.4178	-118.273	Sierra Nevada	Evernden and Kistler, 1970
103	78.4		K-Ar	36.5844	-118.402	Sierra Nevada	Evernden and Kistler, 1970
104	81.8		K-Ar	36.5736	-118.318	Sierra Nevada	Evernden and Kistler, 1970
105	79.6		K-Ar	36.6522	-118.367	Sierra Nevada	Evernden and Kistler, 1970
106	81.7		K-Ar	36.5594	-118.291	Sierra Nevada	Evernden and Kistler, 1970
107	79.3		K-Ar	36.5672	-118.268	Sierra Nevada	Evernden and Kistler, 1970
108	80.1		K-Ar	36.5928	-118.222	Sierra Nevada	Evernden and Kistler, 1970
109	91.7		K-Ar	36.4514	-118.797	Sierra Nevada	Evernden and Kistler, 1970
110	92.6		K-Ar	36.4489	-118.773	Sierra Nevada	Evernden and Kistler, 1970
111	82.7		K-Ar	36.4317	-118.755	Sierra Nevada	Evernden and Kistler, 1970
112	87.4		K-Ar	36.4389	-118.739	Sierra Nevada	Evernden and Kistler, 1970
113	88.5		K-Ar	36.4414	-118.72	Sierra Nevada	Evernden and Kistler, 1970
114	88.9		K-Ar	36.4633	-118.632	Sierra Nevada	Evernden and Kistler, 1970
115	91.9		K-Ar	36.4561	-118.556	Sierra Nevada	Evernden and Kistler, 1970
116	87.4		K-Ar	36.4633	-118.546	Sierra Nevada	Evernden and Kistler, 1970
117	88.3		K-Ar	36.4603	-118.562	Sierra Nevada	Evernden and Kistler, 1970
118	93.5		K-Ar	36.4431	-118.904	Sierra Nevada	Evernden and Kistler, 1970
119	103		K-Ar	36.3925	-118.965	Sierra Nevada	Evernden and Kistler, 1970
120	114		K-Ar	36.2958	-119.078	Sierra Nevada	Evernden and Kistler, 1970
121	84.7		K-Ar	35.8294	-118.481	Sierra Nevada	Evernden and Kistler, 1970
124	102		K-Ar	35.7433	-118.903	Sierra Nevada	Evernden and Kistler, 1970
125	98		K-Ar	35.7158	-118.816	Sierra Nevada	Evernden and Kistler, 1970
126	86.6		K-Ar	35.7328	-118.391	Sierra Nevada	Evernden and Kistler, 1970
127	89.7		K-Ar	35.9886	-118.496	Sierra Nevada	Evernden and Kistler, 1970
128	98.2		K-Ar	35.7058	-118.754	Sierra Nevada	Evernden and Kistler, 1970
129	92.3		K-Ar	35.7381	-118.649	Sierra Nevada	Evernden and Kistler, 1970
130	90.6		K-Ar	35.7475	-118.587	Sierra Nevada	Evernden and Kistler, 1970
131	87.7		K-Ar	35.7333	-118.548	Sierra Nevada	Evernden and Kistler, 1970
132	85.5		K-Ar	35.6939	-118.497	Sierra Nevada	Evernden and Kistler, 1970
133	87		K-Ar	35.6567	-118.485	Sierra Nevada	Evernden and Kistler, 1970
134	85.1		K-Ar	35.6514	-118.415	Sierra Nevada	Evernden and Kistler, 1970
135	79.2		K-Ar	35.6567	-118.321	Sierra Nevada	Evernden and Kistler, 1970
136	78.7		K-Ar	35.6967	-118.214	Sierra Nevada	Evernden and Kistler, 1970
137	78.2		K-Ar	35.7294	-118.167	Sierra Nevada	Evernden and Kistler, 1970
139	74		K-Ar	35.6958	-118.055	Sierra Nevada	Evernden and Kistler, 1970
140	81.2		K-Ar	35.2119	-118.545	Sierra Nevada	Evernden and Kistler, 1970
141	80.4		K-Ar	35.0264	-118.347	Sierra Nevada	Evernden and Kistler, 1970
142	86.1		K-Ar	34.8969	-118.917	Sierra Nevada	Evernden and Kistler, 1970
147	76.9		K-Ar	34.8244	-118.991	Sierra Nevada	Evernden and Kistler, 1970
167	87.4		K-Ar	37.29	-119.7	Sierra Nevada	Evernden and Kistler, 1970
209	83.7		K-Ar	37.9528	-119.235	Sierra Nevada	Evernden and Kistler, 1970
210	84.8		K-Ar	37.9528	-119.235	Sierra Nevada	Evernden and Kistler, 1970
211	93.9		K-Ar	37.9306	-119.242	Sierra Nevada	Evernden and Kistler, 1970
212	83.2		K-Ar	37.9531	-119.235	Sierra Nevada	Evernden and Kistler, 1970
213	99		K-Ar	37.9611	-119.208	Sierra Nevada	Evernden and Kistler, 1970
214	82		K-Ar	37.9667	-119.206	Sierra Nevada	Evernden and Kistler, 1970
215	89.6		K-Ar	37.9347	-119.167	Sierra Nevada	Evernden and Kistler, 1970
216	87.7		K-Ar	37.8583	-119.081	Sierra Nevada	Evernden and Kistler, 1970
217	87.9		K-Ar	37.7722	-119.083	Sierra Nevada	Evernden and Kistler, 1970
218	82.4		K-Ar	37.7806	-119.232	Sierra Nevada	Evernden and Kistler, 1970
219	69		K-Ar	37.7514	-119.167	Sierra Nevada	Evernden and Kistler, 1970
220	110		K-Ar	37.1069	-119.743	Sierra Nevada	Evernden and Kistler, 1970
221	80.3		K-Ar	37.2639	-118.763	Sierra Nevada	Evernden and Kistler, 1970
222	134		K-Ar	36.5611	-117.906	Sierra Nevada	Evernden and Kistler, 1970
225	156.7		K-Ar	36.9389	-118.336	Sierra Nevada	Evernden and Kistler, 1970
226	149.2		K-Ar	37.7847	-118.475	Sierra Nevada	Evernden and Kistler, 1970
227	153.5		K-Ar	37.7847	-118.474	Sierra Nevada	Evernden and Kistler, 1970
228	139.4		K-Ar	37.9306	-118.831	Sierra Nevada	Evernden and Kistler, 1970
233	93.8		K-Ar	38.6583	-118.518	Sierra Nevada	Evernden and Kistler, 1970
235	91.9		K-Ar	38.4381	-118.212	Sierra Nevada	Evernden and Kistler, 1970
236	75.4		K-Ar	38.4381	-118.784	Sierra Nevada	Evernden and Kistler, 1970
238	86.1		K-Ar	38.2722	-118.481	Sierra Nevada	Evernden and Kistler, 1970
15a	99		K-Ar	39.6106	-120.494	Sierra Nevada	Evernden and Kistler, 1970
31a	82.8		K-Ar	38.35	-119.652	Sierra Nevada	Evernden and Kistler, 1970
39a	82.7		K-Ar	38.2886	-119.718	Sierra Nevada	Evernden and Kistler, 1970
10692	52.4	3.6	K-Ar	55.6308	-124.869	British Columbia	Ferri, F., Melville, D.M., and Orchard, M.J.
10697	106	8	K-Ar	55.5196	-124.441	British Columbia	Ferri, F., Melville, D.M., and Orchard, M.J.
DC-10	64.5	1	Ar-Ar	48.0735	-115.62	Monatana	Filllipone and Yin, 1994
DC-26	56.7	0.1	Ar-Ar	48.0809	-115.669	Monatana	Filllipone and Yin, 1994
DC-45	52		Ar-Ar	48.1521	-115.68	Monatana	Filllipone and Yin, 1994
DC-57	71.4	0.9	Ar-Ar	48.0524	-115.66	Monatana	Filllipone and Yin, 1994
LC-34	71.4	0.7	Ar-Ar	48.3052	-115.839	Monatana	Filllipone and Yin, 1994
LDP-1	71		Ar-Ar	34.735	-115.085	California	Foster et al 1989
MG-1	71	1	Ar-Ar	34.495	-115.212	California	Foster et al 1989
PR-1	69		Ar-Ar	34.552	-115.104	California	Foster et al 1989
SW-1	68		Ar-Ar	34.641	-115.168	California	Foster et al 1989
W166A	69	1	Ar-Ar	34.592	-115.216	California	Foster et al 1989
W421R	69	1	Ar-Ar	34.406	-115.228	California	Foster et al 1989
81-142	57.8	1.4	Ar-Ar	34.587	-114.582	California	Foster et al 1990
CHM10	62.15	1.4	Ar-Ar	34.511	-114.622	California	Foster et al 1990
CLM2	132	9	Ar-Ar	34.796	-115.362	California	Foster et al 1990
CLMP1	87	1	Ar-Ar	34.753	-115.33	California	Foster et al 1990
MH16	59	4	Ar-Ar	34.594	-114.2	California	Foster et al 1990
MH6	62.3	1.5	Ar-Ar	34.596	-114.319	California	Foster et al 1990
SM1	132	1	Ar-Ar	34.515	-115.381	California	Foster et al 1990
STL1	73	1	Ar-Ar	34.69	-114.871	California	Foster et al 1990
TMJW1	124	1	Ar-Ar	34.251	-114.922	California	Foster et al 1990
BS1	75		Ar-Ar	34.711	-115.175	California	Foster et al 1992
EP18	174		Ar-Ar	34.722	-115.165	California	Foster et al 1992
FH1	72.4	0.3	Ar-Ar	34.85	-115.179	California	Foster et al 1992
GPI	71.9	0.3	Ar-Ar	34.906	-115.052	California	Foster et al 1992
JW87-82	72.2	1.1	Ar-Ar	34.76	-115.034	California	Foster et al 1992
PCR	68.5	1.8	Ar-Ar	34.912	-115.029	California	Foster et al 1992
PM17	72.3	0.3	Ar-Ar	34.734	-115.132	California	Foster et al 1992
PM24	71.6	1.4	Ar-Ar	34.733	-115.15	California	Foster et al 1992
DF02-113	53.7	1.4	Ar-Ar	46.0197	-112.984	Idaho	Foster et al 2010
DF02-114	76.3	1.1	Ar-Ar	46.0733	-112.939	Idaho	Foster et al 2010
SL-38	79	1.2	Ar-Ar	46.1017	-113.276	Idaho	Foster et al 2010
Ug-1	50.5	0.8	Ar-Ar	46.0756	-113.149	Idaho	Foster et al 2010
WG04-052	64.1	1	Ar-Ar	46.0858	-113.229	Idaho	Foster et al 2010
WG04-112	52.8	0.7	Ar-Ar	46.0572	-113.245	Idaho	Foster et al 2010
WG04-114	74	0.9	Ar-Ar	46.0736	-113.263	Idaho	Foster et al 2010
96-102	57.39	0.69	Ar-Ar	46.6617	-114.582	Monatana	Foster et al. 2001
81-142	57.8	1.4	Ar-Ar	34.6121	-114.56	Nevada	Foster, 1989
BS1	75.6		Ar-Ar	34.7154	-115.173	Nevada	Foster, 1989
CHM10	66.5	0.4	Ar-Ar	34.5515	-114.601	Nevada	Foster, 1989
CLM2	132	9	Ar-Ar	34.7885	-115.359	Nevada	Foster, 1989
EP15	174.2		Ar-Ar	34.7191	-115.166	Nevada	Foster, 1989
JW87-82	71.6		Ar-Ar	34.8005	-115.034	Nevada	Foster, 1989
LDP1	67.4		Ar-Ar	34.7256	-115.105	Nevada	Foster, 1989
MG1	68.8		Ar-Ar	34.4627	-115.205	Nevada	Foster, 1989
PM24	67.5		Ar-Ar	34.7379	-115.138	Nevada	Foster, 1989
PR1	68.1		Ar-Ar	34.5167	-115.118	Nevada	Foster, 1989
SM1	140	20	Ar-Ar	34.5286	-115.377	Nevada	Foster, 1989
SM5	132	1	Ar-Ar	34.5176	-115.387	Nevada	Foster, 1989
STL1	73	1	Ar-Ar	34.6844	-114.853	Nevada	Foster, 1989
SW1	68.5		Ar-Ar	34.5726	-115.193	Nevada	Foster, 1989
TMJW1	124	1	Ar-Ar	34.2248	-114.882	Nevada	Foster, 1989
W166A	68.7		Ar-Ar	34.5841	-115.265	Nevada	Foster, 1989
W412R	68.8		Ar-Ar	34.422	-115.243	Nevada	Foster, 1989
13053	50.3	3	K-Ar	49.0232	-119.376	British Columbia	Fox, K.F., Jr., Rinehart, C.D., Engels, J.C. and Stern, T.W.
14402	87.6	6.2	K-Ar	50.1932	-123.79	British Columbia	Friedman, R.M. and Armstrong, R.L.
14406	118	8	K-Ar	49.6532	-124.13	British Columbia	Friedman, R.M. and Armstrong, R.L.
14407	114	8	K-Ar	49.6448	-123.966	British Columbia	Friedman, R.M. and Armstrong, R.L.
14414	97.2	6.8	K-Ar	49.4732	-123.556	British Columbia	Friedman, R.M. and Armstrong, R.L.
14419	92.1	6.2	K-Ar	50.0515	-123.851	British Columbia	Friedman, R.M. and Armstrong, R.L.
14423	82.6	5.6	K-Ar	50.6815	-122.983	British Columbia	Friedman, R.M. and Armstrong, R.L.
14426	102	8	K-Ar	49.3748	-122.241	British Columbia	Friedman, R.M. and Armstrong, R.L.
14427	81.9	5.8	K-Ar	49.8582	-122.233	British Columbia	Friedman, R.M. and Armstrong, R.L.
13084	51.4	3	K-Ar	49.0994	-117.784	British Columbia	Fyles, J.T.
13085	50.4	2.8	K-Ar	49.1157	-117.794	British Columbia	Fyles, J.T.
13091	91.8	4.8	K-Ar	49.0716	-117.784	British Columbia	Fyles, J.T.
13094	59.8	3.6	K-Ar	49.0699	-117.801	British Columbia	Fyles, J.T.
13133	53.3	3.8	K-Ar	49.1049	-117.799	British Columbia	Fyles, J.T.
10635	114	3	K-Ar	57.0931	-126.275	British Columbia	Gabrielse, H., Loveridge, W.D., Sullivan, R.W. and Stevens, R.D.
10136	183	14	K-Ar	56.6165	-126.402	British Columbia	Gabrielse, H., Wanless, R.K., Armstrong, R.L. and Erdman, L.R.
11203	179	10	K-Ar	55.2499	-124.752	British Columbia	Garnett, J.A.
11204	178	10	K-Ar	55.9166	-125.318	British Columbia	Garnett, J.A.
11205	183	10	K-Ar	55.2499	-125.235	British Columbia	Garnett, J.A.
11206	193	10	K-Ar	55.1999	-124.893	British Columbia	Garnett, J.A.
11207	114	8	K-Ar	55.4166	-125.102	British Columbia	Garnett, J.A.
11208	88	6	K-Ar	55.6166	-124.852	British Columbia	Garnett, J.A.
11209	139	8	K-Ar	55.1016	-124.885	British Columbia	Garnett, J.A.
11210	123	8	K-Ar	55.4832	-125.235	British Columbia	Garnett, J.A.
11211	187	12	K-Ar	55.2749	-125.108	British Columbia	Garnett, J.A.
11212	178	10	K-Ar	55.9166	-125.435	British Columbia	Garnett, J.A.
11213	201	12	K-Ar	55.2882	-125.155	British Columbia	Garnett, J.A.
14362	64.36	0.34	Ar-Ar	50.7728	-122.663	British Columbia	Garver, J.I., Archibald, D.A. and van Order, W.F. Jr.
14363	62.86	1.79	Ar-Ar	50.7629	-122.681	British Columbia	Garver, J.I., Archibald, D.A. and van Order, W.F. Jr.
14365	91.35	0.21	Ar-Ar	50.9165	-123.018	British Columbia	Garver, J.I., Archibald, D.A. and van Order, W.F. Jr.
11BT-23	124.854	0.263	Ar-Ar	44.434	-117.529	Oregon	Gaschnig et al 2017
BT-19	124.886	0.334	Ar-Ar	44.4028	-117.653	Oregon	Gaschnig et al 2017
11564	132.6	0	Ar-Ar	52.6275	-120.214	British Columbia	Gerasimoff, M.D.
11565	122.3	0	Ar-Ar	52.537	-120.086	British Columbia	Gerasimoff, M.D.
11568	129.9	0	Ar-Ar	52.5671	-120.166	British Columbia	Gerasimoff, M.D.
11571	138.9	0	Ar-Ar	52.5461	-120.086	British Columbia	Gerasimoff, M.D.
8007A*	102	Unknown	K-Ar	49.0833	-117.042	British Columbia	Ghosh-Dipak-K
8038A*	89	Unknown	K-Ar	49.3333	-116.7	British Columbia	Ghosh-Dipak-K
8038E*	89	Unknown	K-Ar	49.35	-116.717	British Columbia	Ghosh-Dipak-K
8088C*	90	Unknown	K-Ar	49.8667	-116.85	British Columbia	Ghosh-Dipak-K
8096E*	89	Unknown	K-Ar	49.3833	-116.7	British Columbia	Ghosh-Dipak-K
Coldwater	215	Unknown	K-Ar	49.915	-120.853	British Columbia	Ghosh-Dipak-K
L89-1	204	Unknown	K-Ar	49.715	-120.612	British Columbia	Ghosh-Dipak-K
L89-23.5	50.3	Unknown	K-Ar	50.2167	-119.58	British Columbia	Ghosh-Dipak-K
L89-27	53	Unknown	K-Ar	49.37	-119.779	British Columbia	Ghosh-Dipak-K
L89-3	101	Unknown	K-Ar	49.3525	-120.473	British Columbia	Ghosh-Dipak-K
L89-4A	195	Unknown	K-Ar	49.3383	-120.517	British Columbia	Ghosh-Dipak-K
L89-4B	194	Unknown	K-Ar	49.3417	-120.5	British Columbia	Ghosh-Dipak-K
Shingle	52.4	Unknown	K-Ar	49.4667	-119.633	British Columbia	Ghosh-Dipak-K
14716	50.2	0.7	Ar-Ar	50.2923	-120.618	British Columbia	Ghosh, S.
14717	50.3	0.4	Ar-Ar	50.5397	-120.453	British Columbia	Ghosh, S.
14718	63.8	0.5	Ar-Ar	50.2174	-120.496	British Columbia	Ghosh, S.
14719	56.5	0.4	Ar-Ar	50.3253	-120.463	British Columbia	Ghosh, S.
14720	50.2	0.4	Ar-Ar	50.3291	-120.55	British Columbia	Ghosh, S.
14721	50.3	0.5	Ar-Ar	50.2829	-120.587	British Columbia	Ghosh, S.
11542	86.1	5.8	K-Ar	54.3749	-126.568	British Columbia	Godwin, C.I.
11543	57.6	4.4	K-Ar	54.1832	-126.885	British Columbia	Godwin, C.I.
11545	76.6	5.2	K-Ar	54.7832	-126.852	British Columbia	Godwin, C.I.
11546	60.3	4.2	K-Ar	54.9249	-127.152	British Columbia	Godwin, C.I.
11550	56.1	3.8	K-Ar	55.2832	-127.552	British Columbia	Godwin, C.I.
11551	67.3	4.6	K-Ar	55.2082	-127.693	British Columbia	Godwin, C.I.
11552	59	4	K-Ar	55.0415	-128.268	British Columbia	Godwin, C.I.
11555	77.6	5.2	K-Ar	55.3832	-127.76	British Columbia	Godwin, C.I.
11560	51.1	3.4	K-Ar	54.5665	-128.435	British Columbia	Godwin, C.I.
13758	186	12	K-Ar	51.3082	-121.11	British Columbia	Godwin, C.I.
11300	141	10	K-Ar	54.8499	-125.582	British Columbia	Godwin, C.I. and Cann, R.
11301	136	10	K-Ar	54.8599	-125.582	British Columbia	Godwin, C.I. and Cann, R.
13226	58.8	4	K-Ar	49.4399	-119.101	British Columbia	Godwin, C.I., Watson, P.H. and Shen, K.
13854	105	8	K-Ar	49.525	-120.951	British Columbia	Greig, C.J.
13872	55	3.8	K-Ar	49.6547	-121.005	British Columbia	Greig, C.J., Armstrong, R.L., Harakal, J.E., Runkle, D. and van der Heyden, P.
13874	96.5	6.8	K-Ar	49.61	-121.055	British Columbia	Greig, C.J., Armstrong, R.L., Harakal, J.E., Runkle, D. and van der Heyden, P.
13877	100	8	K-Ar	49.486	-120.955	British Columbia	Greig, C.J., Armstrong, R.L., Harakal, J.E., Runkle, D. and van der Heyden, P.
13885	97.8	6.8	K-Ar	49.734	-121.092	British Columbia	Greig, C.J., Armstrong, R.L., Harakal, J.E., Runkle, D. and van der Heyden, P.
13886	99.5	7	K-Ar	49.7044	-121.121	British Columbia	Greig, C.J., Armstrong, R.L., Harakal, J.E., Runkle, D. and van der Heyden, P.
13887	99.6	7	K-Ar	49.7265	-121.132	British Columbia	Greig, C.J., Armstrong, R.L., Harakal, J.E., Runkle, D. and van der Heyden, P.
13888	108	8	K-Ar	49.5652	-120.933	British Columbia	Greig, C.J., Armstrong, R.L., Harakal, J.E., Runkle, D. and van der Heyden, P.
13890	50.3	3.6	K-Ar	49.4557	-120.984	British Columbia	Greig, C.J., Armstrong, R.L., Harakal, J.E., Runkle, D. and van der Heyden, P.
13892	57.6	4	K-Ar	49.5298	-120.93	British Columbia	Greig, C.J., Armstrong, R.L., Harakal, J.E., Runkle, D. and van der Heyden, P.
14276	107	8	K-Ar	49.1093	-120.66	British Columbia	Greig, C.J., Armstrong, R.L., Harakal, J.E., Runkle, D. and van der Heyden, P.
10649	51.9	2.6	K-Ar	56.0988	-129.505	British Columbia	Greig, C.J., McNicoll, V.J., Anderson, R.G., Daubeny, P.H., Harakal, J.E. and Runkle, D.
10650	50.5	2.4	K-Ar	56.0592	-129.559	British Columbia	Greig, C.J., McNicoll, V.J., Anderson, R.G., Daubeny, P.H., Harakal, J.E. and Runkle, D.
9957	86.1		Ar-Ar	34.8702	-119.11	Sierra Nevada	Grove et al., 2003
11511	50.4	4	K-Ar	55.8998	-130.017	British Columbia	Grove, E.W.
14173	58.2	4	K-Ar	51.1332	-122.601	British Columbia	Grove, E.W.
14174	57.8	4	K-Ar	51.1332	-122.601	British Columbia	Grove, E.W.
e1	146	1	K-Ar	41.7965	-123.672	California	Hacker and Ernst, 1993
e5	148.4	1.2	Ar-Ar	42.0851	-123.823	Oregon	Harper et al., 1993
e5-2	149.7	1.6	Ar-Ar	42.0851	-123.823	Oregon	Harper et al., 1993
14758	165.1	1.6	Ar-Ar	59.7044	-133.717	British Columbia	Harris, M.J., Symons, D.T.A., Blackburn, W.H., Hart, C.J.R. and Villeneuve, M.
14759	165.3	1.6	Ar-Ar	59.6016	-133.671	British Columbia	Harris, M.J., Symons, D.T.A., Blackburn, W.H., Hart, C.J.R. and Villeneuve, M.
14760	161.8	1.6	Ar-Ar	59.663	-133.808	British Columbia	Harris, M.J., Symons, D.T.A., Blackburn, W.H., Hart, C.J.R. and Villeneuve, M.
11698	72.2	2.6	K-Ar	54.2302	-130.06	British Columbia	Harrison, T.M., Armstrong, R.L., Naeser, C.W. and Harakal, J.E.
84 WV	64.9	0.6	Ar-Ar	50.7422	-122.617	British Columbia	Hart et al. (2008) Gold, Granites, and Geolchrology: Timing of Formation of the Bralorne-Pioneer Gold Orebodies and the Bendor Batholith, Southwestern British Columbia
12187	51.1	3.6	K-Ar	54.4456	-128.96	British Columbia	Heah, T.S.T.
66	148.4	1.2	Ar-Ar	42.0517	-123.842	California	Heizler and Harrison, 1988
4H501	99.1		K-Ar	39.317	-120.324	Sierra Nevada	Hillhouse and Gromme, 2011
4H509	96		K-Ar	38.806	-120.121	Sierra Nevada	Hillhouse and Gromme, 2011
4H528	89.5		K-Ar	38.776	-119.919	Sierra Nevada	Hillhouse and Gromme, 2011
4H538	90.9		K-Ar	38.694	-119.987	Sierra Nevada	Hillhouse and Gromme, 2011
4H548	90.9		K-Ar	38.7	-119.986	Sierra Nevada	Hillhouse and Gromme, 2011
4H556	96.7		K-Ar	38.659	-120.132	Sierra Nevada	Hillhouse and Gromme, 2011
4H567	96.7		K-Ar	38.649	-120.132	Sierra Nevada	Hillhouse and Gromme, 2011
4H577	96.7		K-Ar	38.814	-120.015	Sierra Nevada	Hillhouse and Gromme, 2011
4H585	83.8		K-Ar	38.626	-119.91	Sierra Nevada	Hillhouse and Gromme, 2011
4H593	91.3		K-Ar	38.422	-120.088	Sierra Nevada	Hillhouse and Gromme, 2011
4H602	91.3		K-Ar	38.453	-120.055	Sierra Nevada	Hillhouse and Gromme, 2011
4H610	83.8		K-Ar	38.537	-119.903	Sierra Nevada	Hillhouse and Gromme, 2011
4H618	91.3		K-Ar	38.299	-119.947	Sierra Nevada	Hillhouse and Gromme, 2011
4H627	90.9		K-Ar	38.275	-119.977	Sierra Nevada	Hillhouse and Gromme, 2011
BVS	83.6		K-Ar	35.19	-118.52	Sierra Nevada	Hillhouse and Gromme, 2011
EDMON	88.3		K-Ar	34.97	-118.8	Sierra Nevada	Hillhouse and Gromme, 2011
GRCMD	85		K-Ar	38.124	-119.601	Sierra Nevada	Hillhouse and Gromme, 2011
KELSO	76.8		K-Ar	35.33	-118.23	Sierra Nevada	Hillhouse and Gromme, 2011
KERNC	88.9		K-Ar	35.53	-118.74	Sierra Nevada	Hillhouse and Gromme, 2011
MGIBC	85.3		K-Ar	38.032	-119.685	Sierra Nevada	Hillhouse and Gromme, 2011
MGIBF	93.5		K-Ar	38.032	-119.66	Sierra Nevada	Hillhouse and Gromme, 2011
MTG	87.7		K-Ar	37.33	-119.25	Sierra Nevada	Hillhouse and Gromme, 2011
10087	209	30	K-Ar	57.3165	-131.169	British Columbia	Holbek, P.M.
10088	236	18	K-Ar	57.4998	-131.052	British Columbia	Holbek, P.M.
10089	172	12	K-Ar	57.4165	-131.252	British Columbia	Holbek, P.M.
40	133		K-Ar	41.1436	-122.967	California and Oregon	Holdaway, 1963; Everndon and Kistler, 1970
2	132		K-Ar	40.6463	-122.776	California	Hotz, 1971
10	167		K-Ar	40.7775	-123.384	California	Hotz, 1971
13	165		K-Ar	41.0567	-123.638	California	Hotz, 1971
17	127		K-Ar	41.1737	-122.934	California	Hotz, 1971
21	127		K-Ar	40.9695	-122.913	California	Hotz, 1971
22	137		K-Ar	41.2925	-122.946	California	Hotz, 1971
23	140		K-Ar	41.3507	-122.963	California	Hotz, 1971
24	133		K-Ar	41.2112	-122.729	California	Hotz, 1971
25	136		K-Ar	41.1662	-122.748	California	Hotz, 1971
26.1	163		K-Ar	41.192	-122.337	California	Hotz, 1971
26.2	133		K-Ar	41.1799	-122.328	California	Hotz, 1971
26.3	158		K-Ar	41.1707	-122.346	California	Hotz, 1971
29	155		K-Ar	41.2212	-123.239	California	Hotz, 1971
32	154		K-Ar	41.5677	-123.661	California	Hotz, 1971
33	154		K-Ar	41.58	-123.686	California	Hotz, 1971
38	146		K-Ar	41.834	-122.685	California	Hotz, 1971
44	152		K-Ar	41.9112	-122.524	California	Hotz, 1971
46	144		K-Ar	42.1985	-122.725	Oregon	Hotz, 1971
47	147		K-Ar	41.9675	-122.563	California	Hotz, 1971
48	138		K-Ar	42.3503	-122.937	Oregon	Hotz, 1971
49	142		K-Ar	42.4457	-123.057	Oregon	Hotz, 1971
52	138		K-Ar	42.0654	-122.351	Oregon	Hotz, 1971
54	138		K-Ar	42.6802	-123.08	Oregon	Hotz, 1971
58	151		K-Ar	42.5503	-123.75	Oregon	Hotz, 1971
63	137		K-Ar	41.5533	-122.23	California and Oregon	Hotz, 1971
A	134		K-Ar	41.6327	-122.247	California	Hotz, 1971
B	147		K-Ar	41.8137	-123.255	California	Hotz, 1971
C	131		K-Ar	40.749	-122.699	California	Hotz, 1971
D	127		K-Ar	40.6026	-122.645	California	Hotz, 1971
13504	115	8	K-Ar	49.7708	-115.607	British Columbia	Hoy, T.
12935	105	12	K-Ar	49.5833	-115.751	British Columbia	Hunt, G.
10053	108.7	1.7	K-Ar	58.8914	-130.018	British Columbia	Hunt, P.A. and Roddick, J.C.
10157	167	3	K-Ar	59.5372	-133.591	British Columbia	Hunt, P.A. and Roddick, J.C.
10210	157.8	2.4	K-Ar	58.2712	-129.406	British Columbia	Hunt, P.A. and Roddick, J.C.
10211	266.5	3.9	K-Ar	58.9914	-129.227	British Columbia	Hunt, P.A. and Roddick, J.C.
10218	215	4	K-Ar	57.916	-127.955	British Columbia	Hunt, P.A. and Roddick, J.C.
10219	204	4	K-Ar	57.8895	-127.668	British Columbia	Hunt, P.A. and Roddick, J.C.
10221	208	4	K-Ar	57.8653	-127.874	British Columbia	Hunt, P.A. and Roddick, J.C.
10223	107.4	1.6	K-Ar	58.7748	-129.627	British Columbia	Hunt, P.A. and Roddick, J.C.
10224	106.1	1.6	K-Ar	58.7748	-129.627	British Columbia	Hunt, P.A. and Roddick, J.C.
10244	113.2	1.7	K-Ar	57.9665	-127.26	British Columbia	Hunt, P.A. and Roddick, J.C.
10257	111.2	1.7	K-Ar	58.7414	-129.618	British Columbia	Hunt, P.A. and Roddick, J.C.
10349	92	3	K-Ar	57.3455	-126.463	British Columbia	Hunt, P.A. and Roddick, J.C.
10550	107.2	2.2	K-Ar	58.8831	-129.352	British Columbia	Hunt, P.A. and Roddick, J.C.
10551	114.1	1.6	K-Ar	58.4053	-128.374	British Columbia	Hunt, P.A. and Roddick, J.C.
10552	110.1	1.8	K-Ar	58.5456	-128.102	British Columbia	Hunt, P.A. and Roddick, J.C.
10553	116.5	1.6	K-Ar	58.6831	-128.178	British Columbia	Hunt, P.A. and Roddick, J.C.
10554	108.8	1.9	K-Ar	58.7059	-129.068	British Columbia	Hunt, P.A. and Roddick, J.C.
10555	76.6	1.3	K-Ar	56.6519	-131.331	British Columbia	Hunt, P.A. and Roddick, J.C.
10556	52.8	1.2	K-Ar	56.3493	-130.577	British Columbia	Hunt, P.A. and Roddick, J.C.
10557	57.9	1.6	K-Ar	56.3495	-130.539	British Columbia	Hunt, P.A. and Roddick, J.C.
10559	50.7	0.8	K-Ar	56.8989	-131.831	British Columbia	Hunt, P.A. and Roddick, J.C.
10560	51.9	0.8	K-Ar	56.8623	-131.839	British Columbia	Hunt, P.A. and Roddick, J.C.
10561	159.1	2.4	K-Ar	56.8392	-131.685	British Columbia	Hunt, P.A. and Roddick, J.C.
10564	78.5	2.2	K-Ar	56.6519	-131.331	British Columbia	Hunt, P.A. and Roddick, J.C.
10569	62	1	K-Ar	59.7694	-134.934	British Columbia	Hunt, P.A. and Roddick, J.C.
10570	54	1	K-Ar	59.6786	-135.098	British Columbia	Hunt, P.A. and Roddick, J.C.
10571	103	2	K-Ar	59.0164	-129.793	British Columbia	Hunt, P.A. and Roddick, J.C.
10572	103	3	K-Ar	59.0331	-129.777	British Columbia	Hunt, P.A. and Roddick, J.C.
10573	116	3	K-Ar	58.9039	-130.057	British Columbia	Hunt, P.A. and Roddick, J.C.
11004	52.4	0.8	K-Ar	52.375	-118.643	British Columbia	Hunt, P.A. and Roddick, J.C.
11057	101	2	K-Ar	53.5083	-122.16	British Columbia	Hunt, P.A. and Roddick, J.C.
11058	98	3	K-Ar	53.3183	-122.316	British Columbia	Hunt, P.A. and Roddick, J.C.
11091	51.9	1.3	K-Ar	54.7381	-129.775	British Columbia	Hunt, P.A. and Roddick, J.C.
11092	50	2	K-Ar	53.1325	-126.913	British Columbia	Hunt, P.A. and Roddick, J.C.
11114	227	4	K-Ar	52.8347	-120.863	British Columbia	Hunt, P.A. and Roddick, J.C.
11129	64.2	2.7	K-Ar	54.8179	-127.299	British Columbia	Hunt, P.A. and Roddick, J.C.
12311	100.6	1.5	K-Ar	49.024	-120.108	British Columbia	Hunt, P.A. and Roddick, J.C.
12314	63.8	1.5	K-Ar	50.164	-121.712	British Columbia	Hunt, P.A. and Roddick, J.C.
12315	62.7	1.5	K-Ar	50.1702	-121.87	British Columbia	Hunt, P.A. and Roddick, J.C.
12316	79.5	1.8	K-Ar	50.1118	-122.001	British Columbia	Hunt, P.A. and Roddick, J.C.
12322	109	1.7	K-Ar	49.0485	-120.452	British Columbia	Hunt, P.A. and Roddick, J.C.
12328	161.8	2.4	K-Ar	50.3527	-120.194	British Columbia	Hunt, P.A. and Roddick, J.C.
12399	183.3	2.7	K-Ar	50.184	-120.289	British Columbia	Hunt, P.A. and Roddick, J.C.
12400	144.4	2.2	K-Ar	50.0374	-120.039	British Columbia	Hunt, P.A. and Roddick, J.C.
12402	186	4	K-Ar	50.1487	-121.357	British Columbia	Hunt, P.A. and Roddick, J.C.
12404	173	5	K-Ar	49.3819	-120.172	British Columbia	Hunt, P.A. and Roddick, J.C.
12405	149	2	K-Ar	49.6265	-120.36	British Columbia	Hunt, P.A. and Roddick, J.C.
12572	85	1	K-Ar	51.5448	-126.931	British Columbia	Hunt, P.A. and Roddick, J.C.
12573	67	1	K-Ar	51.9948	-126.895	British Columbia	Hunt, P.A. and Roddick, J.C.
12576	159	2	K-Ar	49.631	-119.06	British Columbia	Hunt, P.A. and Roddick, J.C.
12591	52	2	K-Ar	49.7179	-117.968	British Columbia	Hunt, P.A. and Roddick, J.C.
12594	55	3	K-Ar	51.5868	-118.969	British Columbia	Hunt, P.A. and Roddick, J.C.
12598	100.7	1.4	K-Ar	49.6032	-121.064	British Columbia	Hunt, P.A. and Roddick, J.C.
12601	80	1	K-Ar	49.7332	-121.604	British Columbia	Hunt, P.A. and Roddick, J.C.
12602	79	2	K-Ar	49.8693	-121.826	British Columbia	Hunt, P.A. and Roddick, J.C.
12604	108	1	K-Ar	49.8693	-121.198	British Columbia	Hunt, P.A. and Roddick, J.C.
12605	53	1	K-Ar	49.7901	-120.321	British Columbia	Hunt, P.A. and Roddick, J.C.
12606	53	1	K-Ar	49.7582	-120.083	British Columbia	Hunt, P.A. and Roddick, J.C.
12612	78	2	K-Ar	49.6607	-121.778	British Columbia	Hunt, P.A. and Roddick, J.C.
12614	78	1	K-Ar	49.3798	-121.644	British Columbia	Hunt, P.A. and Roddick, J.C.
12615	160	3	K-Ar	49.2673	-121.96	British Columbia	Hunt, P.A. and Roddick, J.C.
12617	51.8	1.4	K-Ar	49.4649	-118.561	British Columbia	Hunt, P.A. and Roddick, J.C.
12618	53.4	0.7	K-Ar	49.3082	-118.464	British Columbia	Hunt, P.A. and Roddick, J.C.
12619	50.8	0.7	K-Ar	49.4193	-118.519	British Columbia	Hunt, P.A. and Roddick, J.C.
12632	66.9	1.2	K-Ar	50.7783	-122.225	British Columbia	Hunt, P.A. and Roddick, J.C.
12663	56.3	2.5	K-Ar	49.6678	-118.889	British Columbia	Hunt, P.A. and Roddick, J.C.
12683	53.5	0.7	Ar-Ar	54.9081	-126.575	British Columbia	Hunt, P.A. and Roddick, J.C.
12684	103.7	1	Ar-Ar	51.7162	-127.75	British Columbia	Hunt, P.A. and Roddick, J.C.
12685	96.6	1	Ar-Ar	51.709	-127.633	British Columbia	Hunt, P.A. and Roddick, J.C.
12686	99.4	1	Ar-Ar	51.6974	-127.47	British Columbia	Hunt, P.A. and Roddick, J.C.
12687	91.7	1.1	Ar-Ar	51.6705	-127.423	British Columbia	Hunt, P.A. and Roddick, J.C.
12688	89.2	1	Ar-Ar	51.6815	-127.37	British Columbia	Hunt, P.A. and Roddick, J.C.
12689	91.2	1	Ar-Ar	51.6888	-127.309	British Columbia	Hunt, P.A. and Roddick, J.C.
12690	85.4	1.1	Ar-Ar	51.6905	-127.032	British Columbia	Hunt, P.A. and Roddick, J.C.
12691	73.9	0.7	Ar-Ar	51.6764	-126.801	British Columbia	Hunt, P.A. and Roddick, J.C.
12694	64.5	0.7	K-Ar	51.4782	-123.024	British Columbia	Hunt, P.A. and Roddick, J.C.
12695	90.7	1	Ar-Ar	51.4355	-122.89	British Columbia	Hunt, P.A. and Roddick, J.C.
12699	94.7	0.9	Ar-Ar	49.8981	-123.386	British Columbia	Hunt, P.A. and Roddick, J.C.
12700	99.1	1	Ar-Ar	49.8734	-123.672	British Columbia	Hunt, P.A. and Roddick, J.C.
12701	89.5	0.9	Ar-Ar	49.8338	-123.458	British Columbia	Hunt, P.A. and Roddick, J.C.
12702	94.8	1	Ar-Ar	49.5009	-123.124	British Columbia	Hunt, P.A. and Roddick, J.C.
12703	91.3	0.9	Ar-Ar	49.661	-122.342	British Columbia	Hunt, P.A. and Roddick, J.C.
12704	93.3	0.9	Ar-Ar	49.5975	-122.247	British Columbia	Hunt, P.A. and Roddick, J.C.
12705	97.1	1	Ar-Ar	49.4562	-122.964	British Columbia	Hunt, P.A. and Roddick, J.C.
12706	102.4	1.1	Ar-Ar	49.6794	-122.841	British Columbia	Hunt, P.A. and Roddick, J.C.
12707	109.9	1.5	Ar-Ar	49.6487	-122.546	British Columbia	Hunt, P.A. and Roddick, J.C.
12709	99.6	1.2	Ar-Ar	51.4597	-122.885	British Columbia	Hunt, P.A. and Roddick, J.C.
12721	110.5	1.1	Ar-Ar	51.6649	-128.142	British Columbia	Hunt, P.A. and Roddick, J.C.
12729	77	0.8	Ar-Ar	51.9458	-125.519	British Columbia	Hunt, P.A. and Roddick, J.C.
14281	95	5	Ar-Ar	49.581	-123.226	British Columbia	Irving, E., Baker, J., Wright, N., Yorath, C.J., Enkin, R.J. and York, D.
14490	162	12	K-Ar	48.7317	-125.106	British Columbia	Isachsen, C.E.
16VI10.4	72.91	0.17	Ar-Ar	48.5029	-120.71	British Columbia	Isava data
16VI11.11	84.56	0.17	Ar-Ar	47.748	-121.103	British Columbia	Isava data
16VI11.5	95.11	0.12	Ar-Ar	48.3709	-119.965	British Columbia	Isava data
16VI11.7	62.63	0.12	Ar-Ar	47.7153	-120.222	British Columbia	Isava data
16VI4.3	97.41	0.14	Ar-Ar	49.6803	-123.154	British Columbia	Isava data
16VI4.4	94.34	0.34	Ar-Ar	49.8457	-123.147	British Columbia	Isava data
16VI5.1A	95.1	0.15	Ar-Ar	50.2966	-122.821	British Columbia	Isava data
16VI5.1B	95.14	0.13	Ar-Ar	50.2966	-122.821	British Columbia	Isava data
16VI5.2	83.84	0.21	Ar-Ar	50.3031	-122.585	British Columbia	Isava data
16VI5.3	73.89	0.17	Ar-Ar	50.3714	-122.494	British Columbia	Isava data
16VI5.6	75.31	0.11	Ar-Ar	50.543	-122.109	British Columbia	Isava data
16VI7.3	75.07	0.13	Ar-Ar	50.0073	-121.721	British Columbia	Isava data
16VI7.6	86.58	0.51	Ar-Ar	49.3791	-121.487	British Columbia	Isava data
16VI8.2	84.2	0.11	Ar-Ar	49.6851	-121.864	British Columbia	Isava data
16VI8.3	78.18	0.17	Ar-Ar	49.7399	-121.857	British Columbia	Isava data
16VI8.4	78.81	0.1	Ar-Ar	49.7826	-121.855	British Columbia	Isava data
16VI8.7	76.82	0.19	Ar-Ar	49.7033	-121.855	British Columbia	Isava data
16VI9.1	140.75	2.18	Ar-Ar	49.2454	-121.979	British Columbia	Isava data
17VI01.01	55.6	0.39	Ar-Ar	47.9558	-118.972	Pacific Northwest	Isava data
17VI01.03	52.39	0.51	Ar-Ar	48.2598	-119.141	Pacific Northwest	Isava data
17VI01.04	85.46	0.46	Ar-Ar	48.3536	-119.701	Pacific Northwest	Isava data
17VI02.01	113.32	0.54	Ar-Ar	49.0208	-119.668	Pacific Northwest	Isava data
17VI02.07	111.8	0.58	Ar-Ar	49.1905	-119.552	Pacific Northwest	Isava data
17VI03.02	152.89	0.54	Ar-Ar	48.8529	-119.739	Pacific Northwest	Isava data
17VI03.03	146.62	0.58	Ar-Ar	48.8473	-119.78	Pacific Northwest	Isava data
17VI03.04	136.46	0.63	Ar-Ar	48.8549	-119.82	Pacific Northwest	Isava data
17VI03.05	102.14	0.54	Ar-Ar	48.869	-119.996	Pacific Northwest	Isava data
17VI03.06	102.4	0.49	Ar-Ar	48.515	-117.759	Pacific Northwest	Isava data
17VI03.07	73.35	0.39	Ar-Ar	48.6509	-117.504	Pacific Northwest	Isava data
17VI03.08	103.47	0.47	Ar-Ar	48.6173	-117.366	Pacific Northwest	Isava data
17VI04.06	79.92	0.32	Ar-Ar	48.3424	-116.362	Pacific Northwest	Isava data
17VI05.01	86.61	0.38	Ar-Ar	48.0178	-116.602	Pacific Northwest	Isava data
17VI05.02	62.4	0.29	Ar-Ar	47.9905	-116.69	Pacific Northwest	Isava data
17VI06.02	75.09	0.33	Ar-Ar	46.5768	-112.281	Pacific Northwest	Isava data
17VI06.03	74.52	0.45	Ar-Ar	46.5845	-112.262	Pacific Northwest	Isava data
17VI06.04	78.23	0.43	Ar-Ar	46.5455	-112.079	Pacific Northwest	Isava data
17VI06.05	75.74	0.34	Ar-Ar	46.2704	-112.222	Pacific Northwest	Isava data
17VI06.06	75.43	0.4	Ar-Ar	46.0992	-112.397	Pacific Northwest	Isava data
17VI06.07	74.48	0.98	Ar-Ar	45.9213	-112.411	Pacific Northwest	Isava data
17VI06.08	73.08	0.29	Ar-Ar	45.8594	-112.549	Pacific Northwest	Isava data
17VI07.04	50.79	0.25	Ar-Ar	46.2862	-115.384	Pacific Northwest	Isava data
17VI07.05	53.59	0.32	Ar-Ar	46.2194	-115.532	Pacific Northwest	Isava data
17VI07.06	79.58	0.34	Ar-Ar	45.8245	-115.914	Pacific Northwest	Isava data
17VI08.01	79.99	0.34	Ar-Ar	45.0202	-116.063	Pacific Northwest	Isava data
17VI08.02	75.44	0.32	Ar-Ar	44.6416	-115.628	Pacific Northwest	Isava data
17VI08.03	81.07	0.29	Ar-Ar	44.4049	-116.072	Pacific Northwest	Isava data
17VI08.04	73.92	0.34	Ar-Ar	44.2205	-115.927	Pacific Northwest	Isava data
17VI08.05	71.01	0.22	Ar-Ar	44.0457	-115.954	Pacific Northwest	Isava data
17VI08.06	67.77	0.25	Ar-Ar	44.0502	-115.891	Pacific Northwest	Isava data
17VI08.07	62.31	0.26	Ar-Ar	44.0716	-115.535	Pacific Northwest	Isava data
17VI09.01	83.14	0.31	Ar-Ar	44.2658	-114.759	Pacific Northwest	Isava data
17VI09.03	68.07	0.23	Ar-Ar	43.9325	-115.507	Pacific Northwest	Isava data
IM11-11	69.19	0.24	Ar-Ar	49.7516	-121.943	Pacific Northwest	Isava data
IM11-219	81.87	0.32	Ar-Ar	49.7731	-121.971	Pacific Northwest	Isava data
IM11-228	81.42	0.31	Ar-Ar	49.7767	-121.971	Pacific Northwest	Isava data
IM11-230	84.44	0.38	Ar-Ar	49.7796	-121.966	Pacific Northwest	Isava data
14141	194	8	K-Ar	50.4515	-121.045	British Columbia	Jones, M.B.
14142	208	8	K-Ar	50.4865	-121.056	British Columbia	Jones, M.B.
12889	104	6	K-Ar	51.4716	-119.838	British Columbia	Jung, A.
13815	138	10	K-Ar	51.7199	-120.023	British Columbia	Jung, A.
13816	174	16	K-Ar	51.8999	-121.03	British Columbia	Jung, A.
13817	186	12	K-Ar	51.4649	-120.511	British Columbia	Jung, A.
13206	106	10	K-Ar	51.4866	-119.826	British Columbia	Kirkland, K.J.
13207	101	10	K-Ar	51.4866	-119.826	British Columbia	Kirkland, K.J.
pyramid	81.5		K-Ar	36.8761	-118.624	Sierra Nevada	Kirkpatrick et al., 2012
Cl-1	113		K-Ar	36.9	-119.517	Sierra Nevada	Kistler and Dodge, 1966
FD-13	89		K-Ar	37.7167	-119.567	Sierra Nevada	Kistler and Dodge, 1966
6	67.1		K-Ar	35.5414	-118.248	Sierra Nevada	Kistler and Peterman 1978
7	78.7		K-Ar	35.4983	-118.208	Sierra Nevada	Kistler and Peterman 1978
8	74.8		K-Ar	35.3375	-118.176	Sierra Nevada	Kistler and Peterman 1978
10	71.1		K-Ar	35.029	-117.959	Sierra Nevada	Kistler and Peterman 1978
17	139.5		K-Ar	35.5321	-117.556	Sierra Nevada	Kistler and Peterman 1978
18	74.8		K-Ar	35.8606	-117.892	Sierra Nevada	Kistler and Peterman 1978
27	112.7		K-Ar	35.6701	-116.645	Sierra Nevada	Kistler and Peterman 1978
28	89		K-Ar	35.6634	-116.62	Sierra Nevada	Kistler and Peterman 1978
24-73	88		K-Ar	35.85	-118.85	Sierra Nevada	Kistler and Ross, 1990
25-73	81		K-Ar	35.6903	-118.22	Sierra Nevada	Kistler and Ross, 1990
DR-4763	88		K-Ar	35.85	-118.85	Sierra Nevada	Kistler and Ross, 1990
DR-4789A	89		K-Ar	35.7292	-118.549	Sierra Nevada	Kistler and Ross, 1990
DR-4796-1	89		K-Ar	35.7292	-118.549	Sierra Nevada	Kistler and Ross, 1990
DR-4819A	88		K-Ar	35.85	-118.85	Sierra Nevada	Kistler and Ross, 1990
DR-5006	88		K-Ar	35.85	-118.85	Sierra Nevada	Kistler and Ross, 1990
DR-5031	90		K-Ar	35.9658	-118.48	Sierra Nevada	Kistler and Ross, 1990
DR-5423	89		K-Ar	35.7292	-118.549	Sierra Nevada	Kistler and Ross, 1990
DR-5425	89		K-Ar	35.7292	-118.549	Sierra Nevada	Kistler and Ross, 1990
Bca-20	85		K-Ar	37.2406	-118.94	Sierra Nevada	Kistler et al., 1965
BCb-53	86		K-Ar	37.2144	-118.828	Sierra Nevada	Kistler et al., 1965
BCc-12	87		K-Ar	37.0911	-118.97	Sierra Nevada	Kistler et al., 1965
BCc-13	83		K-Ar	37	-118.972	Sierra Nevada	Kistler et al., 1965
BCc-14	85		K-Ar	37.0719	-118.97	Sierra Nevada	Kistler et al., 1965
BP-1	78		K-Ar	37.0931	-118.453	Sierra Nevada	Kistler et al., 1965
BP-2	104		K-Ar	37.0931	-118.374	Sierra Nevada	Kistler et al., 1965
BP-3	85		K-Ar	37.1128	-118.456	Sierra Nevada	Kistler et al., 1965
BP-4	87		K-Ar	37.2106	-118.48	Sierra Nevada	Kistler et al., 1965
BP-5	88		K-Ar	37.2125	-118.441	Sierra Nevada	Kistler et al., 1965
BP-6	91		K-Ar	37.1078	-118.326	Sierra Nevada	Kistler et al., 1965
BP-7	131		K-Ar	37.1272	-118.332	Sierra Nevada	Kistler et al., 1965
BP-8	83		K-Ar	37.0686	-118.285	Sierra Nevada	Kistler et al., 1965
BP-9	81		K-Ar	37.2353	-118.403	Sierra Nevada	Kistler et al., 1965
CL-1	113		K-Ar	36.8928	-119.519	Sierra Nevada	Kistler et al., 1965
HL-29	83		K-Ar	37.1514	-119.09	Sierra Nevada	Kistler et al., 1965
HL-4	82		K-Ar	37.2	-119.15	Sierra Nevada	Kistler et al., 1965
HL-9	83		K-Ar	37.2406	-119.157	Sierra Nevada	Kistler et al., 1965
KP-12	88		K-Ar	37.2731	-119.135	Sierra Nevada	Kistler et al., 1965
KP-5	82		K-Ar	37.325	-119.052	Sierra Nevada	Kistler et al., 1965
MG-1	77		K-Ar	37.2275	-118.612	Sierra Nevada	Kistler et al., 1965
MG-2	76		K-Ar	37.2406	-118.605	Sierra Nevada	Kistler et al., 1965
MG-3	87		K-Ar	37.1128	-118.514	Sierra Nevada	Kistler et al., 1965
MT-1	81		K-Ar	37.3972	-118.641	Sierra Nevada	Kistler et al., 1965
MT-2	87		K-Ar	37.4608	-118.227	Sierra Nevada	Kistler et al., 1965
MT-3	69		K-Ar	37.4217	-118.661	Sierra Nevada	Kistler et al., 1965
MT-4	79		K-Ar	37.4314	-118.656	Sierra Nevada	Kistler et al., 1965
MT-5	75		K-Ar	37.3639	-118.718	Sierra Nevada	Kistler et al., 1965
MT-6	74		K-Ar	37.3833	-118.691	Sierra Nevada	Kistler et al., 1965
SL-18	92		K-Ar	37.1494	-119.287	Sierra Nevada	Kistler et al., 1965
SL-25	90		K-Ar	37.0975	-119.347	Sierra Nevada	Kistler et al., 1965
SL-32	89		K-Ar	37.0389	-119.382	Sierra Nevada	Kistler et al., 1965
SL-36	89		K-Ar	37.0131	-119.403	Sierra Nevada	Kistler et al., 1965
WV-1	97		K-Ar	36.9611	-119.493	Sierra Nevada	Kistler et al., 1965
K10-87	88.16	Unknown	Ar-Ar	37.0768	-121.975	California	Kistler-R-W; Champion-D-E
MON12-88	89.5	Unknown	Ar-Ar	37.4629	-122.385	California	Kistler-R-W; Champion-D-E
25-73	81	Unknown	K-Ar	35.6903	-118.22	California	Kistler, Ronald W; Ross, D C
B1A-10	107.418	0.81842	Ar-Ar (recalculated from K-Ar)	32.1207	-116.513	California	Krummenacher et al 1975
B1A-14	107.213	0.71612	Ar-Ar (recalculated from K-Ar)	31.8679	-116.578	California	Krummenacher et al 1975
B1A-9	102.414	0.818493	Ar-Ar (recalculated from K-Ar)	32.1243	-116.624	California	Krummenacher et al 1975
B1B-18	91.0757	0.613994	Ar-Ar (recalculated from K-Ar)	31.9673	-116.001	California	Krummenacher et al 1975
B1B-20	100.065	0.613895	Ar-Ar (recalculated from K-Ar)	31.9143	-116.095	California	Krummenacher et al 1975
B1B-3	108.847	0.818399	Ar-Ar (recalculated from K-Ar)	31.8759	-116.553	California	Krummenacher et al 1975
B1B-4	105.784	0.716138	Ar-Ar (recalculated from K-Ar)	31.8679	-116.578	California	Krummenacher et al 1975
B1B-6	93.9362	0.613962	Ar-Ar (recalculated from K-Ar)	32.0468	-116.141	California	Krummenacher et al 1975
B1B-7	89.2367	0.614014	Ar-Ar (recalculated from K-Ar)	32.0465	-116.131	California	Krummenacher et al 1975
B1C-12	91.0757	0.613994	Ar-Ar (recalculated from K-Ar)	31.9323	-115.908	California	Krummenacher et al 1975
B1C-13	94.9578	0.613951	Ar-Ar (recalculated from K-Ar)	32.1318	-115.95	California	Krummenacher et al 1975
B1D-5	106.499	0.716129	Ar-Ar (recalculated from K-Ar)	32.995	-116.981	California	Krummenacher et al 1975
B1D-6	90.9736	0.613995	Ar-Ar (recalculated from K-Ar)	32.9658	-116.51	California	Krummenacher et al 1975
B1D-7	102.005	0.613874	Ar-Ar (recalculated from K-Ar)	32.8418	-116.611	California	Krummenacher et al 1975
B1D-8	103.129	0.613862	Ar-Ar (recalculated from K-Ar)	32.8173	-116.861	California	Krummenacher et al 1975
B1F-1	116.81	0.715998	Ar-Ar (recalculated from K-Ar)	32.4045	-116.917	California	Krummenacher et al 1975
B1F-10	92.3017	0.61398	Ar-Ar (recalculated from K-Ar)	32.3076	-116.291	California	Krummenacher et al 1975
B1F-13	96.2857	0.613937	Ar-Ar (recalculated from K-Ar)	32.2595	-116.326	California	Krummenacher et al 1975
B1F-15	97.3072	0.716246	Ar-Ar (recalculated from K-Ar)	32.237	-116.249	California	Krummenacher et al 1975
B1F-16	98.1243	0.818555	Ar-Ar (recalculated from K-Ar)	32.1907	-116.22	California	Krummenacher et al 1975
B1F-9	95.3664	0.613947	Ar-Ar (recalculated from K-Ar)	32.3168	-116.291	California	Krummenacher et al 1975
B1J-2	74.52	0.614176	Ar-Ar (recalculated from K-Ar)	32.6582	-116.098	California	Krummenacher et al 1975
B1J-3	87.6019	0.614032	Ar-Ar (recalculated from K-Ar)	32.5729	-116.449	California	Krummenacher et al 1975
B1J-4	74.2133	0.511816	Ar-Ar (recalculated from K-Ar)	32.5593	-115.895	California	Krummenacher et al 1975
B1J-5	92.1995	0.920972	Ar-Ar (recalculated from K-Ar)	32.3465	-116.294	California	Krummenacher et al 1975
B1K-3	100.269	0.613893	Ar-Ar (recalculated from K-Ar)	32.2973	-116.533	California	Krummenacher et al 1975
B1R-14	94.447	0.716283	Ar-Ar (recalculated from K-Ar)	32.9058	-116.457	California	Krummenacher et al 1975
B1S-10	79.5286	0.511767	Ar-Ar (recalculated from K-Ar)	32.3695	-115.981	California	Krummenacher et al 1975
B1S-103	76.9733	0.614149	Ar-Ar (recalculated from K-Ar)	33.4228	-115.873	California	Krummenacher et al 1975
B1S-105	76.5644	0.614153	Ar-Ar (recalculated from K-Ar)	32.539	-115.886	California	Krummenacher et al 1975
B1S-106B	80.1419	2.3541	Ar-Ar (recalculated from K-Ar)	32.5884	-115.734	California	Krummenacher et al 1975
B1S-106C	70.0217	0.409484	Ar-Ar (recalculated from K-Ar)	32.5884	-115.734	California	Krummenacher et al 1975
B1S-12	69.306	0.511861	Ar-Ar (recalculated from K-Ar)	32.2937	-116.042	California	Krummenacher et al 1975
B1S-13	85.7626	0.614052	Ar-Ar (recalculated from K-Ar)	32.3368	-116.04	California	Krummenacher et al 1975
B1S-4	90.9736	0.613995	Ar-Ar (recalculated from K-Ar)	32.2118	-115.983	California	Krummenacher et al 1975
B1S-5	93.3233	1.12561	Ar-Ar (recalculated from K-Ar)	32.2195	-115.986	California	Krummenacher et al 1975
B1S-6	78.9154	0.614127	Ar-Ar (recalculated from K-Ar)	32.2615	-115.969	California	Krummenacher et al 1975
B1S-8	73.3955	0.511824	Ar-Ar (recalculated from K-Ar)	32.2723	-115.953	California	Krummenacher et al 1975
B1X-11	110.277	0.716081	Ar-Ar (recalculated from K-Ar)	31.9759	-116.381	California	Krummenacher et al 1975
B2G-109	86.9888	0.614039	Ar-Ar (recalculated from K-Ar)	31.0601	-114.821	California	Krummenacher et al 1975
B2G-121	78.711	1.53532	Ar-Ar (recalculated from K-Ar)	32.0184	-115.242	California	Krummenacher et al 1975
B2G-222	79.733	0.511765	Ar-Ar (recalculated from K-Ar)	32.1193	-115.765	California	Krummenacher et al 1975
B2G-225	94.6513	1.12558	Ar-Ar (recalculated from K-Ar)	32.4843	-116.216	California	Krummenacher et al 1975
B2G-304	115.891	0.818297	Ar-Ar (recalculated from K-Ar)	32.5004	-116.718	California	Krummenacher et al 1975
B2G-307	102.925	0.613864	Ar-Ar (recalculated from K-Ar)	32.5093	-116.603	California	Krummenacher et al 1975
B2G-308	109.766	0.818386	Ar-Ar (recalculated from K-Ar)	32.6415	-116.778	California	Krummenacher et al 1975
B2G-310	114.564	0.818316	Ar-Ar (recalculated from K-Ar)	32.7251	-116.985	California	Krummenacher et al 1975
B4G-806	91.7909	0.613986	Ar-Ar (recalculated from K-Ar)	31.789	-115.829	California	Krummenacher et al 1975
B6B-13	66.034	0.409513	Ar-Ar (recalculated from K-Ar)	31.5084	-115.194	California	Krummenacher et al 1975
B6B-160	82.7991	0.614085	Ar-Ar (recalculated from K-Ar)	31.0118	-115.125	California	Krummenacher et al 1975
B6G-54	105.886	0.716137	Ar-Ar (recalculated from K-Ar)	31.634	-116.474	California	Krummenacher et al 1975
B8B-21	80.5507	0.511758	Ar-Ar (recalculated from K-Ar)	31.3709	-115.251	California	Krummenacher et al 1975
B9E-1	79.1198	0.409417	Ar-Ar (recalculated from K-Ar)	31.3076	-115.458	California	Krummenacher et al 1975
B9E-2	81.0617	1.02351	Ar-Ar (recalculated from K-Ar)	31.3109	-115.442	California	Krummenacher et al 1975
B9E-3	82.6969	0.409391	Ar-Ar (recalculated from K-Ar)	31.3109	-115.442	California	Krummenacher et al 1975
B9E-5	83.3101	0.409386	Ar-Ar (recalculated from K-Ar)	31.3204	-115.465	California	Krummenacher et al 1975
B9E-7	84.8429	0.409375	Ar-Ar (recalculated from K-Ar)	31.3076	-115.458	California	Krummenacher et al 1975
B9E-8	81.8793	0.409397	Ar-Ar (recalculated from K-Ar)	31.3109	-115.442	California	Krummenacher et al 1975
B9H-1	100.984	1.84166	Ar-Ar (recalculated from K-Ar)	32.2832	-116.527	California	Krummenacher et al 1975
B9S-1	94.2427	0.409306	Ar-Ar (recalculated from K-Ar)	31.6857	-116.133	California	Krummenacher et al 1975
BCI-911	100.167	1.02316	Ar-Ar (recalculated from K-Ar)	32.2501	-116.598	California	Krummenacher et al 1975
FB-1	64.091	0.409527	Ar-Ar (recalculated from K-Ar)	32.2979	-115.334	California	Krummenacher et al 1975
G-1	76.8711	0.409433	Ar-Ar (recalculated from K-Ar)	32.6926	-116.054	California	Krummenacher et al 1975
JKT	68.6925	1.43323	Ar-Ar (recalculated from K-Ar)	32.284	-115.352	California	Krummenacher et al 1975
JSR-1	92.9147	0.613974	Ar-Ar (recalculated from K-Ar)	32.6309	-116.438	California	Krummenacher et al 1975
JSR-3	89.3389	0.614013	Ar-Ar (recalculated from K-Ar)	32.6134	-116.21	California	Krummenacher et al 1975
JSR-6	79.0687	0.716487	Ar-Ar (recalculated from K-Ar)	32.7073	-116.032	California	Krummenacher et al 1975
JSR-7	90.5649	0.613999	Ar-Ar (recalculated from K-Ar)	32.6793	-116.293	California	Krummenacher et al 1975
MS	66.2385	1.8428	Ar-Ar (recalculated from K-Ar)	32.2784	-115.357	California	Krummenacher et al 1975
44	169		K-Ar	41.0791	-123.567	California and Oregon	Lanphere et al, 1968
46	171		K-Ar	40.7811	-123.397	California and Oregon	Lanphere et al, 1968
58	135		K-Ar	40.6465	-122.766	California and Oregon	Lanphere et al, 1968
59	134		K-Ar	40.6684	-122.736	California and Oregon	Lanphere et al, 1968
b5	171	5	K-Ar	40.8322	-123.451	California	Lanphere et al., 1968
b5-2	169	5	K-Ar	40.8322	-123.451	California	Lanphere et al., 1968
c3	161	4	K-Ar	41.8173	-123.149	California	Lanphere et al., 1968
c6	158	5	K-Ar	41.4514	-123.282	California	Lanphere et al., 1968
c6-2	158	5	K-Ar	41.4514	-123.282	California	Lanphere et al., 1968
c7	159	5	K-Ar	41.4021	-123.215	California	Lanphere et al., 1968
c9	150	5	K-Ar	41.8179	-122.754	California	Lanphere et al., 1968
d1	151	5	K-Ar	41.1928	-122.73	California	Lanphere et al., 1968
d1-2	136	4	K-Ar	41.1928	-122.73	California	Lanphere et al., 1968
f12	139	4	K-Ar	40.7093	-121.824	California	Lanphere et al., 1968
f15	164	5	K-Ar	40.9318	-122.048	California	Lanphere et al., 1968
f16	130	4	K-Ar	40.6008	-122.655	California	Lanphere et al., 1968
f16-2	134	4	K-Ar	40.6008	-122.655	California	Lanphere et al., 1968
f16-3	135	4	K-Ar	40.6008	-122.655	California	Lanphere et al., 1968
f9	136	4	K-Ar	41.2589	-122.781	California	Lanphere et al., 1968
52	164		K-Ar	40.8292	-123.12	California and Oregon	Lanphere, 1983, personal communication
A-5	135.3	Unknown	K-Ar	40.6667	-122.783	California	Lanphere, Marvin A; Irwin, William P; Hotz, Preston E
10169	197.6	16	K-Ar	58.1415	-129.869	British Columbia	Leech, G.B., Lowdon, J.A., Stockwell, C.H. and Wanless, R.K.
10226	125.6	10	K-Ar	58.4498	-127.702	British Columbia	Leech, G.B., Lowdon, J.A., Stockwell, C.H. and Wanless, R.K.
10398	211.7	16	K-Ar	58.5775	-133.043	British Columbia	Leech, G.B., Lowdon, J.A., Stockwell, C.H. and Wanless, R.K.
10399	70.9	8	K-Ar	58.573	-133.135	British Columbia	Leech, G.B., Lowdon, J.A., Stockwell, C.H. and Wanless, R.K.
10944	191	15	K-Ar	52.0999	-120.919	British Columbia	Leech, G.B., Lowdon, J.A., Stockwell, C.H. and Wanless, R.K.
11007	79.7	8	K-Ar	55.0888	-123.315	British Columbia	Leech, G.B., Lowdon, J.A., Stockwell, C.H. and Wanless, R.K.
12244	134.9	10	K-Ar	50.76	-116.831	British Columbia	Leech, G.B., Lowdon, J.A., Stockwell, C.H. and Wanless, R.K.
12247	77.6	8	K-Ar	50.7899	-118.256	British Columbia	Leech, G.B., Lowdon, J.A., Stockwell, C.H. and Wanless, R.K.
12260	88	8	K-Ar	50.0899	-116.558	British Columbia	Leech, G.B., Lowdon, J.A., Stockwell, C.H. and Wanless, R.K.
12261	77.6	8	K-Ar	49.8666	-116.568	British Columbia	Leech, G.B., Lowdon, J.A., Stockwell, C.H. and Wanless, R.K.
12273	148.2	11	K-Ar	50.3699	-116.779	British Columbia	Leech, G.B., Lowdon, J.A., Stockwell, C.H. and Wanless, R.K.
12278	110.3	8	K-Ar	50.6033	-116.513	British Columbia	Leech, G.B., Lowdon, J.A., Stockwell, C.H. and Wanless, R.K.
12280	71.1	8	K-Ar	49.9873	-117.834	British Columbia	Leech, G.B., Lowdon, J.A., Stockwell, C.H. and Wanless, R.K.
12288	67.9	8	K-Ar	50.6466	-117.839	British Columbia	Leech, G.B., Lowdon, J.A., Stockwell, C.H. and Wanless, R.K.
12290	121.8	9	K-Ar	49.0933	-117.171	British Columbia	Leech, G.B., Lowdon, J.A., Stockwell, C.H. and Wanless, R.K.
12301	120.8	10	K-Ar	49.55	-116.144	British Columbia	Leech, G.B., Lowdon, J.A., Stockwell, C.H. and Wanless, R.K.
12307	66.2	8	K-Ar	50.5524	-118.076	British Columbia	Leech, G.B., Lowdon, J.A., Stockwell, C.H. and Wanless, R.K.
12310	129.8	10	K-Ar	50.7665	-119.338	British Columbia	Leech, G.B., Lowdon, J.A., Stockwell, C.H. and Wanless, R.K.
12329	102	8	K-Ar	49.4083	-116.739	British Columbia	Leech, G.B., Lowdon, J.A., Stockwell, C.H. and Wanless, R.K.
12330	64.6	8	K-Ar	49.4883	-117.343	British Columbia	Leech, G.B., Lowdon, J.A., Stockwell, C.H. and Wanless, R.K.
12331	107.3	8	K-Ar	49.6099	-117.133	British Columbia	Leech, G.B., Lowdon, J.A., Stockwell, C.H. and Wanless, R.K.
12332	167.2	13	K-Ar	49.7816	-117.339	British Columbia	Leech, G.B., Lowdon, J.A., Stockwell, C.H. and Wanless, R.K.
12334	175.5	14	K-Ar	49.9333	-117.134	British Columbia	Leech, G.B., Lowdon, J.A., Stockwell, C.H. and Wanless, R.K.
12336	163.2	13	K-Ar	49.7733	-117.076	British Columbia	Leech, G.B., Lowdon, J.A., Stockwell, C.H. and Wanless, R.K.
12339	175.5	14	K-Ar	49.7833	-117.374	British Columbia	Leech, G.B., Lowdon, J.A., Stockwell, C.H. and Wanless, R.K.
12340	169.1	13	K-Ar	49.7633	-117.226	British Columbia	Leech, G.B., Lowdon, J.A., Stockwell, C.H. and Wanless, R.K.
12343	131.6	10	K-Ar	49.2583	-117.084	British Columbia	Leech, G.B., Lowdon, J.A., Stockwell, C.H. and Wanless, R.K.
12360	183.4	14	K-Ar	50.1815	-116.576	British Columbia	Leech, G.B., Lowdon, J.A., Stockwell, C.H. and Wanless, R.K.
12361	236.5	18	K-Ar	50.21	-116.562	British Columbia	Leech, G.B., Lowdon, J.A., Stockwell, C.H. and Wanless, R.K.
12366	129.5	10	K-Ar	49.7883	-116.316	British Columbia	Leech, G.B., Lowdon, J.A., Stockwell, C.H. and Wanless, R.K.
12367	141.2	11	K-Ar	49.7616	-116.331	British Columbia	Leech, G.B., Lowdon, J.A., Stockwell, C.H. and Wanless, R.K.
12379	172.3	13	K-Ar	51.3333	-117.834	British Columbia	Leech, G.B., Lowdon, J.A., Stockwell, C.H. and Wanless, R.K.
12380	94.2	8	K-Ar	51.0499	-117.501	British Columbia	Leech, G.B., Lowdon, J.A., Stockwell, C.H. and Wanless, R.K.
12382	96.5	8	K-Ar	51.0499	-117.501	British Columbia	Leech, G.B., Lowdon, J.A., Stockwell, C.H. and Wanless, R.K.
12408	242.7	19	K-Ar	50.4832	-120.918	British Columbia	Leech, G.B., Lowdon, J.A., Stockwell, C.H. and Wanless, R.K.
12409	231.9	18	K-Ar	50.4902	-120.919	British Columbia	Leech, G.B., Lowdon, J.A., Stockwell, C.H. and Wanless, R.K.
12410	250.3	20	K-Ar	50.5007	-120.942	British Columbia	Leech, G.B., Lowdon, J.A., Stockwell, C.H. and Wanless, R.K.
12411	238.8	18	K-Ar	50.4819	-120.929	British Columbia	Leech, G.B., Lowdon, J.A., Stockwell, C.H. and Wanless, R.K.
12412	247.3	19	K-Ar	50.486	-121.06	British Columbia	Leech, G.B., Lowdon, J.A., Stockwell, C.H. and Wanless, R.K.
12413	228.8	18	K-Ar	50.486	-121.06	British Columbia	Leech, G.B., Lowdon, J.A., Stockwell, C.H. and Wanless, R.K.
12415	146.3	12	K-Ar	49.5165	-120.918	British Columbia	Leech, G.B., Lowdon, J.A., Stockwell, C.H. and Wanless, R.K.
12416	190.8	15	K-Ar	49.5748	-120.901	British Columbia	Leech, G.B., Lowdon, J.A., Stockwell, C.H. and Wanless, R.K.
14376	63.7	4.4	K-Ar	51.0163	-122.854	British Columbia	Leitch, C.H.B., van der Heyden, P., Godwin, C.I., Armstrong, R.L. and Harakal, J.E.
14702	100.84	0.98	Ar-Ar	51.5888	-118.585	British Columbia	Logan, J.M. and Colpron, M.
14704	60.54	0.64	Ar-Ar	51.4787	-118.433	British Columbia	Logan, J.M. and Colpron, M.
14705	99.69	0.96	Ar-Ar	51.5287	-118.279	British Columbia	Logan, J.M. and Colpron, M.
10751	343	24	K-Ar	56.8396	-130.785	British Columbia	Logan, J.M., Drobe, J.R. and McClelland, W.C.
10751	346	20	K-Ar	56.8396	-130.785	British Columbia	Logan, J.M., Drobe, J.R. and McClelland, W.C.
10146	62.1	8	K-Ar	59.6238	-135.133	British Columbia	Lowdon, J.A.
10149	70.1	8	K-Ar	59.8413	-135.019	British Columbia	Lowdon, J.A.
10213	73.1	8	K-Ar	58.8873	-130.024	British Columbia	Lowdon, J.A.
12203	50.5	8	K-Ar	49.6903	-117.318	British Columbia	Lowdon, J.A.
12204	56.2	8	K-Ar	49.5999	-117.251	British Columbia	Lowdon, J.A.
12214	61.6	8	K-Ar	49.8963	-117.623	British Columbia	Lowdon, J.A.
12220	59.7	8	K-Ar	49.8869	-117.701	British Columbia	Lowdon, J.A.
12276	87.7	8	K-Ar	49.4833	-117.301	British Columbia	Lowdon, J.A.
12284	333.9	26	K-Ar	51.2	-116.484	British Columbia	Lowdon, J.A.
12285	348.4	27	K-Ar	51.2	-116.484	British Columbia	Lowdon, J.A.
12368	80.5	8	K-Ar	49.7999	-116.218	British Columbia	Lowdon, J.A.
12373	57.7	8	K-Ar	49.7999	-116.268	British Columbia	Lowdon, J.A.
12374	61.6	8	K-Ar	49.8499	-116.234	British Columbia	Lowdon, J.A.
10145	55.6	8	K-Ar	59.733	-134.985	British Columbia	Lowdon, J.A., Stockwell, C.H., Tipper, H.W. and Wanless, R.K.
10147	66.3	8	K-Ar	59.5663	-135.185	British Columbia	Lowdon, J.A., Stockwell, C.H., Tipper, H.W. and Wanless, R.K.
10148	71.6	8	K-Ar	59.508	-135.227	British Columbia	Lowdon, J.A., Stockwell, C.H., Tipper, H.W. and Wanless, R.K.
10151	66.5	8	K-Ar	59.7914	-135.01	British Columbia	Lowdon, J.A., Stockwell, C.H., Tipper, H.W. and Wanless, R.K.
11068	157.9	12	K-Ar	54.0166	-125.002	British Columbia	Lowdon, J.A., Stockwell, C.H., Tipper, H.W. and Wanless, R.K.
11069	140.9	11	K-Ar	54.0986	-125.035	British Columbia	Lowdon, J.A., Stockwell, C.H., Tipper, H.W. and Wanless, R.K.
11070	182.5	14	K-Ar	54.5133	-124.877	British Columbia	Lowdon, J.A., Stockwell, C.H., Tipper, H.W. and Wanless, R.K.
11071	64.6	8	K-Ar	53.6999	-124.035	British Columbia	Lowdon, J.A., Stockwell, C.H., Tipper, H.W. and Wanless, R.K.
12221	58	8	K-Ar	50.5785	-118.71	British Columbia	Lowdon, J.A., Stockwell, C.H., Tipper, H.W. and Wanless, R.K.
12225	72.8	8	K-Ar	50.9314	-118.451	British Columbia	Lowdon, J.A., Stockwell, C.H., Tipper, H.W. and Wanless, R.K.
12243	102.5	8	K-Ar	50.7349	-116.926	British Columbia	Lowdon, J.A., Stockwell, C.H., Tipper, H.W. and Wanless, R.K.
12251	67.9	8	K-Ar	49.7333	-117.968	British Columbia	Lowdon, J.A., Stockwell, C.H., Tipper, H.W. and Wanless, R.K.
12252	59.2	8	K-Ar	49.7999	-117.901	British Columbia	Lowdon, J.A., Stockwell, C.H., Tipper, H.W. and Wanless, R.K.
12253	54.1	8	K-Ar	49.8208	-117.94	British Columbia	Lowdon, J.A., Stockwell, C.H., Tipper, H.W. and Wanless, R.K.
12255	60.4	8	K-Ar	49.7069	-117.901	British Columbia	Lowdon, J.A., Stockwell, C.H., Tipper, H.W. and Wanless, R.K.
12263	286.6	22	K-Ar	51.7111	-117.843	British Columbia	Lowdon, J.A., Stockwell, C.H., Tipper, H.W. and Wanless, R.K.
12264	133.9	10	K-Ar	51.7111	-117.843	British Columbia	Lowdon, J.A., Stockwell, C.H., Tipper, H.W. and Wanless, R.K.
12265	203.9	16	K-Ar	51.7688	-117.859	British Columbia	Lowdon, J.A., Stockwell, C.H., Tipper, H.W. and Wanless, R.K.
12270	130.3	9	K-Ar	50.37	-116.781	British Columbia	Lowdon, J.A., Stockwell, C.H., Tipper, H.W. and Wanless, R.K.
12277	210.2	16	K-Ar	50.635	-116.596	British Columbia	Lowdon, J.A., Stockwell, C.H., Tipper, H.W. and Wanless, R.K.
12337	133.7	10	K-Ar	49.8583	-117.048	British Columbia	Lowdon, J.A., Stockwell, C.H., Tipper, H.W. and Wanless, R.K.
12370	83.8	8	K-Ar	49.8528	-116.279	British Columbia	Lowdon, J.A., Stockwell, C.H., Tipper, H.W. and Wanless, R.K.
12372	74.9	8	K-Ar	49.8091	-116.271	British Columbia	Lowdon, J.A., Stockwell, C.H., Tipper, H.W. and Wanless, R.K.
98BLO014	63.585	0.175	Ar-Ar	46.027	-112.476	Montana	Lund et al 2002
12915	51.5	3	K-Ar	49.1016	-117.248	British Columbia	MacDonald, A.S.
12916	101	6	K-Ar	49.1083	-117.216	British Columbia	MacDonald, A.S.
11214	81.3	5.4	K-Ar	53.7449	-127.189	British Columbia	MacIntyre, D.G.
11215	78	5	K-Ar	53.7999	-127.268	British Columbia	MacIntyre, D.G.
11219	76	4.4	K-Ar	53.7332	-127.135	British Columbia	MacIntyre, D.G.
11220	77	4.6	K-Ar	53.5332	-127.335	British Columbia	MacIntyre, D.G.
11222	84.1	5.8	K-Ar	53.7599	-127.202	British Columbia	MacIntyre, D.G.
11829	78.3	0.8	Ar-Ar	54.7503	-126.335	British Columbia	MacIntyre, D.G. and Villeneuve, M.E.
11831	53.5	0.6	Ar-Ar	55.1842	-126.285	British Columbia	MacIntyre, D.G. and Villeneuve, M.E.
11832	53.2	0.5	Ar-Ar	55.1911	-126.321	British Columbia	MacIntyre, D.G. and Villeneuve, M.E.
11833	52.4	0.5	Ar-Ar	55.2152	-126.386	British Columbia	MacIntyre, D.G. and Villeneuve, M.E.
11835	52.1	0.6	Ar-Ar	55.4068	-126.334	British Columbia	MacIntyre, D.G. and Villeneuve, M.E.
11836	51.9	0.5	Ar-Ar	55.2416	-126.167	British Columbia	MacIntyre, D.G. and Villeneuve, M.E.
11837	51.7	0.5	Ar-Ar	55.2857	-126.243	British Columbia	MacIntyre, D.G. and Villeneuve, M.E.
11838	52	0.5	Ar-Ar	54.7324	-126.242	British Columbia	MacIntyre, D.G. and Villeneuve, M.E.
11857	193	2	Ar-Ar	54.9019	-126.072	British Columbia	MacIntyre, D.G., Villeneuve, M.E. and Schiarizza, P.
USGSDH80GM-227	71.2		K-Ar	34.7769	-115.744		Marvin-Richard-F; Mehnert-Harald-H; Naeser-Charles-W 1989
13778	91	4	K-Ar	49.7102	-123.133	British Columbia	Mathews, W.H.
13779	95	6	K-Ar	49.711	-123.13	British Columbia	Mathews, W.H.
13780	97	8	K-Ar	49.8498	-123.135	British Columbia	Mathews, W.H.
13782	95	8	K-Ar	49.6707	-123.166	British Columbia	Mathews, W.H.
13200	87	6	K-Ar	49.1762	-119.493	British Columbia	Mathews, W.H. and Armstrong, R.L.
13792	160	10	K-Ar	49.4643	-123.455	British Columbia	McKillop, G.R.
14001	80.7	5	K-Ar	49.4707	-121.494	British Columbia	McLeod, J.A., Vining, M. and McTaggart, K.C.
10917	88.9	5.2	K-Ar	51.0946	-123.388	British Columbia	McMillan, W.J.
10921	86.9	5	K-Ar	51.0946	-123.388	British Columbia	McMillan, W.J.
14160	56.1	4	K-Ar	49.6777	-121.001	British Columbia	McMillan, W.J.
14161	53.5	3.8	K-Ar	49.6915	-121.018	British Columbia	McMillan, W.J.
14162	57.3	4	K-Ar	51.1349	-122.623	British Columbia	McMillan, W.J.
14164	209	14	K-Ar	50.2095	-120.94	British Columbia	McMillan, W.J.
BC-1	86.6		Ar-Ar (ign)	37.7208	-119.271	Sierra Nevada	McNulty, 1995
BC-2	84.9		Ar-Ar (met)	37.7222	-119.276	Sierra Nevada	McNulty, 1995
BC-3	78.4		Ar-Ar (met)	37.6444	-119.225	Sierra Nevada	McNulty, 1995
14140	77	6	K-Ar	49.5982	-121.458	British Columbia	McTaggart, K.C. and Thompson, R.M.
12759	168	19.4	K-Ar	49.6099	-119.798	British Columbia	Medford, G.A.
12760	135	8.2	K-Ar	49.7082	-119.815	British Columbia	Medford, G.A.
12761	52.7	3.2	K-Ar	49.7132	-119.276	British Columbia	Medford, G.A.
12762	52.7	3.2	K-Ar	49.2499	-119.176	British Columbia	Medford, G.A.
12763	188	13.2	K-Ar	49.4199	-119.788	British Columbia	Medford, G.A.
CP	81		Ar-Ar	38.0486	-119.343	Sierra Nevada	Memeti et al., 2010
GLP	84		Ar-Ar	38.0717	-119.293	Sierra Nevada	Memeti et al., 2010
KCL428	87.7		Ar-Ar	37.7649	-119.278	Sierra Nevada	Memeti et al., 2010
RE007	87.9		Ar-Ar	37.6713	-119.329	Sierra Nevada	Memeti et al., 2010
SLP	82.1		Ar-Ar	38.0575	-119.342	Sierra Nevada	Memeti et al., 2010
11305	73.7	2.5	K-Ar	54.0165	-126.968	British Columbia	Mesard, P.M., Godwin, C.I. and Carter, N.C.
11306	76.9	4.6	K-Ar	54.0165	-126.968	British Columbia	Mesard, P.M., Godwin, C.I. and Carter, N.C.
00SZ74-1	76.01	0.29	Ar-Ar	33.5701	-116.525	Peninsular Range	Miggins et al 2014
00SZ74-2	74.43	0.26	Ar-Ar	33.5693	-116.502	Peninsular Range	Miggins et al 2014
00SZ74-6	68.22	0.23	Ar-Ar	33.5834	-116.438	Peninsular Range	Miggins et al 2014
ADTZ	103.03	0.34	Ar-Ar	33.7367	-117.322	Peninsular Range	Miggins et al 2014
DVZ	102.54	0.16	Ar-Ar	33.6712	-117.206	Peninsular Range	Miggins et al 2014
DVZ-2	93.14	0.17	Ar-Ar	33.7355	-117.117	Peninsular Range	Miggins et al 2014
EPZ	112.23	0.24	Ar-Ar	33.596	-117.341	Peninsular Range	Miggins et al 2014
GZ	102.8	0.16	Ar-Ar	33.7908	-117.344	Peninsular Range	Miggins et al 2014
GZ-1	104.33	0.44	Ar-Ar	33.7765	-117.318	Peninsular Range	Miggins et al 2014
GZ-2	105.02	0.37	Ar-Ar	33.7143	-117.3	Peninsular Range	Miggins et al 2014
HSCZ	117.05	0.21	Ar-Ar	33.6038	-117.51	Peninsular Range	Miggins et al 2014
JMZ	97.46	0.38	Ar-Ar	34.0365	-117.433	Peninsular Range	Miggins et al 2014
JMZ-2	96.66	0.19	Ar-Ar	34.0203	-117.475	Peninsular Range	Miggins et al 2014
Lakeview	92.76	0.16	Ar-Ar	33.757	-117.116	Peninsular Range	Miggins et al 2014
Leadwell No.1	103.2	1	Ar-Ar	34.1982	-118.406	Peninsular Range	Miggins et al 2014
McCarty No. 1	108.15	0.21	Ar-Ar	33.9295	-117.612	Peninsular Range	Miggins et al 2014
MRZ	98	0.26	Ar-Ar	33.9848	-117.391	Peninsular Range	Miggins et al 2014
NR 99-1	88.175	0.23	Ar-Ar	33.6831	-117.064	Peninsular Range	Miggins et al 2014
NR 99-10	86.29	0.14	Ar-Ar	33.6867	-117.035	Peninsular Range	Miggins et al 2014
NR 99-11a	64.97	0.12	Ar-Ar	33.6875	-117.034	Peninsular Range	Miggins et al 2014
NR 99-11b	80.715	0.175	Ar-Ar	33.6875	-117.034	Peninsular Range	Miggins et al 2014
NR 99-14	92.52	0.21	Ar-Ar	33.6915	-117.032	Peninsular Range	Miggins et al 2014
NR 99-15	87.565	0.29	Ar-Ar	33.6939	-117.029	Peninsular Range	Miggins et al 2014
NR 99-18	84.61	0.15	Ar-Ar	33.6957	-117.023	Peninsular Range	Miggins et al 2014
NR 99-2	71.36	0.29	Ar-Ar	33.6822	-117.065	Peninsular Range	Miggins et al 2014
NR 99-20	86.72	0.22	Ar-Ar	33.7035	-117.014	Peninsular Range	Miggins et al 2014
NR 99-21	57.56	0.15	Ar-Ar	33.7011	-117.01	Peninsular Range	Miggins et al 2014
NR 99-3	89.12	0.27	Ar-Ar	33.6833	-117.064	Peninsular Range	Miggins et al 2014
NR 99-4	90.81	0.22	Ar-Ar	33.6919	-117.051	Peninsular Range	Miggins et al 2014
NR 99-6	77.23	0.15	Ar-Ar	33.6872	-117.043	Peninsular Range	Miggins et al 2014
NR 99-7	78.54	0.29	Ar-Ar	33.6868	-117.04	Peninsular Range	Miggins et al 2014
NR 99-9	92.34	0.23	Ar-Ar	33.6863	-117.036	Peninsular Range	Miggins et al 2014
OHZ	118.07	0.25	Ar-Ar	33.5923	-117.505	Peninsular Range	Miggins et al 2014
PFZ-1	68.46	0.34	Ar-Ar	33.5845	-116.427	Peninsular Range	Miggins et al 2014
PH-1	73.16	0.17	Ar-Ar	34.2617	-118.407	Peninsular Range	Miggins et al 2014
PHZ	62.67	0.1	Ar-Ar	33.7128	-116.296	Peninsular Range	Miggins et al 2014
PVZ	116.7	0.52	Ar-Ar	33.6592	-117.287	Peninsular Range	Miggins et al 2014
PVZ-2	115.05	0.22	Ar-Ar	33.5972	-117.208	Peninsular Range	Miggins et al 2014
RBZ	88.98	0.31	Ar-Ar	33.718	-116.939	Peninsular Range	Miggins et al 2014
SFQZ	95.02	0.19	Ar-Ar	34.0242	-117.46	Peninsular Range	Miggins et al 2014
SJZ	91.58	0.45	Ar-Ar	33.723	-116.722	Peninsular Range	Miggins et al 2014
SMZ	110.16	0.21	Ar-Ar	33.5122	-117.339	Peninsular Range	Miggins et al 2014
SREZ	91.2	0.25	Ar-Ar	33.7127	-116.988	Peninsular Range	Miggins et al 2014
SRPZ	109.67	0.17	Ar-Ar	33.5348	-117.264	Peninsular Range	Miggins et al 2014
VVZ	94.26	0.16	Ar-Ar	33.886	-117.29	Peninsular Range	Miggins et al 2014
WVRZ	90.69	0.16	Ar-Ar	33.5265	-116.885	Peninsular Range	Miggins et al 2014
10457	55.3	1.8	K-Ar	59.2776	-134.482	British Columbia	Mihalynuk, M.G.
12357	55.3	1.8	K-Ar	59.6938	-134.625	British Columbia	Mihalynuk, M.G.
14607	175.2	1.7	Ar-Ar	59.0166	-132.914	British Columbia	Mihalynuk, M.G., Villeneuve and Cordey, F.
1	53.4	1.6	K-Ar	49	-116.75	Washington & Idaho	Miller and Engels 1975
3	53.5	1.6	K-Ar	48.9833	-116.667	Washington & Idaho	Miller and Engels 1975
5	87.6	2.6	K-Ar	48.9	-116.383	Washington & Idaho	Miller and Engels 1975
6	98	2.9	K-Ar	48.8333	-116.3	Washington & Idaho	Miller and Engels 1975
7	80.1	2.4	K-Ar	48.8167	-116.367	Washington & Idaho	Miller and Engels 1975
9	50.8	1.5	K-Ar	48.7167	-116.483	Washington & Idaho	Miller and Engels 1975
10	87.1	2.6	K-Ar	48.7	-116.317	Washington & Idaho	Miller and Engels 1975
11	53.1	1.6	K-Ar	48.7667	-116.733	Washington & Idaho	Miller and Engels 1975
12	51.5	1.5	K-Ar	48.9	-116.767	Washington & Idaho	Miller and Engels 1975
13	68	2	K-Ar	48.95	-116.867	Washington & Idaho	Miller and Engels 1975
14	98.1	2.9	K-Ar	48.9833	-116.9	Washington & Idaho	Miller and Engels 1975
15	104	3.1	K-Ar	48.9667	-116.95	Washington & Idaho	Miller and Engels 1975
16	108	3.2	K-Ar	48.9333	-116.95	Washington & Idaho	Miller and Engels 1975
17	60.7	1.8	K-Ar	48.85	-116.883	Washington & Idaho	Miller and Engels 1975
18	66.7	2	K-Ar	48.85	-116.95	Washington & Idaho	Miller and Engels 1975
19	87.2	2.6	K-Ar	48.7	-116.9	Washington & Idaho	Miller and Engels 1975
20	84.6	2.5	K-Ar	48.7167	-117.067	Washington & Idaho	Miller and Engels 1975
22	96.6	2.9	K-Ar	48.8	-117.217	Washington & Idaho	Miller and Engels 1975
23	96.3	2.9	K-Ar	48.8	-117.35	Washington & Idaho	Miller and Engels 1975
24	101	3	K-Ar	48.7167	-117.333	Washington & Idaho	Miller and Engels 1975
25	97.9	2.9	K-Ar	48.6667	-117.283	Washington & Idaho	Miller and Engels 1975
26	78.5	2.4	K-Ar	48.75	-117.467	Washington & Idaho	Miller and Engels 1975
27	91	3	K-Ar	48.7833	-117.517	Washington & Idaho	Miller and Engels 1975
28	92.2	3	K-Ar	48.7333	-117.55	Washington & Idaho	Miller and Engels 1975
29	100	2.8	K-Ar	48.7333	-117.85	Washington & Idaho	Miller and Engels 1975
30	79	3	K-Ar	48.65	-117.5	Washington & Idaho	Miller and Engels 1975
31	98	2.9	K-Ar	48.6	-117.583	Washington & Idaho	Miller and Engels 1975
32	96.7	2.9	K-Ar	48.6167	-117.367	Washington & Idaho	Miller and Engels 1975
33	51.2	1.5	K-Ar	48.6	-117.367	Washington & Idaho	Miller and Engels 1975
35	90.9	2.7	K-Ar	48.6	-117.067	Washington & Idaho	Miller and Engels 1975
36	89.8	2.7	K-Ar	48.65	-116.85	Washington & Idaho	Miller and Engels 1975
38	91.9	2.8	K-Ar	48.6167	-116.85	Washington & Idaho	Miller and Engels 1975
42	56.7	1.6	K-Ar	48.4667	-116.433	Washington & Idaho	Miller and Engels 1975
43	76.1	2.1	K-Ar	48.45	-116.333	Washington & Idaho	Miller and Engels 1975
44	73.2	2	K-Ar	48.4167	-116.4	Washington & Idaho	Miller and Engels 1975
45	95.3	2.8	K-Ar	48.4	-116.233	Washington & Idaho	Miller and Engels 1975
46	90.1	2.7	K-Ar	48.3667	-116.417	Washington & Idaho	Miller and Engels 1975
48	56.5	1.7	K-Ar	48.35	-116.5	Washington & Idaho	Miller and Engels 1975
	73.16		Ar-Ar	34.608	-118.976		miller and sutter 1981
	76.59		Ar-Ar	34.6228	-117.127		miller and sutter 1981
BH82NY-99B	69			35.2589	-115.327	California	Miller et al 2014
BH82SP-58	74.5			34.8417	-115.602	California	Miller et al 2014
I-6d	79.9			35.2717	-115.287	California	Miller et al 2014
LKV Std.	92.4			33.757	-117.117	California	Miller et al 2014
M1-4	71.5			34.5361	-117.282	California	Miller et al 2014
M1-7	74.8			34.635	-117.234	California	Miller et al 2014
M10-4	68.3			34.495	-116.826	California	Miller et al 2014
M10-7	78			34.6439	-116.835	California	Miller et al 2014
M100-7	70.1			34.4311	-115.749	California	Miller et al 2014
M101-7	137			34.5608	-115.667	California	Miller et al 2014
M102A-7	158			34.6089	-115.551	California	Miller et al 2014
M103-7	77			34.725	-118.585	California	Miller et al 2014
M104-7	68.8			34.6786	-118.394	California	Miller et al 2014
M105-7	74.8			34.7172	-118.437	California	Miller et al 2014
M107-7	79.6			34.8222	-118.975	California	Miller et al 2014
M108-7	230			35.3941	-117.922	California	Miller et al 2014
M11-4	68.9			34.4414	-116.737	California	Miller et al 2014
M11-7	71.2			34.623	-116.816	California	Miller et al 2014
M12-4	67.6			34.4011	-116.715	California	Miller et al 2014
M12-7	126			34.3083	-116.348	California	Miller et al 2014
M13-4	70			34.5564	-116.905	California	Miller et al 2014
M13-7	116			34.4261	-116.407	California	Miller et al 2014
M13-8	78.6			35.1441	-118.23	California	Miller et al 2014
M14-4	72.2			34.5244	-117.219	California	Miller et al 2014
M14-7	154			34.4592	-116.382	California	Miller et al 2014
M14-8	76			35.2327	-118.105	California	Miller et al 2014
M15-4	69.9			34.4622	-116.629	California	Miller et al 2014
M15-7	70.1			34.0336	-116.593	California	Miller et al 2014
M16-4	67.7			34.4556	-116.553	California	Miller et al 2014
M16-7	64.8			34.227	-117.353	California	Miller et al 2014
M16-8	62.7			34.5983	-115.177	California	Miller et al 2014
M17-4	80.7			34.4711	-116.487	California	Miller et al 2014
M17-7	66.4			34.1508	-117.184	California	Miller et al 2014
M17-8	66.1			34.5292	-115.296	California	Miller et al 2014
M18-4	71.5			34.5103	-116.486	California	Miller et al 2014
M18-8	60.6			34.7186	-115.107	California	Miller et al 2014
M19-4	75			34.5481	-116.579	California	Miller et al 2014
M19-8	66.1			34.485	-115.22	California	Miller et al 2014
M2-4	73.8			34.4758	-117.128	California	Miller et al 2014
M2-7	99.2			34.6528	-117.16	California	Miller et al 2014
M2-8	69.1			35.2208	-117.258	California	Miller et al 2014
M2-9	157			35.4102	-117.867	California	Miller et al 2014
M20-4	78.5			34.3153	-116.397	California	Miller et al 2014
M20-7	74.9			34.6128	-117.119	California	Miller et al 2014
M21-4	122			34.2169	-116.286	California	Miller et al 2014
M22-4	94.6			34.1547	-116.311	California	Miller et al 2014
M22-7	80.4			34.5586	-116.748	California	Miller et al 2014
M23-7	68.4			34.7922	-118.321	California	Miller et al 2014
M24-4	74			34.2361	-116.349	California	Miller et al 2014
M24-7	62.7			35.0383	-118.005	California	Miller et al 2014
M25-4	71			34.2136	-116.446	California	Miller et al 2014
M25-7	73.1			35.0247	-117.876	California	Miller et al 2014
M26-4	74.7			34.5325	-117.71	California	Miller et al 2014
M26-7	73.7			35.0764	-117.771	California	Miller et al 2014
M27-4	74.3			34.6031	-117.811	California	Miller et al 2014
M27-7	59.7			35.0261	-117.638	California	Miller et al 2014
M28-4	82.2			34.6217	-117.628	California	Miller et al 2014
M28-7	70			35.0716	-117.579	California	Miller et al 2014
M29-4	83.2			34.6739	-117.503	California	Miller et al 2014
M29-7	73.5			35.1344	-117.674	California	Miller et al 2014
M3-4	68.4			34.4611	-116.8	California	Miller et al 2014
M3-6	76.1			34.6989	-117.206	California	Miller et al 2014
M3-7	116			34.6225	-117.14	California	Miller et al 2014
M30-4	74.9			34.6169	-117.761	California	Miller et al 2014
M30-7	78.9			35.2472	-117.661	California	Miller et al 2014
M31-4	67.2			34.6414	-117.86	California	Miller et al 2014
M31-7	79.2			35.21	-117.75	California	Miller et al 2014
M32-4	77.5			34.6986	-117.822	California	Miller et al 2014
M32-7	72.5			35.1864	-117.776	California	Miller et al 2014
M33-4	78.3			34.7344	-117.791	California	Miller et al 2014
M33-7	73.9			35.1444	-117.843	California	Miller et al 2014
M33A-7	78.1			35.1569	-117.842	California	Miller et al 2014
M34-4	76.2			34.7061	-117.685	California	Miller et al 2014
M34A-7	80.6			35.2191	-117.818	California	Miller et al 2014
M35-4	74.1			34.7139	-117.595	California	Miller et al 2014
M35-7	76.5			35.2908	-117.784	California	Miller et al 2014
M36-4	74.3			34.5711	-116.836	California	Miller et al 2014
M38-4	149			34.6667	-116.699	California	Miller et al 2014
M39-4	76.4			34.5922	-116.642	California	Miller et al 2014
M39-7	77.5			35.2347	-117.307	California	Miller et al 2014
M4-4	71.5			34.3675	-116.527	California	Miller et al 2014
M4-9	146			35.4275	-117.9	California	Miller et al 2014
M40-4	80			34.5475	-116.702	California	Miller et al 2014
M40-7	80			35.2772	-117.313	California	Miller et al 2014
M41-4	74.2			34.5933	-116.569	California	Miller et al 2014
M41-7	80.2			35.3447	-117.32	California	Miller et al 2014
M42-4	74.4			34.2008	-116.433	California	Miller et al 2014
M42-7	70			34.7822	-117.053	California	Miller et al 2014
M43-4	72.3			34.2197	-116.473	California	Miller et al 2014
M43-7	140			34.798	-116.919	California	Miller et al 2014
M44-4	109			34.2925	-116.357	California	Miller et al 2014
M44-7	71.8			34.7753	-116.811	California	Miller et al 2014
M45-4	163			34.2131	-116.029	California	Miller et al 2014
M45-7	84.3			34.9858	-116.766	California	Miller et al 2014
M46-7	72.4			34.7733	-117.204	California	Miller et al 2014
M47-4	154			34.2103	-116.241	California	Miller et al 2014
M49-7	83.2			34.8605	-117.353	California	Miller et al 2014
M5-4	68.2			34.2714	-116.49	California	Miller et al 2014
M5-7	145			34.7136	-116.94	California	Miller et al 2014
M50-7	69.3			34.9541	-117.898	California	Miller et al 2014
M51-7	69.4			34.8791	-117.978	California	Miller et al 2014
M52-7	77.2			34.778	-117.863	California	Miller et al 2014
M53-7	73.75			34.7972	-117.562	California	Miller et al 2014
M54-7	74.9			34.8041	-117.727	California	Miller et al 2014
M55-7	68.5			35.0805	-116.39	California	Miller et al 2014
M56-7	64.2			35.0986	-116.263	California	Miller et al 2014
M57-7	67.4			35.0953	-116.268	California	Miller et al 2014
M58-7	83.1			35.0561	-116.625	California	Miller et al 2014
M59-7	74.9			35.1197	-116.806	California	Miller et al 2014
M6-4	73.7			34.545	-117.088	California	Miller et al 2014
M6-7	134			34.6861	-116.912	California	Miller et al 2014
M60-7	81			35.2227	-116.728	California	Miller et al 2014
M61-7	69.7			35.3214	-116.611	California	Miller et al 2014
M62-7	71.4			35.1614	-116.764	California	Miller et al 2014
M63-7	75.3			35.0547	-116.983	California	Miller et al 2014
M64-7	77			35.0977	-117.063	California	Miller et al 2014
M66-7	132			34.8236	-116.336	California	Miller et al 2014
M67-7	126			34.8903	-116.224	California	Miller et al 2014
M69-7	67.7			34.0831	-116.255	California	Miller et al 2014
M7-4	86			34.5958	-117.183	California	Miller et al 2014
M7-7	99.6			34.6922	-116.889	California	Miller et al 2014
M7-8	146			34.0028	-115.707	California	Miller et al 2014
M70-7	67.3			34.0272	-116.303	California	Miller et al 2014
M72-7	93.3			34.0725	-116.036	California	Miller et al 2014
M73-7	81.5			34.0236	-116.072	California	Miller et al 2014
M74-7	68.9			33.9275	-116.172	California	Miller et al 2014
M76-7	67.6			33.6842	-115.966	California	Miller et al 2014
M77-7	79.8			33.6322	-115.811	California	Miller et al 2014
M78-7	75			33.662	-115.672	California	Miller et al 2014
M79-7	144			33.8103	-115.44	California	Miller et al 2014
M8-4	83.4			34.5536	-117.228	California	Miller et al 2014
M8-8	67.6			34.0753	-115.568	California	Miller et al 2014
M80-7	145			33.8103	-115.44	California	Miller et al 2014
M80BR-79	114			34.6678	-115.784	California	Miller et al 2014
M81-7	107			34.743	-115.484	California	Miller et al 2014
M81LH-14	130			34.6239	-115.83	California	Miller et al 2014
M81LH-16	116			34.6342	-115.83	California	Miller et al 2014
M82-7	72.2			33.6995	-115.804	California	Miller et al 2014
M82BR-03	74.3			34.6958	-115.843	California	Miller et al 2014
M82CO-138	146			34.9436	-115.406	California	Miller et al 2014
M82SP-75	157			34.9233	-115.566	California	Miller et al 2014
M83-7	69.1			33.8845	-115.798	California	Miller et al 2014
M84-7	69.5			33.7845	-115.767	California	Miller et al 2014
M85-7	72.2			33.8845	-115.822	California	Miller et al 2014
M87-7	62.8			35.3222	-117.612	California	Miller et al 2014
M89NY-10	94.4			35.4797	-115.179	California	Miller et al 2014
M9-4	72.4			34.5733	-117.322	California	Miller et al 2014
M9-8	65.1			34.1133	-115.527	California	Miller et al 2014
M91-7	137			35.5341	-117.582	California	Miller et al 2014
M92-7	70.4			35.2947	-117.706	California	Miller et al 2014
M95-7	61			33.8156	-114.863	California	Miller et al 2014
M95-7	62.5			33.8156	-114.863	California	Miller et al 2014
M96-7	148			34.1925	-116.024	California	Miller et al 2014
M97-7	154			34.1908	-115.916	California	Miller et al 2014
M98-7	67.7			34.2	-115.723	California	Miller et al 2014
M99-7	65.9			34.255	-115.72	California	Miller et al 2014
MH-172	53.9			35.1289	-115.36	California	Miller et al 2014
MH-27	83.5			35.1255	-115.45	California	Miller et al 2014
MH-4	95.2			35.1672	-115.317	California	Miller et al 2014
MH-75	73.4			35.23	-115.358	California	Miller et al 2014
MH-9	88.7			35.1394	-115.404	California	Miller et al 2014
Ncl-Mc#1	108			33.9314	-117.614	California	Miller et al 2014
P1-5	100			33.9314	-117.527	California	Miller et al 2014
P1-6	63.4			33.715	-116.299	California	Miller et al 2014
P1-7	94.2			33.6236	-117.171	California	Miller et al 2014
P1-8	104			33.9192	-117.552	California	Miller et al 2014
P10-5	109			33.7395	-117.349	California	Miller et al 2014
P10-6	84.7			33.5767	-116.823	California	Miller et al 2014
P11-5	99.7			33.7833	-117.311	California	Miller et al 2014
P11-6	91.5			33.5436	-116.964	California	Miller et al 2014
P12-5	94.7			33.8272	-117.265	California	Miller et al 2014
P12-6	90.1			33.4134	-116.798	California	Miller et al 2014
P13-5	86.8			33.87	-117.044	California	Miller et al 2014
P13-6	89.4			33.3514	-116.911	California	Miller et al 2014
P14-5	87.9			33.8247	-116.975	California	Miller et al 2014
P14-6	88			33.4678	-116.923	California	Miller et al 2014
P15-5	89.8			33.7317	-116.924	California	Miller et al 2014
P15-6	94.8			33.4142	-117.096	California	Miller et al 2014
P16-5	91.3			33.6711	-116.971	California	Miller et al 2014
P16-6	98.4			33.2823	-117.056	California	Miller et al 2014
P17-5	89.6			33.5764	-117.097	California	Miller et al 2014
P17-6	105			33.2178	-117.161	California	Miller et al 2014
P18-5	91.1			33.6397	-117.084	California	Miller et al 2014
P19-5	92.9			33.9078	-117.372	California	Miller et al 2014
P19-6	105.567			33.2675	-117.294	California	Miller et al 2014
P2-3	87.8			33.7847	-117.083	California	Miller et al 2014
P2-5	97.3			34.0309	-117.499	California	Miller et al 2014
P2-6	65.6			33.6684	-116.383	California	Miller et al 2014
P2-7	104			33.3231	-117.168	California	Miller et al 2014
P2-8	84.2			33.9528	-117.511	California	Miller et al 2014
P20-5	104			33.8511	-117.458	California	Miller et al 2014
P21-5	102			33.9825	-117.446	California	Miller et al 2014
P22-5	108			33.8397	-117.515	California	Miller et al 2014
P23-5	89.5			34.0639	-117.345	California	Miller et al 2014
P24-5	82.2			33.9872	-117.226	California	Miller et al 2014
P25-5	92.4			33.9561	-117.305	California	Miller et al 2014
P25-6	108			33.0581	-117.089	California	Miller et al 2014
P26-5	95.1			33.9845	-117.389	California	Miller et al 2014
P27-5	86.3			33.8995	-116.986	California	Miller et al 2014
P28-5	86.1			33.8964	-116.904	California	Miller et al 2014
P29-5	81.1			33.9061	-116.864	California	Miller et al 2014
P3-5	103			34.0189	-117.416	California	Miller et al 2014
P3-6	61.3			33.7239	-116.475	California	Miller et al 2014
P3-7	106			33.2592	-117.268	California	Miller et al 2014
P3-8	93.6			34.0197	-117.385	California	Miller et al 2014
P30-5	85.5			33.8531	-116.821	California	Miller et al 2014
P31-5	83			33.8014	-116.78	California	Miller et al 2014
P32-5	86.3			33.7497	-116.736	California	Miller et al 2014
P33-5	86.9			33.7034	-116.767	California	Miller et al 2014
P34-5	78.6			33.8617	-116.726	California	Miller et al 2014
P35-5	72.8			33.9031	-116.7	California	Miller et al 2014
P36-5	70.7			33.8809	-116.643	California	Miller et al 2014
P37-5	71.2			33.8089	-116.641	California	Miller et al 2014
P38-5	68			33.8122	-116.577	California	Miller et al 2014
P39-5	73			33.7689	-116.593	California	Miller et al 2014
P4-3	59.9			33.7911	-116.49	California	Miller et al 2014
P4-5	86.7			33.9089	-117.133	California	Miller et al 2014
P4-6	66.9			33.6281	-116.454	California	Miller et al 2014
P40-5	88			33.7575	-116.806	California	Miller et al 2014
P41-5	86.2			33.7989	-116.862	California	Miller et al 2014
P42-5	87.7			33.8511	-116.923	California	Miller et al 2014
P43-5	80.9			33.8878	-116.798	California	Miller et al 2014
P44-5	101			33.5995	-117.298	California	Miller et al 2014
P45-5	103			33.537	-117.276	California	Miller et al 2014
P46-5	108			33.5048	-117.36	California	Miller et al 2014
P47-5	114.5			33.5003	-117.433	California	Miller et al 2014
P48-5	128			33.592	-117.508	California	Miller et al 2014
P49-5	114			33.6161	-117.443	California	Miller et al 2014
P5-5R	89.7			33.8661	-117.208	California	Miller et al 2014
P5-6	80			33.5636	-116.588	California	Miller et al 2014
P50-5	109			33.6553	-117.389	California	Miller et al 2014
P51-5	116			33.715	-117.52	California	Miller et al 2014
P52-5	110			33.7211	-117.473	California	Miller et al 2014
P6-5	85.4			33.7964	-117.039	California	Miller et al 2014
P6-6	84.4			33.5575	-116.629	California	Miller et al 2014
P7-5	96.4			33.7208	-117.161	California	Miller et al 2014
P7-6	83.5			33.6617	-116.615	California	Miller et al 2014
P8-5	95.9			33.6753	-117.206	California	Miller et al 2014
P8-6	84.8			33.6328	-116.706	California	Miller et al 2014
P81LH-47	73			34.6597	-115.848	California	Miller et al 2014
P9-5	109			33.6481	-117.284	California	Miller et al 2014
P9-6	81.4			33.4878	-116.708	California	Miller et al 2014
PA-6	96.5			34.0436	-117.772	California	Miller et al 2014
S22-84-3	84.5			33.2106	-116.496	California	Miller et al 2014
S22-87-3	81.3			33.2109	-116.443	California	Miller et al 2014
S22-92-3	77.2			33.2281	-116.412	California	Miller et al 2014
T1-4	70			34.2992	-117.453	California	Miller et al 2014
T1-5	71.1			34.1639	-118.232	California	Miller et al 2014
T1-6	65			34.1669	-117.815	California	Miller et al 2014
T1-7	100			34.1083	-118.361	California	Miller et al 2014
T10-4	72.2			34.1667	-116.944	California	Miller et al 2014
T100-4	69.4			34.435	-117.751	California	Miller et al 2014
T101-4	71.8			34.4247	-117.766	California	Miller et al 2014
T102-4	73.3			34.4642	-117.865	California	Miller et al 2014
T103-4	73			34.1803	-117.66	California	Miller et al 2014
T104-4	75.3			34.2006	-117.661	California	Miller et al 2014
T105-4	71.8			34.1669	-117.815	California	Miller et al 2014
T11-4	69.7			34.1128	-117.979	California	Miller et al 2014
T12-4	66.1			34.1847	-117.146	California	Miller et al 2014
T13-4	70.5			34.2158	-117.076	California	Miller et al 2014
T14-4	73.9			34.2495	-117.021	California	Miller et al 2014
T15-4	69.5			34.215	-117.127	California	Miller et al 2014
T16-4	69.5			34.2595	-117.153	California	Miller et al 2014
T18-4	66.6			34.2281	-117.246	California	Miller et al 2014
T19-3	71.4			34.2719	-117.584	California	Miller et al 2014
T19-4	68.1			34.1475	-116.48	California	Miller et al 2014
T2-4	70.6			34.3089	-117.346	California	Miller et al 2014
T2-5	98.6			34.1083	-118.361	California	Miller et al 2014
T2-6	57.8			34.2317	-117.978	California	Miller et al 2014
T21-3	81.3			34.3906	-117.128	California	Miller et al 2014
T3-4	69.3			34.3111	-117.277	California	Miller et al 2014
T30-4	70.7			34.3231	-116.841	California	Miller et al 2014
T31A-4	82			34.3039	-116.99	California	Miller et al 2014
T32-4	71.5			34.2736	-116.951	California	Miller et al 2014
T34-4	65.1			34.2642	-118.125	California	Miller et al 2014
T36-4	65.3			34.3425	-117.985	California	Miller et al 2014
T37-4	58.5			34.3475	-117.851	California	Miller et al 2014
T38-4	79.1			34.3794	-118.033	California	Miller et al 2014
T4-3	71			34.2036	-117.496	California	Miller et al 2014
T41-4	59.8			34.3	-117.834	California	Miller et al 2014
T43-4	79.9			34.3639	-117.093	California	Miller et al 2014
T44-4	72.4			34.3939	-117.054	California	Miller et al 2014
T45-4	70.1			34.3358	-116.691	California	Miller et al 2014
T46-4	70.8			34.1647	-117.907	California	Miller et al 2014
T47-4	71.7			34.1725	-117.992	California	Miller et al 2014
T48-4	60.8			34.1931	-118.02	California	Miller et al 2014
T49-4	71.4			34.1933	-118.178	California	Miller et al 2014
T5-4	68.5			34.3311	-116.829	California	Miller et al 2014
T50-4	70.3			34.2286	-118.185	California	Miller et al 2014
T51-4	70			34.1642	-116.579	California	Miller et al 2014
T52-4	69.2			34.1792	-116.656	California	Miller et al 2014
T53-4	70.1			34.2683	-117.289	California	Miller et al 2014
T54-4	71.1			34.2689	-117.072	California	Miller et al 2014
T55-4	70			34.2	-116.95	California	Miller et al 2014
T56-4	72.6			34.3233	-116.599	California	Miller et al 2014
T57-4	70.5			34.3486	-116.605	California	Miller et al 2014
T58-4	70.1			34.2672	-116.557	California	Miller et al 2014
T59-4	69.7			34.205	-116.595	California	Miller et al 2014
T60-4	68			34.1492	-116.725	California	Miller et al 2014
T61-4	65			34.2867	-116.763	California	Miller et al 2014
T62-4	69.5			34.2603	-116.702	California	Miller et al 2014
T63-4	66.2			34.2553	-116.736	California	Miller et al 2014
T64-4	68.4			34.2586	-116.869	California	Miller et al 2014
T65-4	69.4			34.3236	-117.201	California	Miller et al 2014
T66-4	67.2			34.1669	-117.142	California	Miller et al 2014
T67-4	56.6			34.2317	-117.978	California	Miller et al 2014
T68-4	64.2			34.2439	-117.908	California	Miller et al 2014
T70-4	62.3			34.2272	-117.776	California	Miller et al 2014
T71-4	60			34.2231	-117.728	California	Miller et al 2014
T72-4	72.8			34.2433	-117.643	California	Miller et al 2014
T73-4	68.3			34.18	-117.675	California	Miller et al 2014
T74-4	70.5			34.1825	-117.629	California	Miller et al 2014
T75-4	74.5			34.2025	-117.562	California	Miller et al 2014
T76-4	71			34.2911	-118.288	California	Miller et al 2014
T77-4	68			34.2833	-118.207	California	Miller et al 2014
T78-4	64.7			34.2247	-118.056	California	Miller et al 2014
T79-4	64.6			34.2436	-118.092	California	Miller et al 2014
T8-4	71.6			34.1978	-116.723	California	Miller et al 2014
T80-4	66.4			34.3094	-118.141	California	Miller et al 2014
T82-4	66.6			34.4178	-117.975	California	Miller et al 2014
T83-4	64.6			34.3872	-117.977	California	Miller et al 2014
T84-4	63			34.3597	-117.794	California	Miller et al 2014
T85-4	71.1			34.2347	-117.45	California	Miller et al 2014
T86-4	69.9			34.2511	-117.545	California	Miller et al 2014
T89-4	71			34.38	-116.902	California	Miller et al 2014
T9-4	72.1			34.1689	-116.771	California	Miller et al 2014
T90-4	87.3			34.5764	-117.063	California	Miller et al 2014
T91-4	106			34.6836	-117.082	California	Miller et al 2014
T92-4	75			34.6539	-117.058	California	Miller et al 2014
T93-4	77.7			34.6725	-116.966	California	Miller et al 2014
T95-4	74			34.5367	-116.96	California	Miller et al 2014
T96-4	70.8			34.3595	-116.928	California	Miller et al 2014
T97-4	70.2			34.4631	-116.883	California	Miller et al 2014
T98-4	69.6			34.3744	-117.608	California	Miller et al 2014
T99-4	70.8			34.4058	-117.674	California	Miller et al 2014
TA-6	59.1			34.0364	-116.794	California	Miller et al 2014
TC-6	90.4			34.0758	-116.761	California	Miller et al 2014
WT-2	87.8			34.1531	-118.289	California	Miller et al 2014
13797	90.1	6.4	K-Ar	50.1302	-123.138	British Columbia	Miller, J.H.L.
10433	209	14	K-Ar	58.0115	-130.98	British Columbia	Morgan, J.T.
14106	161	10	K-Ar	50.6881	-127.772	British Columbia	Muller, J.E., Northcote, K.E. and Carlisle, D.
14107	169	10	K-Ar	50.8303	-128.074	British Columbia	Muller, J.E., Northcote, K.E. and Carlisle, D.
14109	156	12	K-Ar	50.5928	-127.422	British Columbia	Muller, J.E., Northcote, K.E. and Carlisle, D.
14111	166	12	K-Ar	50.711	-127.839	British Columbia	Muller, J.E., Northcote, K.E. and Carlisle, D.
14112	171	12	K-Ar	50.7178	-127.877	British Columbia	Muller, J.E., Northcote, K.E. and Carlisle, D.
14116	148	10	K-Ar	50.6951	-127.878	British Columbia	Muller, J.E., Northcote, K.E. and Carlisle, D.
14117	51.5	3.4	K-Ar	50.8215	-128.202	British Columbia	Muller, J.E., Northcote, K.E. and Carlisle, D.
pb105	74.47	0.15	Ar-Ar	46.3155	-113.182	Monatana	Naibert el al 2010
pb111	67.32	0.12	Ar-Ar	46.3023	-113.114	Monatana	Naibert el al 2010
pb122	74.81	0.14	Ar-Ar	46.3562	-113.152	Monatana	Naibert el al 2010
pb17	65.43	0.14	Ar-Ar	46.3196	-113.095	Monatana	Naibert el al 2010
pb19	75.56	0.2	Ar-Ar	46.2784	-113.188	Monatana	Naibert el al 2010
pb30	73.53	0.13	Ar-Ar	46.3234	-113.114	Monatana	Naibert el al 2010
pb4	73.96	0.17	Ar-Ar	46.301	-113.147	Monatana	Naibert el al 2010
pb42	74.57	0.16	Ar-Ar	46.3539	-113.231	Monatana	Naibert el al 2010
pb50	74.82	0.13	Ar-Ar	46.293	-113.247	Monatana	Naibert el al 2010
pb73	75.02	0.14	Ar-Ar	46.3162	-113.271	Monatana	Naibert el al 2010
pb76	74.85	0.14	Ar-Ar	46.3166	-113.243	Monatana	Naibert el al 2010
pb81	74.82	0.21	Ar-Ar	46.3184	-113.215	Monatana	Naibert el al 2010
pb97	74.74	0.18	Ar-Ar	46.2897	-113.184	Monatana	Naibert el al 2010
13851	150	10	K-Ar	50.4195	-125.866	British Columbia	Nelson, J.L.
13852	177	12	K-Ar	50.4373	-125.904	British Columbia	Nelson, J.L.
13853	162	12	K-Ar	50.3845	-125.679	British Columbia	Nelson, J.L.
12782	152	10	K-Ar	49.8866	-117.237	British Columbia	Nguyen, K.K., Sinclair, A.J. and Libby, W.G.
12898	153	12	K-Ar	49.8958	-117.241	British Columbia	Nguyen, K.K., Sinclair, A.J. and Libby, W.G.
13073	122	10	K-Ar	49.8874	-117.108	British Columbia	Nguyen, K.K., Sinclair, A.J. and Libby, W.G.
13075	148	10	K-Ar	49.8821	-117.112	British Columbia	Nguyen, K.K., Sinclair, A.J. and Libby, W.G.
13076	132	10	K-Ar	49.7328	-117.164	British Columbia	Nguyen, K.K., Sinclair, A.J. and Libby, W.G.
13804	134	12	K-Ar	49.9015	-120.021	British Columbia	Oriel, W.M.
13805	147	12	K-Ar	49.8832	-120.015	British Columbia	Oriel, W.M.
13806	147	10	K-Ar	49.8799	-120.003	British Columbia	Oriel, W.M.
13809	156	8	K-Ar	49.9082	-120.051	British Columbia	Oriel, W.M.
13810	177	14	K-Ar	49.9082	-120.008	British Columbia	Oriel, W.M.
13811	138	12	K-Ar	49.9115	-120.008	British Columbia	Oriel, W.M.
13812	143	12	K-Ar	49.9082	-120.011	British Columbia	Oriel, W.M.
N/A	50		Ar-Ar	31.375	-115.67	Mexico	Ortega-Rivera 2003
N/A	51		Ar-Ar	31.375	-115.667	Mexico	Ortega-Rivera 2003
N/A	52		Ar-Ar	31.31	-115.476	Mexico	Ortega-Rivera 2003
N/A	53		Ar-Ar	31.073	-114.873	Mexico	Ortega-Rivera 2003
N/A	54		Ar-Ar	31.05	-114.859	Mexico	Ortega-Rivera 2003
N/A	55		Ar-Ar	30.914	-114.73	Mexico	Ortega-Rivera 2003
N/A	56		Ar-Ar	32.208	-115.935	Mexico	Ortega-Rivera 2003
N/A	57		Ar-Ar	32.214	-115.902	Mexico	Ortega-Rivera 2003
N/A	58		Ar-Ar	32.263	-115.941	Mexico	Ortega-Rivera 2003
N/A	59		Ar-Ar	32.309	-115.907	Mexico	Ortega-Rivera 2003
N/A	60		Ar-Ar	32.288	-115.88	Mexico	Ortega-Rivera 2003
N/A	61		Ar-Ar	32.06	-115.943	Mexico	Ortega-Rivera 2003
N/A	62		Ar-Ar	32.049	-115.917	Mexico	Ortega-Rivera 2003
N/A	63		Ar-Ar	32	-115.877	Mexico	Ortega-Rivera 2003
N/A	64		Ar-Ar	31.951	-115.855	Mexico	Ortega-Rivera 2003
N/A	65		Ar-Ar	29.762	-114.745	Mexico	Ortega-Rivera 2003
N/A	66		Ar-Ar	29.592	-114.393	Mexico	Ortega-Rivera 2003
N/A	67		Ar-Ar	29.583	-114.376	Mexico	Ortega-Rivera 2003
N/A	68		Ar-Ar	28.142	-113.483	Mexico	Ortega-Rivera 2003
N/A	69		Ar-Ar	28.297	-113.098	Mexico	Ortega-Rivera 2003
N/A	70		Ar-Ar	28.375	-113.115	Mexico	Ortega-Rivera 2003
N/A	72		Ar-Ar	30.35	-115.667	Mexico	Ortega-Rivera 2003
N/A	73		Ar-Ar	30.358	-115.655	Mexico	Ortega-Rivera 2003
N/A	74		Ar-Ar	30.375	-115.61	Mexico	Ortega-Rivera 2003
N/A	75		Ar-Ar	30.383	-115.594	Mexico	Ortega-Rivera 2003
N/A	76		Ar-Ar	30.408	-115.551	Mexico	Ortega-Rivera 2003
N/A	77		Ar-Ar	30.483	-115.497	Mexico	Ortega-Rivera 2003
N/A	78		Ar-Ar	30.486	-115.466	Mexico	Ortega-Rivera 2003
N/A	79		Ar-Ar	30.533	-115.417	Mexico	Ortega-Rivera 2003
N/A	80		Ar-Ar	30.567	-115.384	Mexico	Ortega-Rivera 2003
N/A	81		Ar-Ar	30.967	-115.784	Mexico	Ortega-Rivera 2003
N/A	82		Ar-Ar	30.982	-115.701	Mexico	Ortega-Rivera 2003
N/A	83		Ar-Ar	31.342	-116.422	Mexico	Ortega-Rivera 2003
N/A	84		Ar-Ar	31.347	-116.418	Mexico	Ortega-Rivera 2003
N/A	85		Ar-Ar	31.364	-116.431	Mexico	Ortega-Rivera 2003
N/A	86		Ar-Ar	31.374	-116.449	Mexico	Ortega-Rivera 2003
N/A	87		Ar-Ar	31.374	-116.451	Mexico	Ortega-Rivera 2003
N/A	88		Ar-Ar	31.644	-116.468	Mexico	Ortega-Rivera 2003
N/A	89		Ar-Ar	31.66	-116.421	Mexico	Ortega-Rivera 2003
N/A	90		Ar-Ar	31.656	-116.434	Mexico	Ortega-Rivera 2003
N/A	91		Ar-Ar	31.657	-116.435	Mexico	Ortega-Rivera 2003
N/A	92		Ar-Ar	31.548	-116.382	Mexico	Ortega-Rivera 2003
N/A	93		Ar-Ar	31.65	-116.168	Mexico	Ortega-Rivera 2003
N/A	94		Ar-Ar	31.667	-116.131	Mexico	Ortega-Rivera 2003
N/A	95		Ar-Ar	31.683	-116.076	Mexico	Ortega-Rivera 2003
N/A	96		Ar-Ar	31.683	-116.297	Mexico	Ortega-Rivera 2003
N/A	97		Ar-Ar	31.725	-116.711	Mexico	Ortega-Rivera 2003
N/A	98		Ar-Ar	31.86	-116.631	Mexico	Ortega-Rivera 2003
N/A	99		Ar-Ar	32.006	-116.619	Mexico	Ortega-Rivera 2003
N/A	100		Ar-Ar	32.215	-116.292	Mexico	Ortega-Rivera 2003
N/A	101		Ar-Ar	33.84	-117.641	Mexico	Ortega-Rivera 2003
N/A	102		Ar-Ar	33.754	-117.541	Mexico	Ortega-Rivera 2003
N/A	103		Ar-Ar	33.798	-117.615	Mexico	Ortega-Rivera 2003
N/A	104		Ar-Ar	33.821	-117.605	Mexico	Ortega-Rivera 2003
N/A	105		Ar-Ar	33.157	-117.121	Mexico	Ortega-Rivera 2003
N/A	106		Ar-Ar	33.133	-117.124	Mexico	Ortega-Rivera 2003
N/A	107		Ar-Ar	33.106	-117.123	Mexico	Ortega-Rivera 2003
N/A	108		Ar-Ar	33.08	-117.124	Mexico	Ortega-Rivera 2003
N/A	109		Ar-Ar	33.933	-117.461	Mexico	Ortega-Rivera 2003
N/A	110		Ar-Ar	33.384	-117.161	Mexico	Ortega-Rivera 2003
N/A	111		Ar-Ar	33.36	-117.168	Mexico	Ortega-Rivera 2003
N/A	112		Ar-Ar	31.173	-117.132	Mexico	Ortega-Rivera 2003
N/A	113		Ar-Ar	32.991	-116.949	Mexico	Ortega-Rivera 2003
N/A	114		Ar-Ar	33.086	-116.951	Mexico	Ortega-Rivera 2003
N/A	115		Ar-Ar	33.067	-116.855	Mexico	Ortega-Rivera 2003
N/A	116		Ar-Ar	33.067	-116.834	Mexico	Ortega-Rivera 2003
N/A	117		Ar-Ar	32.815	-117.08	Mexico	Ortega-Rivera 2003
N/A	118		Ar-Ar	32.879	-116.88	Mexico	Ortega-Rivera 2003
N/A	119		Ar-Ar	32.907	-116.878	Mexico	Ortega-Rivera 2003
N/A	120		Ar-Ar	32.846	-116.881	Mexico	Ortega-Rivera 2003
N/A	121		Ar-Ar	32.899	-116.83	Mexico	Ortega-Rivera 2003
N/A	122		Ar-Ar	32.781	-116.795	Mexico	Ortega-Rivera 2003
N/A	123		Ar-Ar	32.817	-116.768	Mexico	Ortega-Rivera 2003
N/A	124		Ar-Ar	32.817	-116.751	Mexico	Ortega-Rivera 2003
N/A	125		Ar-Ar	32.835	-116.749	Mexico	Ortega-Rivera 2003
N/A	126		Ar-Ar	32.836	-116.751	Mexico	Ortega-Rivera 2003
N/A	127		Ar-Ar	32.901	-116.818	Mexico	Ortega-Rivera 2003
N/A	128		Ar-Ar	32.906	-116.819	Mexico	Ortega-Rivera 2003
N/A	129		Ar-Ar	32.907	-116.822	Mexico	Ortega-Rivera 2003
N/A	130		Ar-Ar	32.839	-116.656	Mexico	Ortega-Rivera 2003
N/A	131		Ar-Ar	32.821	-116.593	Mexico	Ortega-Rivera 2003
N/A	132		Ar-Ar	32.692	-116.585	Mexico	Ortega-Rivera 2003
N/A	133		Ar-Ar	32.749	-116.575	Mexico	Ortega-Rivera 2003
N/A	134		Ar-Ar	32.71	-116.511	Mexico	Ortega-Rivera 2003
N/A	135		Ar-Ar	32.936	-116.618	Mexico	Ortega-Rivera 2003
N/A	136		Ar-Ar	32.813	-116.511	Mexico	Ortega-Rivera 2003
N/A	137		Ar-Ar	32.732	-116.576	Mexico	Ortega-Rivera 2003
N/A	138		Ar-Ar	32.732	-116.576	Mexico	Ortega-Rivera 2003
N/A	139		Ar-Ar	33.894	-117.46	Mexico	Ortega-Rivera 2003
N/A	140		Ar-Ar	33.836	-117.457	Mexico	Ortega-Rivera 2003
N/A	141		Ar-Ar	32.65	-116.659	Mexico	Ortega-Rivera 2003
N/A	142		Ar-Ar	32.641	-116.634	Mexico	Ortega-Rivera 2003
N/A	143		Ar-Ar	32.658	-116.626	Mexico	Ortega-Rivera 2003
N/A	144		Ar-Ar	32.603	-116.543	Mexico	Ortega-Rivera 2003
N/A	145		Ar-Ar	32.683	-116.576	Mexico	Ortega-Rivera 2003
N/A	147		Ar-Ar	32.645	-116.526	Mexico	Ortega-Rivera 2003
N/A	148		Ar-Ar	32.658	-116.509	Mexico	Ortega-Rivera 2003
N/A	149		Ar-Ar	32.63	-116.514	Mexico	Ortega-Rivera 2003
CONT-1.1	93.1	1.2	K-Ar	30.969	-115.62	Baja California	Ortega-Rivera et al 1997
CONT-1.A	93.1	1	K-Ar	30.969	-115.62	Baja California	Ortega-Rivera et al 1997
CONT-2-90	94.55	0.95	K-Ar	30.969	-115.627	Baja California	Ortega-Rivera et al 1997
CORE	88.1333	0.666667	K-Ar	30.892	-115.43	Baja California	Ortega-Rivera et al 1997
CORONA	90.5	0.6	K-Ar	30.997	-115.557	Baja California	Ortega-Rivera et al 1997
CT-47	89.4	0.8	K-Ar	30.931	-115.484	Baja California	Ortega-Rivera et al 1997
E.8-20.6	89.25	0.65	K-Ar	30.982	-115.517	Baja California	Ortega-Rivera et al 1997
G.4-90-3	88.4	0.9	K-Ar	30.982	-115.511	Baja California	Ortega-Rivera et al 1997
SSPM-13	92.6	0.7	Ar-Ar	30.991	-115.567	Baja California	Ortega-Rivera et al 1997
SSPM-18	87.2	0.3	Ar-Ar	31.041	-115.471	Baja California	Ortega-Rivera et al 1997
SSPM-20	88.6	0.7	Ar-Ar	30.969	-115.513	Baja California	Ortega-Rivera et al 1997
SSPM-21	88.4	0.9	Ar-Ar	30.949	-115.511	Baja California	Ortega-Rivera et al 1997
SSPM-7-24-1-88	92.3	0.5	K-Ar	30.948	-115.441	Baja California	Ortega-Rivera et al 1997
SSPM-7-24-2-88	87.55	1.25	K-Ar	30.953	-115.434	Baja California	Ortega-Rivera et al 1997
SSPM-7-24-3-88	88.55	0.95	K-Ar	30.959	-115.433	Baja California	Ortega-Rivera et al 1997
SSPM-7-25-4(88)	89.6333	0.666667	K-Ar	30.952	-115.495	Baja California	Ortega-Rivera et al 1997
SSPM-7-26-2-88	90.6	0.6	K-Ar	30.961	-115.512	Baja California	Ortega-Rivera et al 1997
SSPM-7-26-3	89.45	1.1	K-Ar	30.963	-115.516	Baja California	Ortega-Rivera et al 1997
SSPM-7-26-4-88	89.9	0.6	K-Ar	31.014	-115.524	Baja California	Ortega-Rivera et al 1997
SSPM-7-26-6-88	91.5	0.8	K-Ar	30.995	-115.56	Baja California	Ortega-Rivera et al 1997
SSPM-7-26-7-88	91.4	0.7	K-Ar	30.986	-115.575	Baja California	Ortega-Rivera et al 1997
SSPM-G.0-20	87.8	1.15	K-Ar	30.945	-115.49	Baja California	Ortega-Rivera et al 1997
SSPM-G.0-29	89.4	1.3	K-Ar	30.954	-115.494	Baja California	Ortega-Rivera et al 1997
SSPM-G.1.26	89.9	0.9	K-Ar	30.965	-115.51	Baja California	Ortega-Rivera et al 1997
SSPM-G.4-24.3	90.7	0.9	K-Ar	30.965	-115.51	Baja California	Ortega-Rivera et al 1997
SSPM-H.9-14.5	90.9	0.8	K-Ar	30.992	-115.553	Baja California	Ortega-Rivera et al 1997
SSPM-LV-8	87.05	0.45	K-Ar	30.876	-115.526	Baja California	Ortega-Rivera et al 1997
SSPM-VO-15	89	0.75	K-Ar	31.033	-115.474	Baja California	Ortega-Rivera et al 1997
SSPM-VO-15-4	91.2	0.9	K-Ar	31.033	-115.474	Baja California	Ortega-Rivera et al 1997
SSPM-VO-16.1	86.3	0.3	K-Ar	31.033	-115.477	Baja California	Ortega-Rivera et al 1997
SSPM-VO-17-2	85.1	1.2	K-Ar	31.035	-115.476	Baja California	Ortega-Rivera et al 1997
SSPM-VO-17-A	60.6	0.9	K-Ar	31.034	-115.474	Baja California	Ortega-Rivera et al 1997
SSPM-VO-9	90	0.8	K-Ar	31.022	-115.477	Baja California	Ortega-Rivera et al 1997
WC-(2M)	93.18	1.14	K-Ar	30.963	-115.615	Baja California	Ortega-Rivera et al 1997
d1-3	155		K-Ar	41.1928	-122.73	California	P.R. Renne (personal communications)
10057	52.5	3.2	K-Ar	57.0332	-131.54	British Columbia	Panteleyev, A.
10058	121	10	K-Ar	57.1148	-131.597	British Columbia	Panteleyev, A.
10060	218	12	K-Ar	58.1665	-131.835	British Columbia	Panteleyev, A.
10064	189	6	K-Ar	57.1498	-131.469	British Columbia	Panteleyev, A.
10078	73.9	5	K-Ar	59.3831	-129.911	British Columbia	Panteleyev, A.
10081	69.3	4.8	K-Ar	59.1498	-129.836	British Columbia	Panteleyev, A.
10081	76.1	5.4	K-Ar	59.1498	-129.836	British Columbia	Panteleyev, A.
10082	105	8	K-Ar	59.3081	-129.964	British Columbia	Panteleyev, A.
11669	127.9	8	K-Ar	52.5333	-122.201	British Columbia	Panteleyev, A.
11285	201	14	K-Ar	52.6583	-121.801	British Columbia	Panteleyev, A., Bailey, D.G., Bloodgood, M.A. and Hancock, K.D.
11287	182	12	K-Ar	52.4588	-121.476	British Columbia	Panteleyev, A., Bailey, D.G., Bloodgood, M.A. and Hancock, K.D.
11287	192	20	K-Ar	52.4588	-121.476	British Columbia	Panteleyev, A., Bailey, D.G., Bloodgood, M.A. and Hancock, K.D.
11288	193	14	K-Ar	52.6278	-121.643	British Columbia	Panteleyev, A., Bailey, D.G., Bloodgood, M.A. and Hancock, K.D.
11289	185	12	K-Ar	52.3949	-121.366	British Columbia	Panteleyev, A., Bailey, D.G., Bloodgood, M.A. and Hancock, K.D.
11291	188	7	K-Ar	52.5499	-121.635	British Columbia	Panteleyev, A., Bailey, D.G., Bloodgood, M.A. and Hancock, K.D.
10116	323	20	K-Ar	56.4499	-123.752	British Columbia	Pell, J.
14083	197	16	K-Ar	49.3399	-120.523	British Columbia	Preto, V.A.
14084	197	16	K-Ar	49.3565	-120.56	British Columbia	Preto, V.A.
14085	198	16	K-Ar	49.3399	-120.523	British Columbia	Preto, V.A.
14087	199	16	K-Ar	49.3632	-120.555	British Columbia	Preto, V.A.
14088	203	16	K-Ar	49.3665	-120.543	British Columbia	Preto, V.A.
14089	102	8	K-Ar	49.3482	-120.468	British Columbia	Preto, V.A.
14090	100	8	K-Ar	49.3565	-120.48	British Columbia	Preto, V.A.
14091	183	14	K-Ar	49.3382	-120.493	British Columbia	Preto, V.A.
14092	197	14	K-Ar	49.3415	-120.5	British Columbia	Preto, V.A.
14093	200	16	K-Ar	49.3499	-120.551	British Columbia	Preto, V.A.
13656	51.8	2	K-Ar	50.5249	-120.473	British Columbia	Preto, V.A., Osatenko, M.J., McMillan, W.J. and Armstrong, R.L.
13659	267	10	K-Ar	49.9332	-120.857	British Columbia	Preto, V.A., Osatenko, M.J., McMillan, W.J. and Armstrong, R.L.
13663	209	12	K-Ar	50.6616	-120.446	British Columbia	Preto, V.A., Osatenko, M.J., McMillan, W.J. and Armstrong, R.L.
13664	204	10	K-Ar	49.7315	-120.618	British Columbia	Preto, V.A., Osatenko, M.J., McMillan, W.J. and Armstrong, R.L.
13666	59.8	3.8	K-Ar	50.1832	-120.551	British Columbia	Preto, V.A., Osatenko, M.J., McMillan, W.J. and Armstrong, R.L.
13667	56.9	4.2	K-Ar	50.1999	-120.535	British Columbia	Preto, V.A., Osatenko, M.J., McMillan, W.J. and Armstrong, R.L.
13668	68.9	5	K-Ar	50.3249	-120.696	British Columbia	Preto, V.A., Osatenko, M.J., McMillan, W.J. and Armstrong, R.L.
13669	204	12	K-Ar	50.6182	-120.406	British Columbia	Preto, V.A., Osatenko, M.J., McMillan, W.J. and Armstrong, R.L.
13670	201	12	K-Ar	50.6616	-120.446	British Columbia	Preto, V.A., Osatenko, M.J., McMillan, W.J. and Armstrong, R.L.
13671	201	12	K-Ar	50.6616	-120.446	British Columbia	Preto, V.A., Osatenko, M.J., McMillan, W.J. and Armstrong, R.L.
13672	194	12	K-Ar	50.6616	-120.513	British Columbia	Preto, V.A., Osatenko, M.J., McMillan, W.J. and Armstrong, R.L.
13673	101	5.2	K-Ar	49.6165	-120.535	British Columbia	Preto, V.A., Osatenko, M.J., McMillan, W.J. and Armstrong, R.L.
13674	99.1	4.2	K-Ar	49.6082	-120.5	British Columbia	Preto, V.A., Osatenko, M.J., McMillan, W.J. and Armstrong, R.L.
13675	141	10	K-Ar	50.8749	-121.757	British Columbia	Preto, V.A., Osatenko, M.J., McMillan, W.J. and Armstrong, R.L.
12977	343	10	K-Ar	51.1666	-116.464	British Columbia	Rapson, J.E.
10313	52	1.8	K-Ar	58.0248	-130.585	British Columbia	Read, P.B.
13048	155	12	K-Ar	49.3119	-119.811	British Columbia	Read, P.B. and Okulitch, A.V.
14190	173	12	K-Ar	50.3665	-126.752	British Columbia	Rennie, C.
13834	105	6	K-Ar	49.3482	-121.581	British Columbia	Richards, T.A. and McTaggart, K.C.
13844	80	8	K-Ar	49.3915	-121.468	British Columbia	Richards, T.A. and McTaggart, K.C.
13845	84	8	K-Ar	49.3615	-121.48	British Columbia	Richards, T.A. and McTaggart, K.C.
13846	60	4	K-Ar	49.3165	-121.348	British Columbia	Richards, T.A. and McTaggart, K.C.
A1	88		K-Ar	38.9769	-119.888	Sierra Nevada	Robinson and Kistler, 1986
A2	86		K-Ar	38.9644	-119.85	Sierra Nevada	Robinson and Kistler, 1986
A3	84		K-Ar	38.9044	-119.966	Sierra Nevada	Robinson and Kistler, 1986
A4	83		K-Ar	38.8322	-119.912	Sierra Nevada	Robinson and Kistler, 1986
A4	85		K-Ar	38.8322	-119.912	Sierra Nevada	Robinson and Kistler, 1986
A5	88		K-Ar	38.8053	-119.972	Sierra Nevada	Robinson and Kistler, 1986
A6	73		K-Ar	38.1189	-119.968	Sierra Nevada	Robinson and Kistler, 1986
A7	89		K-Ar	38.7853	-119.881	Sierra Nevada	Robinson and Kistler, 1986
A8	87		K-Ar	38.7758	-119.9	Sierra Nevada	Robinson and Kistler, 1986
A9	87		K-Ar	38.7578	-119.968	Sierra Nevada	Robinson and Kistler, 1986
AA1	145		K-Ar	38.4833	-118.336	Sierra Nevada	Robinson and Kistler, 1986
AA2	100		K-Ar	38.4375	-118.373	Sierra Nevada	Robinson and Kistler, 1986
AA3	94		K-Ar	38.4314	-118.374	Sierra Nevada	Robinson and Kistler, 1986
AA5	95		K-Ar	38.3119	-118.433	Sierra Nevada	Robinson and Kistler, 1986
AA6	88		K-Ar	38.2814	-118.481	Sierra Nevada	Robinson and Kistler, 1986
B3	91		K-Ar	38.6947	-119.984	Sierra Nevada	Robinson and Kistler, 1986
B5	88		K-Ar	38.6333	-119.939	Sierra Nevada	Robinson and Kistler, 1986
B6	84		K-Ar	38.5822	-119.799	Sierra Nevada	Robinson and Kistler, 1986
BB1	84		K-Ar	38.24	-118.261	Sierra Nevada	Robinson and Kistler, 1986
C1	92		K-Ar	38.4878	-119.984	Sierra Nevada	Robinson and Kistler, 1986
C10	85.5		K-Ar	38.3636	-119.87	Sierra Nevada	Robinson and Kistler, 1986
C11	86		K-Ar	38.3408	-119.824	Sierra Nevada	Robinson and Kistler, 1986
C13	89		K-Ar	38.3264	-119.919	Sierra Nevada	Robinson and Kistler, 1986
C15	91		K-Ar	38.2858	-119.966	Sierra Nevada	Robinson and Kistler, 1986
C2	88		K-Ar	38.4181	-119.83	Sierra Nevada	Robinson and Kistler, 1986
C3	86		K-Ar	38.4161	-119.833	Sierra Nevada	Robinson and Kistler, 1986
C4	85		K-Ar	38.3983	-119.869	Sierra Nevada	Robinson and Kistler, 1986
C5	87		K-Ar	38.3808	-119.871	Sierra Nevada	Robinson and Kistler, 1986
C9	88		K-Ar	38.3658	-119.875	Sierra Nevada	Robinson and Kistler, 1986
EE13	70		K-Ar	38.3625	-118.051	Sierra Nevada	Robinson and Kistler, 1986
EE18	97		K-Ar	38.3153	-118.198	Sierra Nevada	Robinson and Kistler, 1986
EE20	101		K-Ar	38.3122	-118.196	Sierra Nevada	Robinson and Kistler, 1986
EE23	93		K-Ar	38.2769	-118.201	Sierra Nevada	Robinson and Kistler, 1986
EE24	90		K-Ar	38.2653	-118.238	Sierra Nevada	Robinson and Kistler, 1986
EE3	94		K-Ar	38.4244	-118.19	Sierra Nevada	Robinson and Kistler, 1986
F5	84		K-Ar	38.6419	-119.542	Sierra Nevada	Robinson and Kistler, 1986
F6	84		K-Ar	38.5847	-119.695	Sierra Nevada	Robinson and Kistler, 1986
FF15	90		K-Ar	38.0142	-118.142	Sierra Nevada	Robinson and Kistler, 1986
G1	84		K-Ar	38.4458	-119.67	Sierra Nevada	Robinson and Kistler, 1986
G2	84		K-Ar	38.4292	-119.747	Sierra Nevada	Robinson and Kistler, 1986
G3	83		K-Ar	38.4253	-119.705	Sierra Nevada	Robinson and Kistler, 1986
G4	82		K-Ar	38.3989	-119.607	Sierra Nevada	Robinson and Kistler, 1986
G5	85		K-Ar	38.35	-119.652	Sierra Nevada	Robinson and Kistler, 1986
G8	85		K-Ar	38.2886	-119.718	Sierra Nevada	Robinson and Kistler, 1986
H10	83		K-Ar	38.0319	-119.582	Sierra Nevada	Robinson and Kistler, 1986
H11	89		K-Ar	38.01	-119.725	Sierra Nevada	Robinson and Kistler, 1986
H12	89		K-Ar	38.0072	-119.725	Sierra Nevada	Robinson and Kistler, 1986
H2	86		K-Ar	38.1864	-119.571	Sierra Nevada	Robinson and Kistler, 1986
H3	84		K-Ar	38.1711	-119.517	Sierra Nevada	Robinson and Kistler, 1986
H4	83		K-Ar	38.1689	-119.591	Sierra Nevada	Robinson and Kistler, 1986
H5	85		K-Ar	38.1331	-119.609	Sierra Nevada	Robinson and Kistler, 1986
H8	83		K-Ar	38.1239	-119.633	Sierra Nevada	Robinson and Kistler, 1986
H9	93		K-Ar	38.0381	-119.666	Sierra Nevada	Robinson and Kistler, 1986
I3	84		K-Ar	38.8311	-119.42	Sierra Nevada	Robinson and Kistler, 1986
J3	82		K-Ar	38.5217	-119.417	Sierra Nevada	Robinson and Kistler, 1986
J4	82		K-Ar	38.5083	-119.488	Sierra Nevada	Robinson and Kistler, 1986
K1	78		K-Ar	38.4833	-119.317	Sierra Nevada	Robinson and Kistler, 1986
K10	81		K-Ar	38.35	-119.325	Sierra Nevada	Robinson and Kistler, 1986
K3	122		K-Ar	38.4514	-119.458	Sierra Nevada	Robinson and Kistler, 1986
K8	86		K-Ar	38.35	-119.375	Sierra Nevada	Robinson and Kistler, 1986
K9	81		K-Ar	38.35	-119.333	Sierra Nevada	Robinson and Kistler, 1986
L1	82		K-Ar	38.1483	-119.427	Sierra Nevada	Robinson and Kistler, 1986
L2	82		K-Ar	38.1483	-119.389	Sierra Nevada	Robinson and Kistler, 1986
L3	84		K-Ar	38.1256	-119.436	Sierra Nevada	Robinson and Kistler, 1986
L4	83		K-Ar	38.1233	-119.427	Sierra Nevada	Robinson and Kistler, 1986
M6	103		K-Ar	38.8244	-119.199	Sierra Nevada	Robinson and Kistler, 1986
N16	90.5		K-Ar	38.5797	-119.187	Sierra Nevada	Robinson and Kistler, 1986
N8	81		K-Ar	38.6708	-119.179	Sierra Nevada	Robinson and Kistler, 1986
O1	98		K-Ar	38.4333	-119.067	Sierra Nevada	Robinson and Kistler, 1986
P28	95		K-Ar	38.0794	-119.163	Sierra Nevada	Robinson and Kistler, 1986
P29	93		K-Ar	38.0425	-119.192	Sierra Nevada	Robinson and Kistler, 1986
Q14	82		K-Ar	38.9256	-119.852	Sierra Nevada	Robinson and Kistler, 1986
Q15	82		K-Ar	38.9267	-118.843	Sierra Nevada	Robinson and Kistler, 1986
Q6	81		K-Ar	38.9833	-119.925	Sierra Nevada	Robinson and Kistler, 1986
R1	78		K-Ar	38.7031	-118.804	Sierra Nevada	Robinson and Kistler, 1986
R2	98		K-Ar	38.695	-118.895	Sierra Nevada	Robinson and Kistler, 1986
S8	77		K-Ar	38.4214	-118.767	Sierra Nevada	Robinson and Kistler, 1986
V1	96		K-Ar	38.6583	-118.505	Sierra Nevada	Robinson and Kistler, 1986
Y1	161		K-Ar	38.8617	-118.448	Sierra Nevada	Robinson and Kistler, 1986
14005	107.4	3.3	K-Ar	49.4762	-120.971	British Columbia	Roddick, J.C. and Farrar, E.
14006	100.4	2.4	K-Ar	49.5054	-120.94	British Columbia	Roddick, J.C. and Farrar, E.
14009	104.7	3.2	K-Ar	49.4902	-120.954	British Columbia	Roddick, J.C. and Farrar, E.
14011	109.1	3.4	K-Ar	49.4332	-120.861	British Columbia	Roddick, J.C. and Farrar, E.
14012	115.1	3.6	K-Ar	49.1137	-120.661	British Columbia	Roddick, J.C. and Farrar, E.
14147	175.8	5.2	K-Ar	49.5665	-120.901	British Columbia	Roddick, J.C. and Farrar, E.
14149	130.8	4	K-Ar	49.4815	-120.82	British Columbia	Roddick, J.C. and Farrar, E.
14152	155.4	4.6	K-Ar	49.4598	-120.835	British Columbia	Roddick, J.C. and Farrar, E.
14050	155.567	9.33333	K-Ar	49.3415	-120.06	British Columbia	Roddick, J.C., Farrar, E. and Procyshyn, E.L.
14051	155.9	9.6	K-Ar	49.3262	-120.112	British Columbia	Roddick, J.C., Farrar, E. and Procyshyn, E.L.
14052	144.9	8.8	K-Ar	49.6832	-120.285	British Columbia	Roddick, J.C., Farrar, E. and Procyshyn, E.L.
14053	154.5	9.2	K-Ar	49.6665	-120.335	British Columbia	Roddick, J.C., Farrar, E. and Procyshyn, E.L.
14054	164.5	9.6	K-Ar	49.4082	-120.076	British Columbia	Roddick, J.C., Farrar, E. and Procyshyn, E.L.
14055	145.6	8.8	K-Ar	49.7165	-120.168	British Columbia	Roddick, J.C., Farrar, E. and Procyshyn, E.L.
14062	160.9	9.6	K-Ar	49.3444	-120.044	British Columbia	Roddick, J.C., Farrar, E. and Procyshyn, E.L.
14063	160.4	9.6	K-Ar	49.3527	-120.023	British Columbia	Roddick, J.C., Farrar, E. and Procyshyn, E.L.
[truncated: 440 more rows]
